# Supplementary material
Source: PubMed Central journal article supplement (PMC4204490)
Supplement: NIHMS538572-supplement-supporting_information.pdf [file NIHMS538572-supplement-supporting_information.pdf]

## Supporting information

### Gas phase studies of substrates for the DNA mismatch repair enzyme MutY

Anna Zhachkina Michelson<sup>‡</sup>, Aleksandr Rosenberg<sup>‡</sup>, Yuan Tian<sup>‡</sup>, Xujeun Sun<sup>‡</sup>,  
Julianne Davis<sup>‡</sup>, Anthony W. Francis<sup>€</sup>, Valerie O'Shea<sup>€</sup>, Mohan Halasyam<sup>€</sup>, Amelia H.  
Manlove<sup>x</sup>, Sheila David<sup>\*,x,€</sup>, Jeehiun K. Lee<sup>\*,‡</sup>

*<sup>‡</sup>Department of Chemistry and Chemical Biology*

*Rutgers, The State University of New Jersey, New Brunswick, NJ 08901*

*jee.lee@rutgers.edu*

*<sup>€</sup>Department of Chemistry, University of Utah, Salt Lake City, UT 84112*

*<sup>x</sup>Department of Chemistry, University of California, Davis, CA 95616*

*david@chem.davis.edu*

Table of Contents:

|                                                                                                                                                                     |    |
|---------------------------------------------------------------------------------------------------------------------------------------------------------------------|----|
| 1. <i>Acid-catalyzed depurination</i> .....                                                                                                                         | 8  |
| 2. <i>General Synthetic Procedures</i> .....                                                                                                                        | 10 |
| 3. <i>Experimental for synthetic intermediates</i> .....                                                                                                            | 10 |
| 1-deazaadenine (Z1).....                                                                                                                                            | 10 |
| 1-Deaza-2'-deoxyadenosine phosphoramidite (4).....                                                                                                                  | 11 |
| 1-Deaza-N <sup>6</sup> -(N, N-Dimethylaminomethylene)-2'-deoxyadenosine (2).....                                                                                    | 11 |
| 1-Deaza-5'-O-(4.4'-dimethoxytrityl)-N <sup>6</sup> -(N,N-dimethylaminomethylene)-2'-deoxyadenosine (3)<br>.....                                                     | 12 |
| 1-Deaza-5'-O-(4.4'-dimethoxytrityl)-N <sup>6</sup> -(N,N-dimethylaminomethylene)-2'-deoxyadenosine-3'-<br>O-[2-cyanoethyl]-N,N-diisopropylphosphoramidite] (4)..... | 13 |
| 4. <i>Oligonucleotide Synthesis</i> .....                                                                                                                           | 13 |
| 5. <i>MutY Cleavage Assays</i> .....                                                                                                                                | 14 |
| 6. <i>Acid-Catalyzed Depurination reactions</i> .....                                                                                                               | 14 |
| 7. <i>Full References from Manuscript</i> .....                                                                                                                     | 15 |
| 8. <i>Cooks kinetic method</i> .....                                                                                                                                | 16 |
| 9. <i>Cartesian coordinates and energies (in Hartree) for species calculated</i> .....                                                                              | 19 |
| Z (7-deazaadenine): neutral, protonated and deprotonated species .....                                                                                              | 23 |
| Amino N9H Z (Z-1) B3LYP/6-31+G(d) .....                                                                                                                             | 23 |
| N1H-N9H-imino_N7side Z (Z-2) B3LYP/6-31+G(d).....                                                                                                                   | 23 |
| Amino N3H Z (Z-3) B3LYP/6-31+G(d) .....                                                                                                                             | 24 |
| Amino C7H Z (Z-4) B3LYP/6-31+G(d) .....                                                                                                                             | 25 |
| N1H-N9H-imino_N1side Z (Z-5) B3LYP/6-31+G(d).....                                                                                                                   | 25 |
| Amino N1H Z (Z-6) B3LYP/6-31+G(d) .....                                                                                                                             | 26 |
| Amino N1H Z (Z-6) B3LYP/6-31+G(d) cpcm in water, RADII=UAKS .....                                                                                                   | 27 |
| N3H-N9H-imino_N1side Z (Z-7) B3LYP/6-31+G(d).....                                                                                                                   | 27 |
| N3H-N9H-imino_N7side Z (Z-8) B3LYP/6-31+G(d).....                                                                                                                   | 28 |
| N10-deprotonated N9H-amino(N10H_N1side) Z (Z-9) B3LYP/6-31+G(d).....                                                                                                | 28 |
| N10-deprotonated N9H-amino (N10H_N7side) Z (Z-10) B3LYP/6-31+G(d).....                                                                                              | 29 |
| N9-deprotonated N9H-amino Z (Z-11) B3LYP/6-31+G(d) .....                                                                                                            | 30 |
| C8-deprotonated N9H-amino Z (Z-12) B3LYP/6-31+G(d) .....                                                                                                            | 30 |
| C7-deprotonated N9H-amino Z (Z-13) .....                                                                                                                            | 31 |
| C2-deprotonated N9H-amino Z (Z-14) B3LYP/6-31+G(d) .....                                                                                                            | 32 |
| N1-protonated N9H-amino Z (Z-15) B3LYP/6-31+G(d) .....                                                                                                              | 33 |
| N1-protonated N9H-amino Z (Z-15) B3LYP/6-31+G(d) cpcm, water, RADII=UAKS .....                                                                                      | 33 |
| N3-protonated N9H-amino Z (Z-16) B3LYP/6-31+G(d) .....                                                                                                              | 34 |
| N9-protonated N9H-amino Z (Z-17) B3LYP/6-31+G(d) .....                                                                                                              | 34 |

|                                                                                    |    |
|------------------------------------------------------------------------------------|----|
| C7-protonated N9H-amino Z (Z-18) B3LYP/6-31+G(d) .....                             | 35 |
| N10-protonated N9H-amino Z (Z-19) B3LYP/6-31+G(d) .....                            | 36 |
| Z3 (3-deazaadenine): neutral, protonated and deprotonated species .....            | 36 |
| Amino N9H Z3 (Z3-1) B3LYP/6-31+G(d) .....                                          | 36 |
| Amino N7H Z3 (Z3-2) B3LYP/6-31+G(d) .....                                          | 37 |
| Amino N1H Z3 (Z3-3) B3LYP/6-31+G(d) .....                                          | 38 |
| Amino N1H Z3 (Z3-3) B3LYP/6-31+G(d) cpcm, water, RADII=UAKS.....                   | 39 |
| Imino (H toward N7) N1H N9H Z3 (Z3-4) B3LYP/6-31+G(d).....                         | 39 |
| Imino (H toward N1) N1H N7H Z3 (Z3-5) B3LYP/6-31+G(d).....                         | 39 |
| Imino (H toward N7) N1H N7H Z3 (Z3-6) B3LYP/6-31+G(d).....                         | 40 |
| Imino (H toward N1) N1H N9H Z3 (Z3-7) B3LYP/6-31+G(d).....                         | 41 |
| N10-deprotonated N9H-amino (N10H_N1side) Z3 (Z3-8) B3LYP/6-31+G(d).....            | 42 |
| N10-deprotonated N9H-amino (N10H_N7side) Z3 (Z3-9) B3LYP/6-31+G(d).....            | 42 |
| N9-deprotonated N9H-amino Z3 (Z3-10) B3LYP/6-31+G(d) .....                         | 43 |
| C8-deprotonated N9H-amino Z3 (Z3-11) B3LYP/6-31+G(d) .....                         | 44 |
| C2-deprotonated N9H-amino Z3 (Z3-12) B3LYP/6-31+G(d) .....                         | 44 |
| C3-deprotonated N9H-amino Z3 (Z3-13) B3LYP/6-31+G(d) .....                         | 45 |
| N1-protonated N9H-amino Z3 (Z3-14) B3LYP/6-31+G(d) .....                           | 46 |
| N1-protonated N9H-amino Z3 (Z3-14) B3LYP/6-31+G(d) (cpcm, water, RADII=UAKS) ..... | 46 |
| N7-protonated N9H-amino Z3 (Z3-15) B3LYP/6-31+G(d) .....                           | 47 |
| N9-protonated N9H-amino Z3 (Z3-16) B3LYP/6-31+G(d) .....                           | 47 |
| N10-protonated N9H-amino Z3 (Z3-17) B3LYP/6-31+G(d) .....                          | 48 |
| N10-deprotonated N7H-amino (N10H_N1side) Z3 (Z3-18) B3LYP/6-31+G(d).....           | 49 |
| N10-deprotonated N7H-amino (N10H_N7side) Z3 (Z3-19) B3LYP/6-31+G(d).....           | 49 |
| C8-deprotonated N7H-amino Z3 (Z3-20) B3LYP/6-31+G(d) .....                         | 50 |
| C2-deprotonated N7H-amino Z3 (Z3-21) B3LYP/6-31+G(d) .....                         | 51 |
| C3-deprotonated N7H-amino Z3 (Z3-22) B3LYP/6-31+G(d) .....                         | 52 |
| N1-protonated N7H-amino Z3 (Z3-23) B3LYP/6-31+G(d) .....                           | 52 |
| N7-protonated N7H-amino Z3 (Z3-24) B3LYP/6-31+G(d) .....                           | 53 |
| N10-protonated N7H-amino Z3 (Z3-25) B3LYP/6-31+G(d) .....                          | 54 |
| Z1 (1-deazaadenine): neutral, protonated and deprotonated species .....            | 55 |
| Amino N9H Z1 (Z1-1) B3LYP/6-31+G(d) .....                                          | 55 |
| Amino N3H Z1 (Z1-2) B3LYP/6-31+G(d) .....                                          | 55 |
| Amino N3H Z1 (Z1-2) B3LYP/6-31+G(d) cpcm, water, RADII=UAKS.....                   | 56 |
| Amino N7H Z1 (Z1-3) B3LYP/6-31+G(d) .....                                          | 56 |
| Imino (H toward C1) N7H N3H Z1 (Z1-4) B3LYP/6-31+G(d) .....                        | 57 |
| Imino (H toward N7) N7H N3H Z1 (Z1-5) B3LYP/6-31+G(d) .....                        | 58 |

|                                                                                       |    |
|---------------------------------------------------------------------------------------|----|
| Imino (H toward N7) N9H N3H Z1 (Z1-6) B3LYP/6-31+G(d) .....                           | 58 |
| Imino (H toward C1) N9H N3H Z1 (Z1-7) B3LYP/6-31+G(d) .....                           | 59 |
| N10-deprotonated (N10H toward N7) amino N9H Z1 (Z1-8) B3LYP/6-31+G(d) .....           | 60 |
| N10-deprotonated (N10H toward C1) amino N9H Z1 (Z1-9) B3LYP/6-31+G(d) .....           | 60 |
| N9-deprotonated amino N9H Z1 (Z1-10) B3LYP/6-31+G(d) .....                            | 61 |
| C8-deprotonated amino N9H Z1 (Z1-11) B3LYP/6-31+G(d) .....                            | 62 |
| C1-deprotonated amino N9H Z1 (Z1-12) B3LYP/6-31+G(d) .....                            | 62 |
| C2-deprotonated amino N9H Z1 (Z1-13) B3LYP/6-31+G(d) .....                            | 63 |
| N7-protonated amino N9H Z1 (Z1-14) B3LYP/6-31+G(d) .....                              | 64 |
| N3-protonated amino N9H Z1 (Z1-15) B3LYP/6-31+G(d) .....                              | 65 |
| N3-protonated amino N9H Z1 (Z1-15) B3LYP/6-31+G(d), cpcm, water, RADII=UAKS.....      | 65 |
| N9-protonated amino N9H Z1 (Z1-16) B3LYP/6-31+G(d) .....                              | 66 |
| N10-protonated amino N9H Z1 (Z1-17) B3LYP/6-31+G(d) .....                             | 66 |
| N10-deprotonated (N10H toward N7) amino N3H Z1 (Z1-18) B3LYP/6-31+G(d) .....          | 67 |
| N10-deprotonated (N10H toward C1) amino N3H Z1 (Z1-19) B3LYP/6-31+G(d) .....          | 68 |
| C2-deprotonated amino N3H Z1 (Z1-20) B3LYP/6-31+G(d) .....                            | 68 |
| C1-deprotonated amino N3H Z1 (Z1-21) B3LYP/6-31+G(d) .....                            | 69 |
| C8-deprotonated amino N3H Z1 (Z1-22) B3LYP/6-31+G(d) .....                            | 70 |
| N3-protonated amino N3H Z1 (Z1-23) B3LYP/6-31+G(d) .....                              | 70 |
| N7-protonated amino N3H Z1 (Z1-24) B3LYP/6-31+G(d) .....                              | 71 |
| N10-protonated amino N3H Z1 (Z1-25) B3LYP/6-31+G(d) .....                             | 72 |
| N10-deprotonated (N10H toward C1) amino N7H Z1 (Z1-26) B3LYP/6-31+G(d) .....          | 73 |
| N10-deprotonated (N10H toward N7) amino N7H Z1 (Z1-27) B3LYP/6-31+G(d) .....          | 73 |
| C8-deprotonated amino N7H Z1 (Z1-28) B3LYP/6-31+G(d) .....                            | 74 |
| C1-deprotonated amino N7H Z1 (Z1-29) B3LYP/6-31+G(d) .....                            | 75 |
| C2-deprotonated amino N7H Z1 (Z1-30) B3LYP/6-31+G(d) .....                            | 76 |
| N7-protonated amino N7H Z1 (Z1-31) B3LYP/6-31+G(d) .....                              | 76 |
| N10-protonated amino N7H Z1 (Z1-32) B3LYP/6-31+G(d) .....                             | 77 |
| Q ("6-methylated" 1-deazaadenine): neutral, protonated and deprotonated species ..... | 78 |
| Amino N9H Q (Q-1) B3LYP/6-31+G(d) .....                                               | 78 |
| Amino N9H-Q (Q1) B3LYP/6-31+G(d) cpcm in water; RADII=UAKS .....                      | 79 |
| Amino N7H Q (Q-2) B3LYP/6-31+G(d) .....                                               | 79 |
| Amino N7H-Q (Q2) B3LYP/6-31+G(d) cpcm in water; RADII=UAKS .....                      | 80 |
| Amino N3H Q (Q-3) B3LYP/6-31+G(d) .....                                               | 80 |
| N9-deprotonated amino N9H Q (Q-4) B3LYP/6-31+G(d) .....                               | 81 |
| CH3-deprotonated amino N9H Q (Q-5) B3LYP/6-31+G(d) .....                              | 81 |
| C8-deprotonated amino N9H Q (Q-6) B3LYP/6-31+G(d) .....                               | 82 |

|                                                                                          |     |
|------------------------------------------------------------------------------------------|-----|
| C1-deprotonated amino N9H Q (Q-7) B3LYP/6-31+G(d) .....                                  | 83  |
| C2-deprotonated amino N9H Q (Q-8) B3LYP/6-31+G(d) .....                                  | 83  |
| N7-protonated amino N9H Q (Q-9) B3LYP/6-31+G(d) .....                                    | 84  |
| N7-protonated amino N9H Q (Q-9) B3LYP/6-31+G(d) cpcm in water, RADII=UAKS .....          | 85  |
| N3-protonated amino N9H Q (Q-10) B3LYP/6-31+G(d) .....                                   | 85  |
| N9-protonated amino N9H Q (Q-11) B3LYP/6-31+G(d) .....                                   | 86  |
| CH3-deprotonated amino N7H Q (Q-12) B3LYP/6-31+G(d) .....                                | 86  |
| C8-deprotonated amino N7H Q (Q-13) B3LYP/6-31+G(d) .....                                 | 87  |
| C1-deprotonated amino N7H Q (Q-14) B3LYP/6-31+G(d) .....                                 | 88  |
| C2-deprotonated amino N7H Q (Q-15) B3LYP/6-31+G(d) .....                                 | 89  |
| N3-protonated amino N7H Q (Q-16) B3LYP/6-31+G(d) .....                                   | 89  |
| N7-protonated amino N7H Q (Q-17) B3LYP/6-31+G(d) .....                                   | 90  |
| C8-deprotonated amino N3H Q (Q-18) B3LYP/6-31+G(d) .....                                 | 91  |
| C1-deprotonated amino N3H Q (Q-19) B3LYP/6-31+G(d) .....                                 | 92  |
| C2-deprotonated amino N3H Q (Q-20) B3LYP/6-31+G(d) .....                                 | 92  |
| CH3-deprotonated amino N3H Q (Q-21) B3LYP/6-31+G(d) .....                                | 93  |
| N3-protonated amino N3H Q (Q-22) B3LYP/6-31+G(d) .....                                   | 94  |
| M ("6-methylated" 1,3,7-deazaadenine): neutral, protonated and deprotonated species..... | 95  |
| Amino N9H M (M-1) B3LYP/6-31+G(d) .....                                                  | 95  |
| Amino C7H M (M-2) B3LYP/6-31+G(d) .....                                                  | 95  |
| C8-deprotonated amino N9H M (M-3) B3LYP/6-31+G(d) .....                                  | 96  |
| C1-deprotonated amino N9H M (M-4) B3LYP/6-31+G(d) .....                                  | 97  |
| C2-deprotonated amino N9H M (M-5) B3LYP/6-31+G(d) .....                                  | 98  |
| C3-deprotonated amino N9H M (M-6) B3LYP/6-31+G(d) .....                                  | 98  |
| CH3-deprotonated amino N9H M (M-7) B3LYP/6-31+G(d) .....                                 | 99  |
| N9-deprotonated amino N9H M (M-8) B3LYP/6-31+G(d) .....                                  | 99  |
| C7-deprotonated amino N9H M (M-9) B3LYP/6-31+G(d) .....                                  | 100 |
| N9-protonated amino N9H M (M-10) B3LYP/6-31+G(d) .....                                   | 101 |
| C7-protonated amino N9H M (M-11) B3LYP/6-31+G(d) .....                                   | 102 |
| C8-deprotonated amino C7H M (M-12) B3LYP/6-31+G(d) .....                                 | 102 |
| C1-deprotonated amino C7H M (M-13) B3LYP/6-31+G(d) .....                                 | 103 |
| C2-deprotonated amino C7H M (M-14) B3LYP/6-31+G(d) .....                                 | 104 |
| C3-deprotonated amino C7H M (M-15) B3LYP/6-31+G(d) .....                                 | 105 |
| CH3-deprotonated amino C7H M (M-16) B3LYP/6-31+G(d) .....                                | 105 |
| B ("6-methylated" 1,3-deazaadenine): neutral, protonated and deprotonated species .....  | 106 |
| Amino N9H B (B-1) B3LYP/6-31+G(d) .....                                                  | 106 |
| Amino N7H B (B-2) B3LYP/6-31+G(d) .....                                                  | 107 |

|                                                                                                    |     |
|----------------------------------------------------------------------------------------------------|-----|
| Amino N7H B (B-2) B3LYP/6-31+G(d) cpcm, water, RADII=UAKS.....                                     | 108 |
| C8-deprotonated amino N9H B (B-3) B3LYP/6-31+G(d) .....                                            | 108 |
| CH3-deprotonated amino N9H B (B-4) B3LYP/6-31+G(d).....                                            | 109 |
| C1-deprotonated amino N9H B (B-5) B3LYP/6-31+G(d) .....                                            | 109 |
| C2-deprotonated amino N9H B (B-6) B3LYP/6-31+G(d) .....                                            | 110 |
| N9-deprotonated amino N9H B (B-7) B3LYP/6-31+G(d) .....                                            | 111 |
| C3-deprotonated amino N9H B (B-8) B3LYP/6-31+G(d) .....                                            | 112 |
| N9-protonated amino N9H B (B-9) B3LYP/6-31+G(d).....                                               | 112 |
| N7-protonated amino N9H B (B-10) B3LYP/6-31+G(d).....                                              | 113 |
| N7-protonated amino N9H B (B-10) B3LYP/6-31+G(d) cpcm, water, RADII=UAKS.....                      | 114 |
| C8-deprotonated amino N7H B (B-11) B3LYP/6-31+G(d) .....                                           | 114 |
| C1-deprotonated amino N7H B (B-12) B3LYP/6-31+G(d) .....                                           | 115 |
| C2-deprotonated amino N7H B (B-13) B3LYP/6-31+G(d) .....                                           | 115 |
| C3-deprotonated amino N7H B (B-14) B3LYP/6-31+G(d) .....                                           | 116 |
| CH3-deprotonated amino N7H B (B-15) B3LYP/6-31+G(d).....                                           | 117 |
| N7-protonated amino N7H B (B-16) B3LYP/6-31+G(d).....                                              | 118 |
| Z13 (1,3-deazaadenine): neutral and protonated species .....                                       | 118 |
| Amino N7H Z13 (Z13-1) B3LYP/6-31+G(d) .....                                                        | 118 |
| Amino N7H Z13 (Z13-1) B3LYP/6-31+G(d) cpcm, water, RADII=UAKS.....                                 | 119 |
| N7-protonated amino N9H Z13 (Z13-2) B3LYP/6-31+G(d) .....                                          | 119 |
| N7-protonated amino N9H Z13 (Z13-2) B3LYP/6-31+G(d) cpcm, water, RADII=UAKS.....                   | 120 |
| Adenine hydrogen-bonded to HF at N3: N7-protonated and N7-protonated-N9-deprotonated species ..... | 120 |
| N7-protonated N9H-adenine HF hydrogen-bound to N3 (A-N3HF-1) B3LYP/6-31+G(d) .....                 | 121 |
| N9-deprotonated N7-protonated N9H-adenine HF hydrogen-bound to N3 (A-N3HF-2) B3LYP/6-31+G(d).....  | 121 |
| Q hydrogen-bound to HF at N3: N7-protonated and N7-protonated-N9-deprotonated species .....        | 122 |
| N7-protonated N9H-Q HF hydrogen-bound to N3 (Q-N3HF-1) B3LYP/6-31+G(d).....                        | 122 |
| N9-deprotonated N7-protonated N9H-Q HF hydrogen-bound to N3 (Q-N3HF-2) B3LYP/6-31+G(d).....        | 123 |
| Z1 hydrogen-bound to HF at N3: N7-protonated and N7-protonated-N9-deprotonated species .....       | 124 |
| N7-protonated N9H-Z1 HF hydrogen-bound to N3 (Z1-N3HF-1) B3LYP/6-31+G(d).....                      | 124 |
| N9-deprotonated N7-protonated N9H-Z1 HF hydrogen-bound to N3 (Z1-N3HF-2) B3LYP/6-31+G(d).....      | 125 |
| Z hydrogen-bonded to HF at N3: neutral and N7-protonated-N9-deprotonated species .....             | 125 |
| N9H-Z HF hydrogen-bound to N3 (Z-N3HF-1) B3LYP/6-31+G(d) .....                                     | 125 |
| N9-deprotonated N9H-Z HF hydrogen-bound to N3 (Z-N3HF-2) B3LYP/6-31+G(d).....                      | 126 |

|                                                                                                                  |            |
|------------------------------------------------------------------------------------------------------------------|------------|
| <b>N1 protonated adenine (cpcm calculations in water) .....</b>                                                  | <b>127</b> |
| <b>N1-protonated N9H-adenine (A-1) B3LYP/6-31+G(d) (cpcm, water, RADII=UAKS).....</b>                            | <b>127</b> |
| <b>N9-deprotonated N1-protonated N9H-adenine (neutral) (A-2) B3LYP/6-31+G(d) (cpcm, water, RADII=UAKS) .....</b> | <b>128</b> |

## 1. Acid-catalyzed depurination

Acid-catalyzed depurination experiments were performed to determine the intrinsic lability of the Z1 and Z3 analogues compared to adenine (Figure S1). Adenine at position 11 of the 30 nt sequence was selected for comparison to all other purines in the sequence, except for G26 and A27 whose bands could not be well distinguished. In particular, the A, Z1, or Z3 at position 15 are depurinated at fractions of 0.9, 6.3, and 0.3 compared to A11, respectively. Plots of relative depurination show that Z1 is depurinated seven times *more than* adenine at the same position (Figure S2).

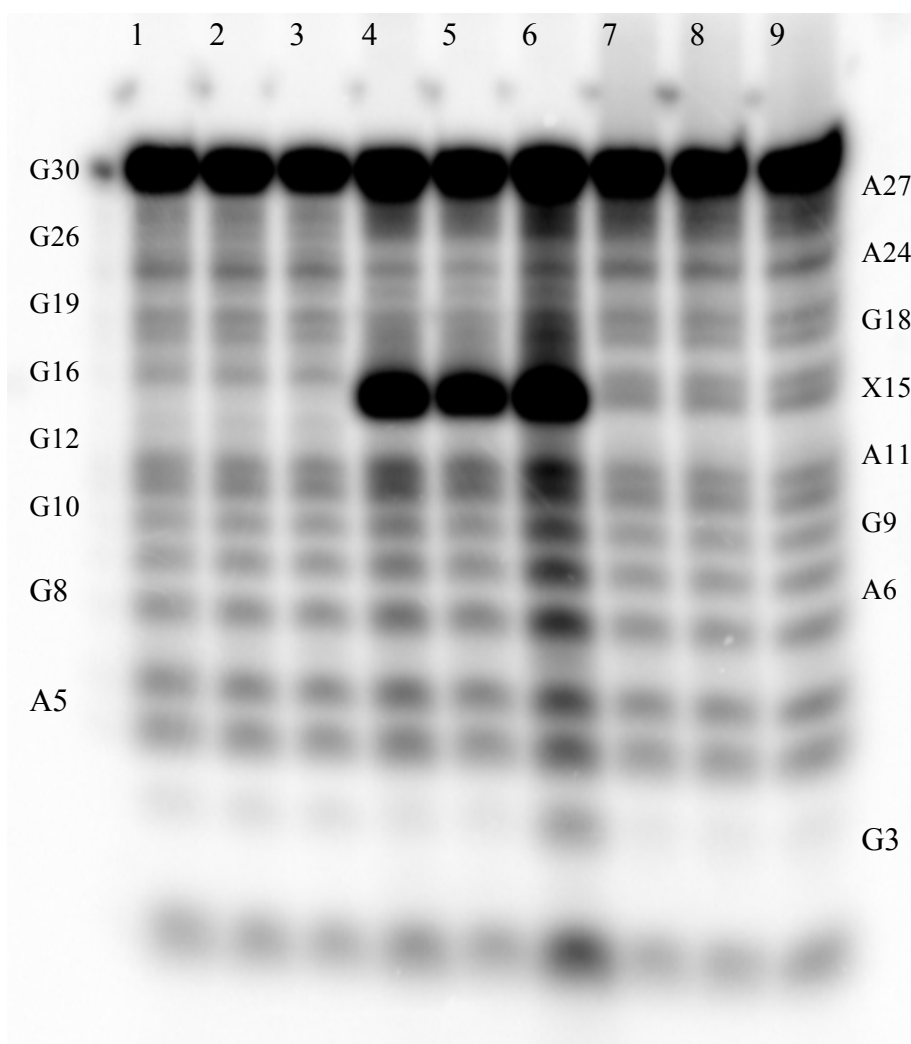

**Figure S1:** PAGE analysis of acid-catalyzed depurination reactions of X at position 15 in 30 nt sequence. Lanes 1 – 3, X = Z3, Lanes 4-6, X = Z1, Lanes 7-9, X = A. Purine position is indicated along both sides of the gel.



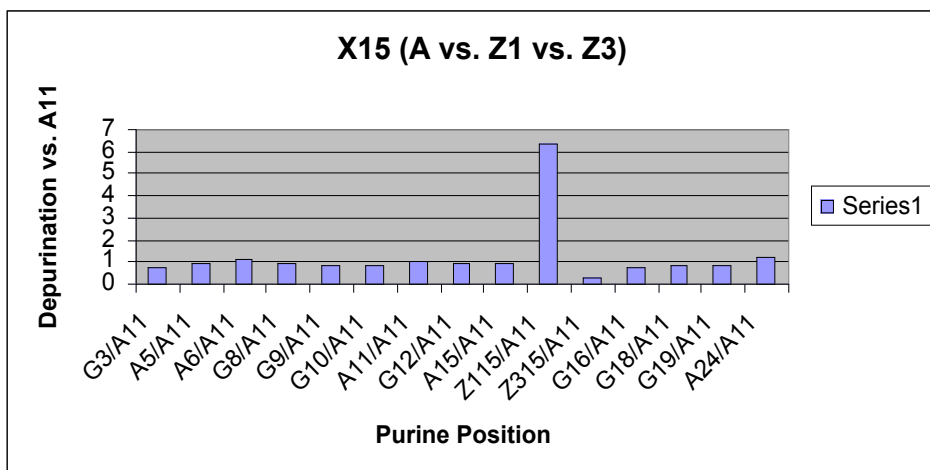

**Figure S2:** Comparison of acid-catalyzed depurination of purines of the B30 sequence. All positions are compared to depurination of A11 and are the result of nine experiments except position 15, which was either A, Z1, or Z3 and is the average of three experiments each.

## 2. General Synthetic Procedures.

Solvents were freshly distilled before use: THF and C<sub>5</sub>H<sub>5</sub>N from Na, benzophenone; CH<sub>2</sub>Cl<sub>2</sub> and MeOH from CaH<sub>2</sub>. Reactions were carried out in flame-dried round bottom flasks fitted with rubber septa under Ar at 23°. Air-, moisture- sensitive liquids and solutions were transferred via syringe or stainless steel canula. Organic solutions were concentrated by evaporation of the volatiles at 25°C / ca. 10 mm Hg. Products from reactions were dried in a vacuum dessicator (KOH) at 0.05 mm Hg prior to use in subsequent reactions. Thin-layer chromatography utilized *Merck* silica gel 60-F<sub>254</sub> Al plates; detection by Mineralight multiband UV lamp at 254 and 365 nm and / or by heating with acidic *p*-anisaldehyde (prepared by adding 50 ml con. H<sub>2</sub>SO<sub>4</sub> dropwise to an ice-cold solution of 15 mL AcOH, 3.5 mL *p*-anisaldehyde in 300 mL EtOH). Flash chromatography (FC) utilized silica gel *Merck* 60 (230-400 mesh. NMR Spectra: *Varian* ASM100 and VXR500.  $\delta$  in ppm rel. to external TMS (<sup>1</sup>H, <sup>13</sup>C) and to external 85% H<sub>3</sub>PO<sub>4</sub> soln. (<sup>31</sup>P); coupling constants *J* in Hz. High-resolution mass spectra: Finnigan Mat 95.

## 3. Experimental for synthetic intermediates

### **1-deazaadenine (Z1).**

7-Nitro-1*H*-imidazo[4,5-*b*]pyridine 4-oxide (2.24 g, 12.4 mmol) was suspended in 22.5 mL water at 0 °C. The suspension was treated portionwise with 135 mL titanium(III) chloride in 20-30% HCl, mixing thoroughly after each addition. During this process, the reaction mixture became green and homogeneous, and gas evolution was evident. The reaction mixture was then stirred 2 d at rt until the solution was dark brownish-yellow. The solution was brought to pH 9 with saturated aq Na<sub>2</sub>CO<sub>3</sub> then filtered. The blue-white precipitate was triturated with acetone (1 x 75 mL), and the filtrate was concentrated *in vacuo* to an amorphous yellow residue. This residue was triturated with acetone (3 x 75 mL). Acetone aliquots were combined and concentrated *in vacuo* to give 2.15 g of crude 1-deazaadenine.

$^1\text{H}$  NMR (400 MHz,  $\text{DMSO-}d_6$ )  $\delta$  12.54 (s, 1H), 8.01 (s, 1H), 7.79 (d,  $J = 5.4$ , 1H), 6.31 (d,  $J = 5.4$ , 1H), 6.22 (s, 2H).

### **1-Deaza-2'-deoxyadenosine phosphoramidite (4).**

The synthesis of the phosphoramidite monomer (4) was designed as shown in Scheme S1 starting with amine **1** (refs: Seela, F; Wenzel, T. *Helv. Chim. Acta*, **1994**, 77, 1485; Seela, F; Wenzel, T. *Heterocycles*, **1993**, 36, 237).

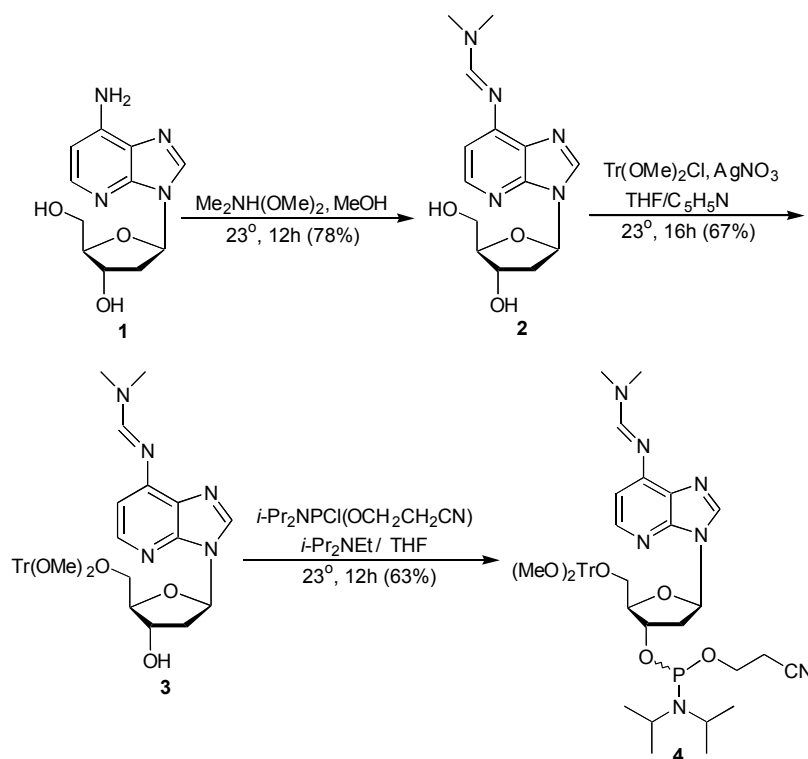

**Scheme S1.** Synthesis of 1-deaza-2'-deoxyadenosine phosphoramidite

### **1-Deaza- $N^6$ -(*N,N*-Dimethylaminomethylene)-2'-deoxyadenosine (2)**

A stirred mixture of 6-amino compound **1** (1.18 g, 4.7 mmol;  $R_f$  ( $\text{CHCl}_3 / \text{MeOH} / \text{NEt}_3$  17:3:0.01) 0.33) in MeOH (20 mL) was treated with *N,N*-Dimethylformamide dimethyl acetal (2.1 mL, 14.1 mmol). After 12 h, the reaction solution was concentrated and coevaporated with toluene (2 x 25 mL). The residue was treated with MeOH (20 mL), stirred for 2 h and concentrated. FC ( $\text{CHCl}_3 / \text{MeOH} / \text{NEt}_3$  9:1:0.01) gave the imine **2** (1.1 g, 78%). Colorless glass.  $R_f$  ( $\text{CHCl}_3 / \text{MeOH} / \text{NEt}_3$  17:3:0.01) 0.46.  $^1\text{H-NMR}$  ( $\text{CD}_3\text{OD}$ , 300 MHz): 2.32-2.42 (*m*, 1H), 2.84-2.93 (*m*, 1H), 3.11 (s, 3H), 3.17 (s, 3H),

3.75 (*dd*,  $J = 12.3, 3.0$ , 1H), 3.86 (*dd*,  $J = 12.3, 2.6$ , 1H), 4.08-4.11 (*m*, 1H), 4.57-4.61 (*m*, 1H), 4.91 (*s*, 2H, HOD), 6.50 (*dd*,  $J = 5.7, 8.24$ , 1H), 6.88 (*d*,  $J = 5.5$ , 1H), 8.08 (*d*,  $J = 5.5$ , 1H), 8.40 (*s*, 1H), 8.56 (*s*, 1H).  $^{13}\text{C}$ -NMR ( $\text{CD}_3\text{OD}$ , 125 MHz): 37.22, 41.44 (2 x Me), 64.07, 73.59, 87.79, 90.17, 104.25, 113.37, 145.73. HRCI-MS: calcd. for  $\text{C}_{14}\text{H}_{19}\text{N}_5\text{O}_3$  ( $\text{M}+\text{H}$ ) $^+$  306.1566, obsd. 306.1563.

**1-Deaza-5'-O-(4,4'-dimethoxytrityl)-N<sup>6</sup>-(N,N-dimethylaminomethylene)-2'-deoxyadenosine (3)**

A stirred solution of the imine **2** (0.1 g, 0.33 mmol) in THF (3 mL), was treated with  $\text{C}_5\text{H}_5\text{N}$  (0.16 mL, 1.97 mmol) and trityl chloride (0.13 g, 0.36 mmol). After 3 min.,  $\text{AgNO}_3$  (0.06 g, 0.36 mmol) was added. The reaction solution acquired a pale orange color. Precipitation was observed after ten minutes. TLC ( $\text{CH}_2\text{Cl}_2$  / MeOH /  $\text{NEt}_3$  19:1:0.01) revealed complete disappearance of imine **2** after 16h. The suspension was passed through *Celite*, and the residue was washed with AcOEt (100 mL). The filtrate was washed with satd. aq.  $\text{NaHCO}_3$  (20 mL), brine (20 mL), dried (anhyd.  $\text{Na}_2\text{SO}_4$ ) and concentrated. FC ( $\text{CH}_2\text{Cl}_2$  / MeOH /  $\text{NEt}_3$  24:1:0.01) gave trityl derivative **3** (0.13 g, 67%). Pale yellow glass.  $R_f$  ( $\text{CH}_2\text{Cl}_2$  / MeOH /  $\text{NEt}_3$  19:1:0.01) 0.31.  $^1\text{H}$ -NMR ( $\text{CD}_3\text{OD}$ , 300 MHz): 2.48-2.56 (*m*, 1H), 2.82-2.91 (*m*, 1H), 3.09 (*s*, 3H), 3.11 (*s*, 3H), 3.27-3.30 (*m*, 1H), 3.71 (*s*, 6H), 4.03-4.12 (*m*, 1H), 4.49-4.64 (*m*, 1H), 4.93 (*s*, 1H, HOD), 6.53 (*t*,  $J = 6.4$ , 1H), 6.71-6.75 (*m*, 4H), 6.84 (*d*,  $J = 5.5$ , 1H), 7.12-7.24 (*m*, 7H), 7.33-7.36 (*m*, 2H), 8.08 (*d*,  $J = 5.5$ , 1H), 8.28 (*s*, 1H), 8.47 (*s*, 1H).  $^{13}\text{C}$ -NMR ( $\text{CD}_3\text{OD}$ , 75 MHz): 34.91, 41.20, 41.33, 55.82, 65.26, 72.87, 79.63, 85.70, 87.75, 87.94, 113.44, 114.18, 127.94, 128.89, 129.46, 130.28, 131.36, 131.46, 137.26, 141.87, 146.35, 146.43, 148.84, 152.43, 159.83, 160.21, 160.23. EI-MS:  $m/z$  (relative intensity) 608.3 ( $[\text{M}+1]^+$ , 13), 307.1 (15), 306.1 (100), 305.1 (34), 304.1 (16), 303 (44), 197.1 (34).

**1-Deaza-5'-O-(4,4'-dimethoxytrityl)-N<sup>6</sup>-(N,N-dimethylaminomethylene)-2'-deoxyadenosine-3'-O-[2-cyanoethyl]-N,N-diisopropylphosphoramidite] (4)**

A stirred solution of compound **3** (82 mg, 0.135 mmol) and N,N'-diisopropyl ethyl amine (0.074 mL, 0.81 mmol) in THF (4 mL) was treated with 2-cyanoethyl diisopropylchlorophosphoramidite (0.071 mL, 0.27 mmol). Precipitation was observed in 20 minutes. After 12h, TLC (CH<sub>2</sub>Cl<sub>2</sub> / MeOH / NEt<sub>3</sub> 19:1:0.01) revealed disappearance of **3**, and formation of relatively non-polar spots. The suspension was diluted with AcOEt (50 mL), washed with satd. aq. NaHCO<sub>3</sub> (10 mL), brine (10 mL); the organic layer was separated, dried (anhyd. Na<sub>2</sub>SO<sub>4</sub>), filtered and concentrated. FC (AcOEt / MeOH / NEt<sub>3</sub> 97:3:0.01) gave phosphoramidite diastereomers **4** (69 mg, 63%). Pale yellow oil. R<sub>f</sub> (CH<sub>2</sub>Cl<sub>2</sub> / MeOH / NEt<sub>3</sub> 97:3:0.01) 0.28, 0.29; (CH<sub>3</sub>CN / H<sub>2</sub>O 9:1) 0.45). <sup>1</sup>H-NMR (CD<sub>2</sub>Cl<sub>2</sub>, 300 MHz): 1.01-1.18 (*m*), 1.35 (*d*, *J* = 6.6 Hz), 2.39 (*m*), 2.51-2.68 (*m*), 2.78-2.87 (*m*), 3.03 (*s*), 3.17-3.79 (*m*), 3.67 (*s*), 3.91-4.21 (*m*), 4.62-4.69 (*m*), 5.23-5.25 (*m*), 5.76 (*s*), 6.44 (*t*, 6.6 Hz), 6.65-6.73 (*m*), 7.10-7.23 (*m*), 7.30-7.35 (*m*), 7.89-7.98 (*m*). <sup>31</sup>P NMR (121 MHz, CD<sub>2</sub>Cl<sub>2</sub>): 149.10. HRFAB-MS: calcd. for C<sub>44</sub>H<sub>54</sub>N<sub>7</sub>O<sub>6</sub>P (M+H)<sup>+</sup> 808.3951, obsd. 808.3911.

#### 4. Oligonucleotide Synthesis

Oligonucleotides were synthesized at the University of Utah Medical School core facility. Oligonucleotides are purified via HPLC on a Beckman Gold Nouveau system using ion-exchange chromatography with a Waters AP1 DEAE 8HR column. The following duplex was used for MutY base excision assays:

5'-CGA TCA TGG AGC CAC (**OG**)AG CTC CCG TTA CAG-3'

3'-GCT AGT ACC TCG GTG (**Y**)TC GAG GGC AAT GTC-5',

where Y = adenine analog, e.g. Z1 and OG = 8-oxoguanine.

## 5. MutY Cleavage Assays

MutY enzyme purification and glycosylase assays were performed as previously described (Francis, A. W.; Helquist, S. A.; Kool, E. T.; David, S. S. *J. Am. Chem. Soc.* **2003**, *125*, 16235-16242). Gels from cleavage assays were quantitated via storage phosphor autoradiography using ImageQuant software to generate plots of product formed as a function of time. The resulting data was fit to a single-exponential to determine  $k_{\text{obs}}$ . In these experiments, under single-turnover with base-quenching  $k_{\text{obs}} = k_g$ , as illustrated in the scheme below.

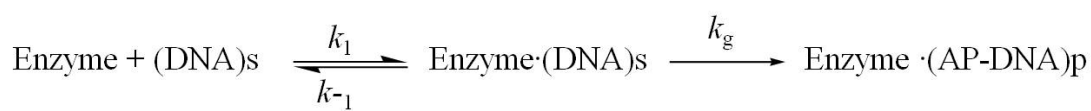

**Scheme S2.** Kinetic scheme for glycosylase activities of MutY

## 6. Acid-Catalyzed Depurination reactions.

A modified Maxam-Gilbert G+A sequencing reaction was performed as previously described (Francis, A. W.; Helquist, S. A.; Kool, E. T.; David, S. S. *J. Am. Chem. Soc.* **2003**, *125*, 16235-16242). The X-containing DNA strand where X= **A**, **Z1**, or **Z3** at position 15 of the oligonucleotide sequence above was 5'-<sup>32</sup>P labeled as described above. A solution of 25  $\mu\text{L}$  final volume containing 32 nM DNA, 0.1 M piperidine, 13.2 % formic acid, and 1.2 mM calf thymus DNA was incubated at 37 °C for 30 min. The reaction was quenched with the addition of 225  $\mu\text{L}$  of a stop solution (0.3 M sodium acetate, pH 7, 0.1mM EDTA, 76 mM calf thymus DNA). The DNA stands were ethanol precipitated (3X), dried in vacuo, followed by the addition of 1.0 M piperidine. The mixture was incubated at 90°C for 45 min and dried in vacuo with several washes with ddH<sub>2</sub>O. The samples were then electrophoresed on a 15% polyacrylamide gel for 4 h at 900 V. Bands were quantified using storage phosphor autoradiography.

## 7. Full References from Manuscript

Reference number refer to reference number in manuscript.

(44) Gaussian 03, *Revision E.01*, Frisch, M. J.; Trucks, G. W.; Schlegel, H. B.; Scuseria, G. E.; Robb, M. A.; Cheeseman, J. R.; Montgomery, Jr., J. A.; Vreven, T.; Kudin, K. N.; Burant, J. C.; Millam, J. M.; Iyengar, S. S.; Tomasi, J.; Barone, V.; Mennucci, B.; Cossi, M.; Scalmani, G.; Rega, N.; Petersson, G. A.; Nakatsuji, H.; Hada, M.; Ehara, M.; Toyota, K.; Fukuda, R.; Hasegawa, J.; Ishida, M.; Nakajima, T.; Honda, Y.; Kitao, O.; Nakai, H.; Klene, M.; Li, X.; Knox, J. E.; Hratchian, H. P.; Cross, J. B.; Bakken, V.; Adamo, C.; Jaramillo, J.; Gomperts, R.; Stratmann, R. E.; Yazyev, O.; Austin, A. J.; Cammi, R.; Pomelli, C.; Ochterski, J. W.; Ayala, P. Y.; Morokuma, K.; Voth, G. A.; Salvador, P.; Dannenberg, J. J.; Zakrzewski, V. G.; Dapprich, S.; Daniels, A. D.; Strain, M. C.; Farkas, O.; Malick, D. K.; Rabuck, A. D.; Raghavachari, K.; Foresman, J. B.; Ortiz, J. V.; Cui, Q.; Baboul, A. G.; Clifford, S.; Cioslowski, J.; Stefanov, B. B.; Liu, G.; Liashenko, A.; Piskorz, P.; Komaromi, I.; Martin, R. L.; Fox, D. J.; Keith, T.; Al-Laham, M. A.; Peng, C. Y.; Nanayakkara, A.; Challacombe, M.; Gill, P. M. W.; Johnson, B.; Chen, W.; Wong, M. W.; Gonzalez, C.; and Pople, J. A.; Gaussian, Inc., Wallingford CT, 2004.

(45) Gaussian 09, *Revision A.02*, Frisch, M. J.; Trucks, G. W.; Schlegel, H. B.; Scuseria, G. E.; Robb, M. A.; Cheeseman, J. R.; Scalmani, G.; Barone, V.; Mennucci, B.; Petersson, G. A.; Nakatsuji, H.; Caricato, M.; Li, X.; Hratchian, H. P.; Izmaylov, A. F.; Bloino, J.; Zheng, G.; Sonnenberg, J. L.; Hada, M.; Ehara, M.; Toyota, K.; Fukuda, R.; Hasegawa, J.; Ishida, M.; Nakajima, T.; Honda, Y.; Kitao, O.; Nakai, H.; Vreven, T.; Montgomery, Jr., J. A.; Peralta, J. E.; Ogliaro, F.; Bearpark, M.; Heyd, J. J.; Brothers, E.; Kudin, K. N.; Staroverov, V. N.; Kobayashi, R.; Normand, J.; Raghavachari, K.; Rendell, A.; Burant, J. C.; Iyengar, S. S.; Tomasi, J.; Cossi, M.; Rega, N.; Millam, N. J.; Klene, M.; Knox, J. E.; Cross, J. B.; Bakken, V.; Adamo, C.; Jaramillo, J.; Gomperts, R.; Stratmann, R. E.; Yazyev, O.; Austin, A. J.; Cammi, R.; Pomelli, C.; Ochterski, J. W.; Martin, R. L.; Morokuma, K.; Zakrzewski, V. G.; Voth, G. A.; Salvador, P.; Dannenberg, J. J.; Dapprich, S.; Daniels, A. D.; Farkas, Ö.; Foresman, J. B.; Ortiz, J. V.; Cioslowski, J.; Fox, D. J. Gaussian, Inc., Wallingford CT, 2009.

## 8. Cooks kinetic method

**Figure S3.** Plots for all Cooks kinetic method measurements

Z1 acidity

Trial 1

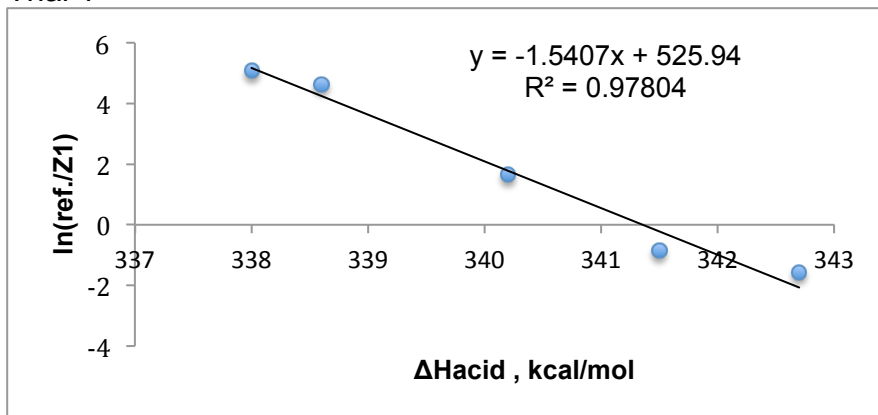

Trial 2

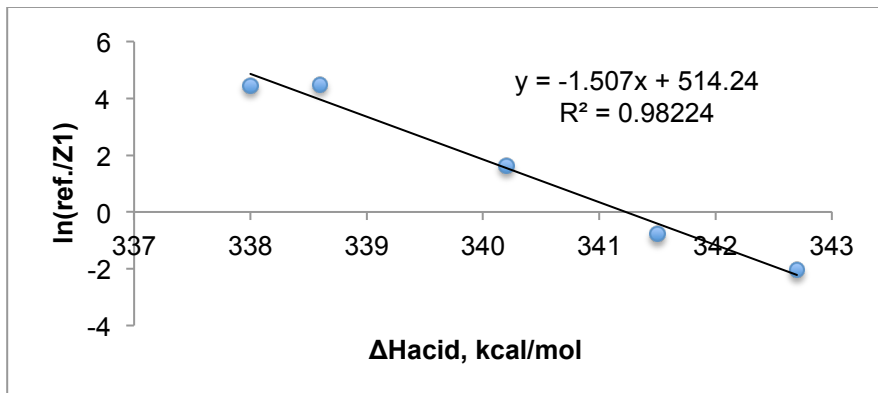

Trial 3

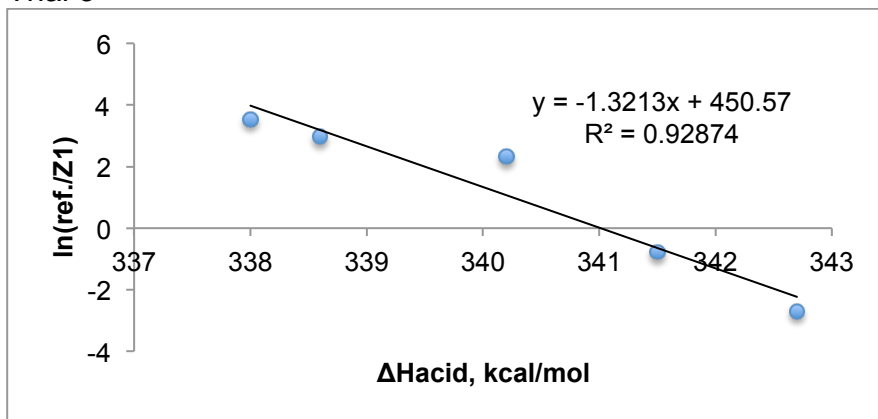

|         | slope   | intercept | Teff, K | $\Delta H_{\text{acid}}$ , kcal/mol |
|---------|---------|-----------|---------|-------------------------------------|
| trial 1 | -1.5407 | 525.94    | 327     | 341.4                               |
| trial 2 | -1.507  | 514.24    | 334     | 341.2                               |
| trial 3 | -1.3213 | 450.57    | 381     | 341.0                               |
| average |         |           | 347     | 341.2                               |



Z1 PA  
Trial 1

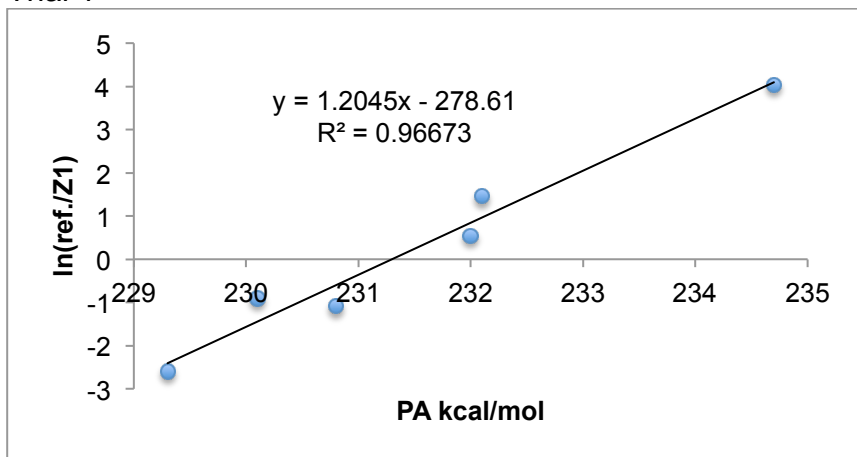

Trial 2

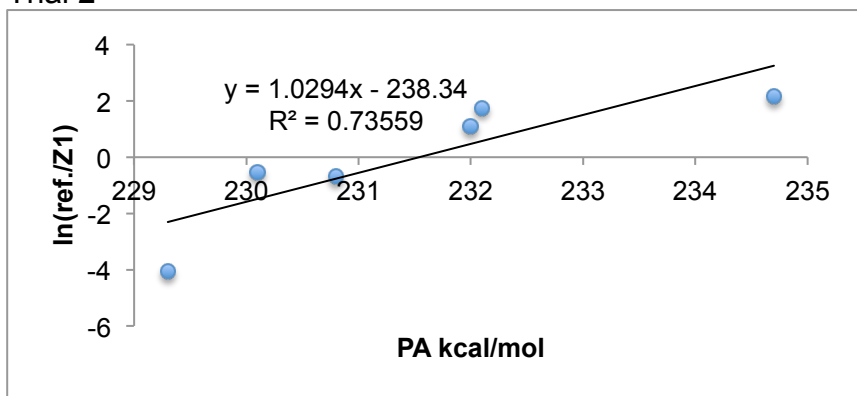

Trial 3

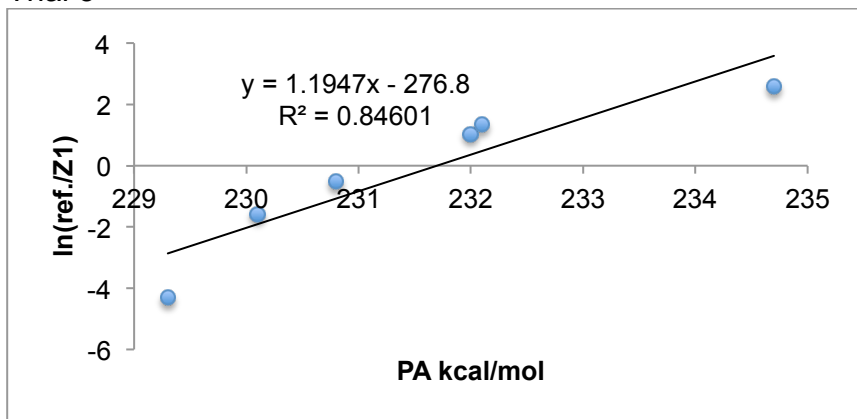

|         | slope  | intercept | Teff, K | PA,<br>kcal/mol |
|---------|--------|-----------|---------|-----------------|
| trial 1 | 1.2045 | -278.61   | 418     | 231.3           |
| trial 2 | 1.0294 | -238.35   | 489     | 231.5           |
| trial 3 | 1.1947 | -276.8    | 421     | 231.7           |
| average |        |           | 443     | 231.5           |

M acidity

Trial 1

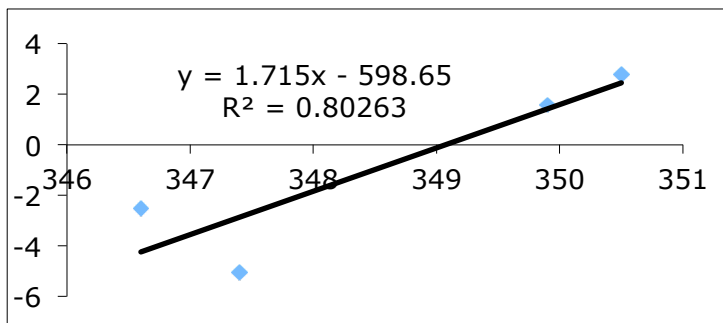

Trial 2

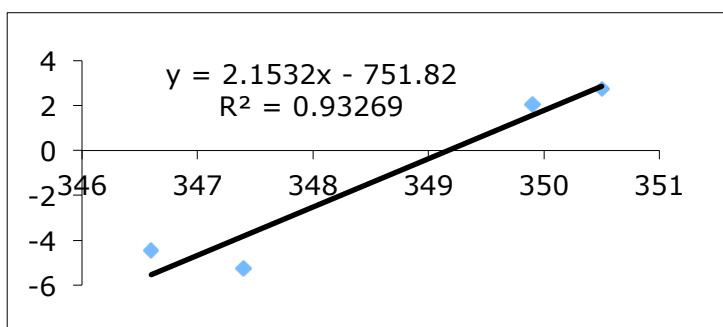

Trial 3

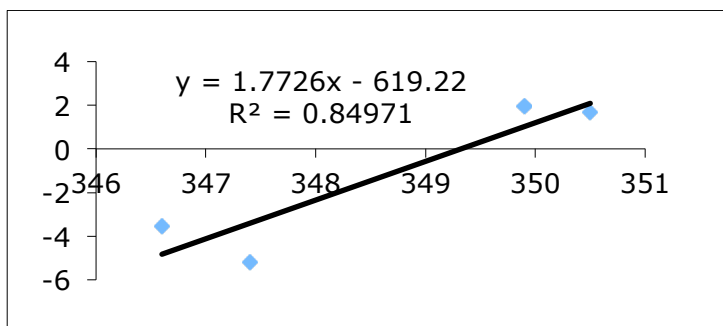

|         | Slope  | Intercept | Teff  | $\Delta H_{acid}$ ,<br>kcal/mol |
|---------|--------|-----------|-------|---------------------------------|
| Trial 1 | 1.715  | -598.65   | 293.5 | 349.1                           |
| Trial 2 | 2.1532 | -751.82   | 233.7 | 349.2                           |
| Trial 3 | 1.7726 | -619.22   | 283.9 | 349.3                           |
| Average |        |           | 270   | 349.2                           |

## 9. Cartesian coordinates and energies (in Hartree) for species calculated

Figure S2. Structures for species calculated

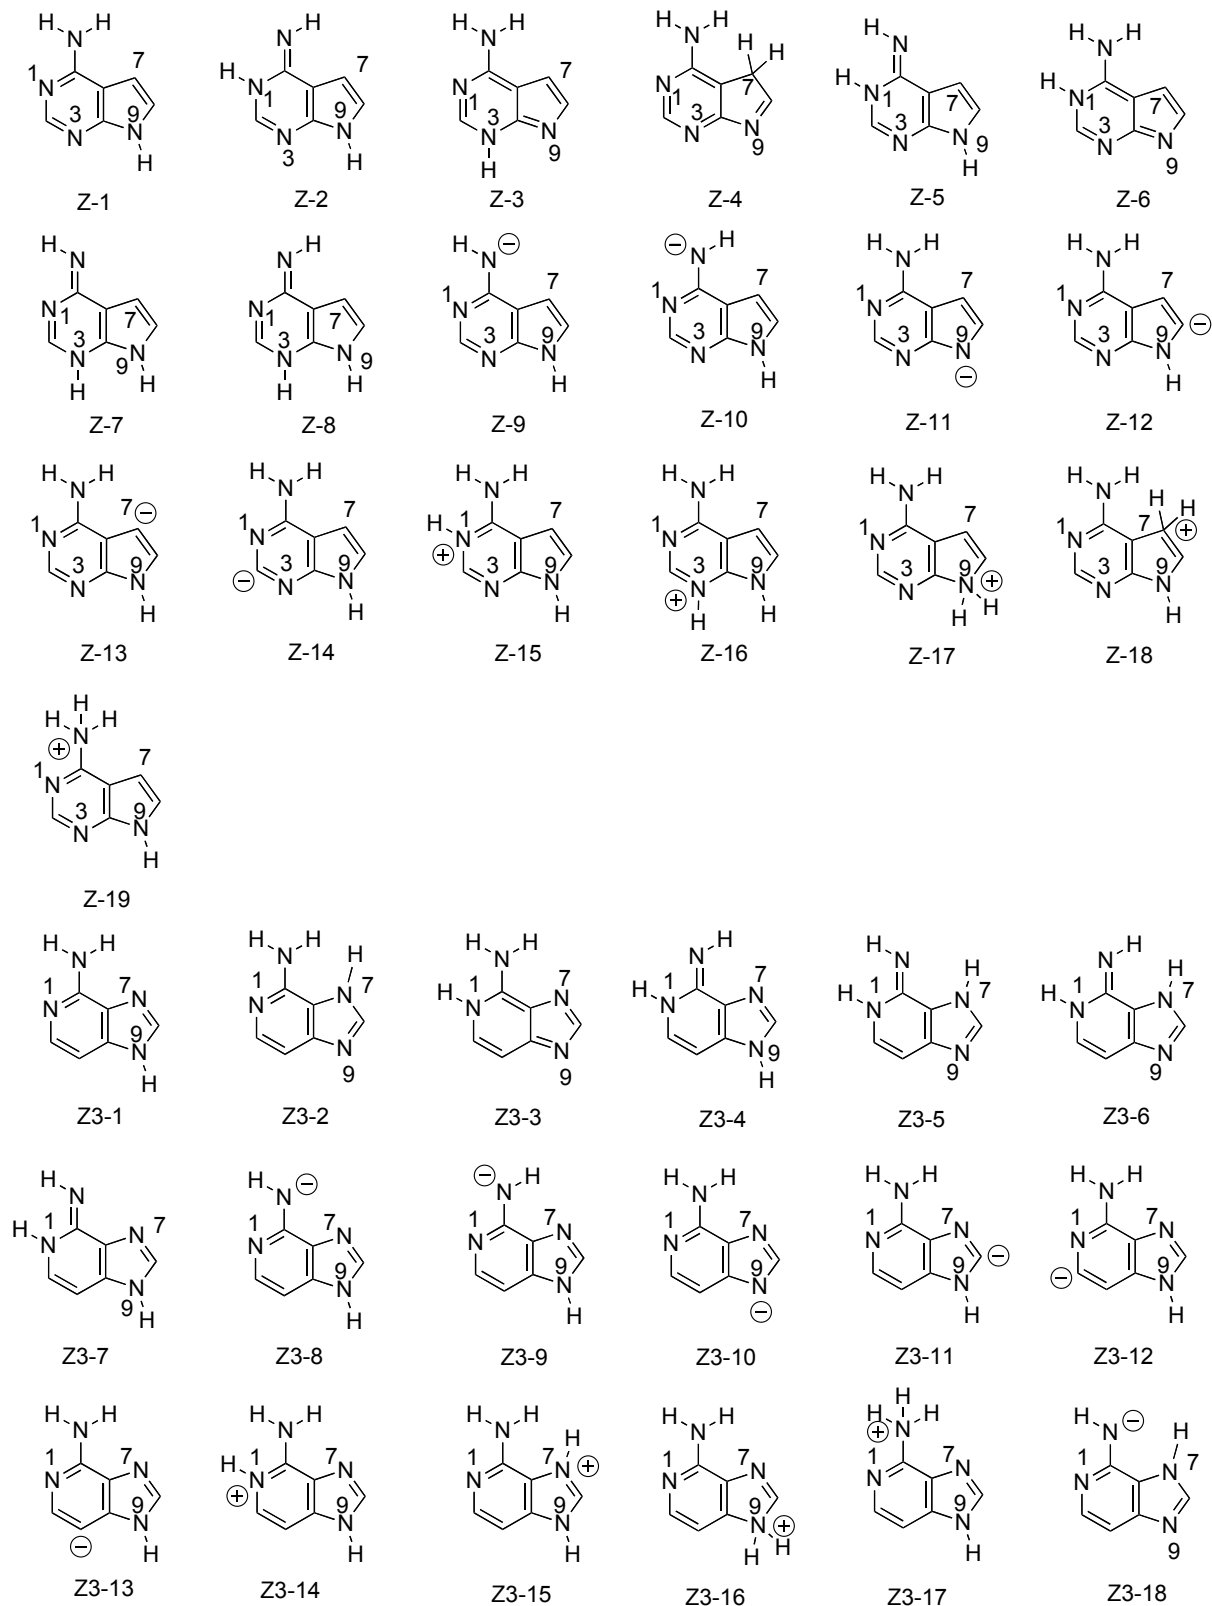

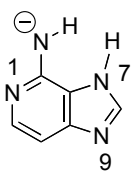

Z3-19

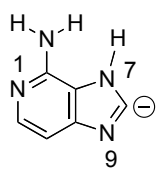

Z3-20

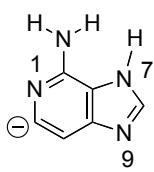

Z3-21

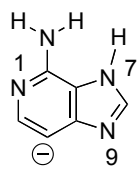

Z3-22

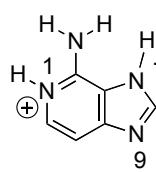

Z3-23

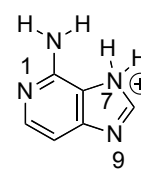

Z3-24

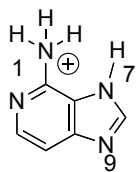

Z3-25

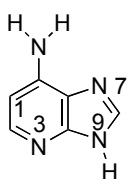

Z1-1

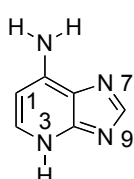

Z1-2

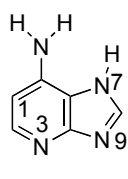

Z1-3

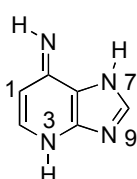

Z1-4

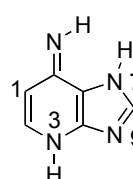

Z1-5

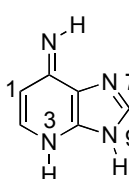

Z1-6

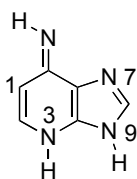

Z1-7

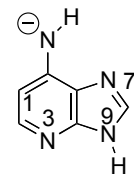

Z1-8

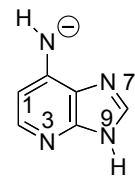

Z1-9

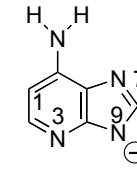

Z1-10

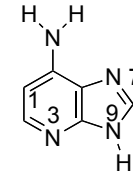

Z1-11

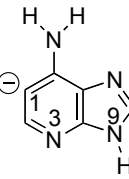

Z1-12

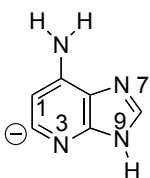

Z1-13

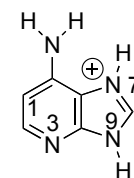

Z1-14

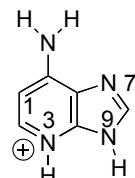

Z1-15

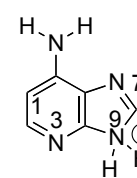

Z1-16

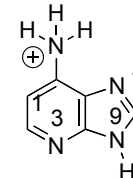

Z1-17

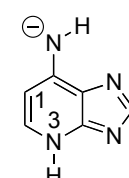

Z1-18

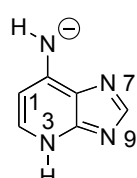

Z1-19

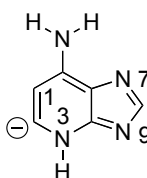

Z1-20

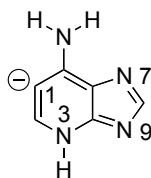

Z1-21

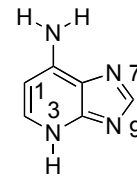

Z1-22

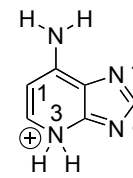

Z1-23

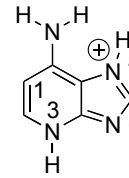

Z1-24

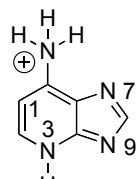

Z1-25

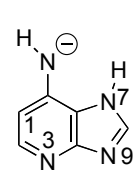

Z1-26

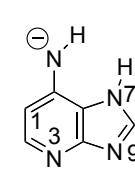

Z1-27

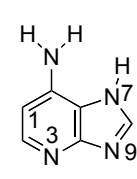

Z1-28

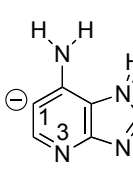

Z1-29

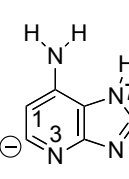

Z1-30

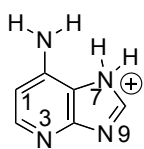

Z1-31

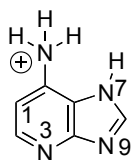

Z1-32

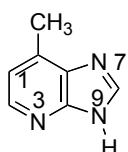

Q-1

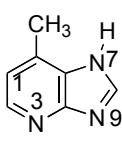

Q-2

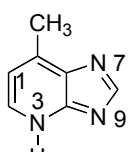

Q-3

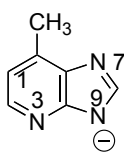

Q-4

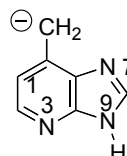

Q-5

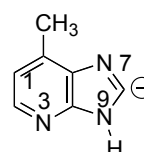

Q-6

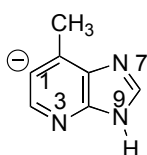

Q-7

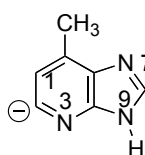

Q-8

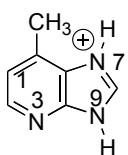

Q-9

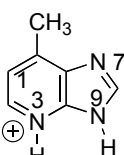

Q-10

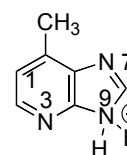

Q-11

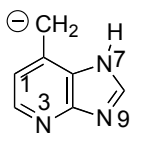

Q-12

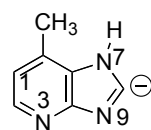

Q-13

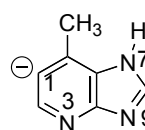

Q-14

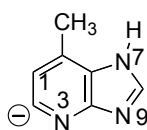

Q-15

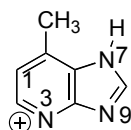

Q-16

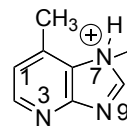

Q-17

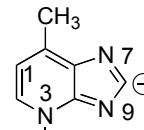

Q-18

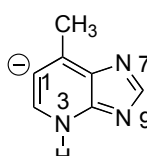

Q-19

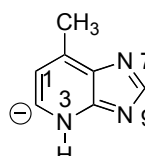

Q-20

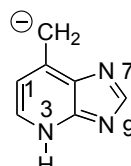

Q-21

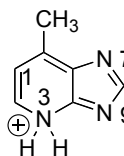

Q-22

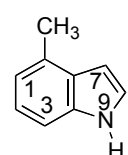

M-1

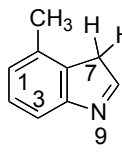

M-2

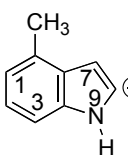

M-3

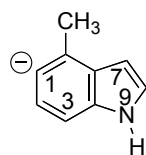

M-4

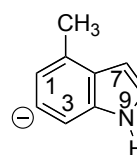

M-5

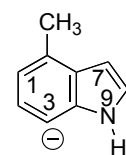

M-6

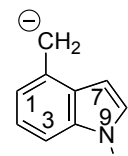

M-7

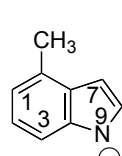

M-8

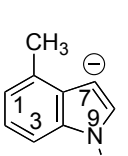

M-9

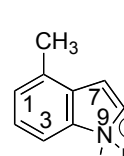

M-10

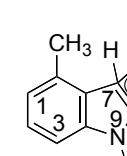

M-11

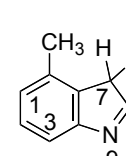

M-12

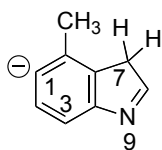

M-13

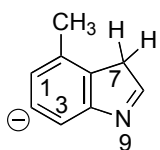

M-14

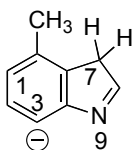

M-15

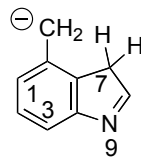

M-16

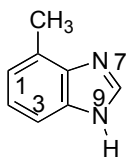

B-1

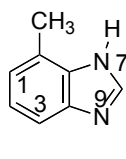

B-2

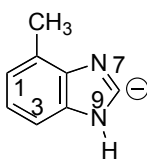

B-3

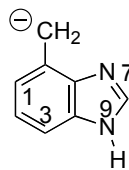

B-4

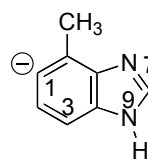

B-5

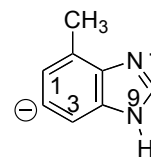

B-6

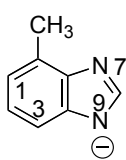

B-7

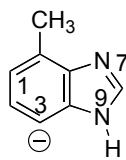

B-8

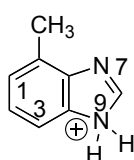

B-9

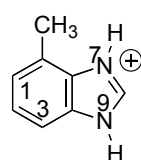

B-10

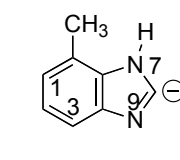

B-11

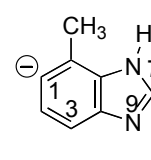

B-12

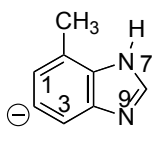

B-13

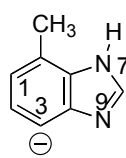

B-14

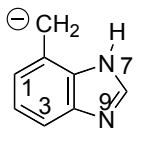

B-15

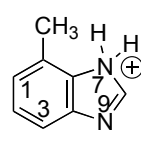

B-16

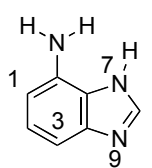

Z13-1

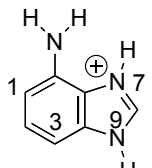

Z13-2

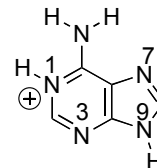

A-1

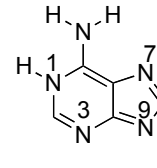

A-2

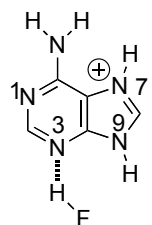

A-N3HF-1

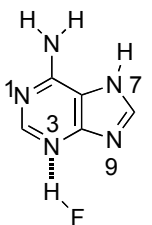

A-N3HF-2

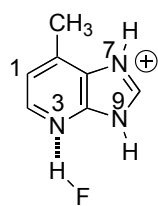

Q-N3HF-1

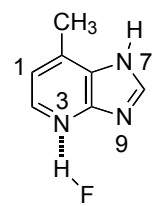

Q-N3HF-2

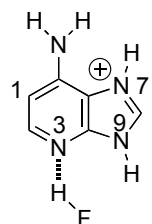

Z1-N3HF-1

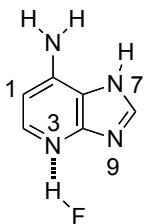

Z1-N3HF-2

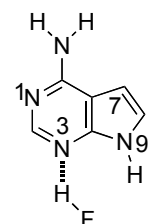

Z-N3HF-1

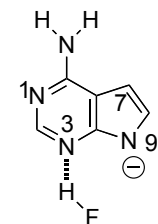

Z-N3HF-2

**Note:** Structure numbers in the section below correlate to structures shown on pages S19-S22 of SI, not to structures in the paper.

**Z (7-deazaadenine): neutral, protonated and deprotonated species**

**Amino N9H Z (Z-1) B3LYP/6-31+G(d)**

SCF Done: E(RB+HF-LYP) = -451.290219726 A.U.

Zero-point correction= 0.123731  
 (Hartree/Particle)  
 Thermal correction to Energy= 0.131087  
 Thermal correction to Enthalpy= 0.132031  
 Thermal correction to Gibbs Free Energy= 0.092037  
 Sum of electronic and zero-point Energies= -451.166489  
 Sum of electronic and thermal Energies= -451.159133  
 Sum of electronic and thermal Enthalpies= -451.158189  
 Sum of electronic and thermal Free Energies= -451.198183

|       | E (Thermal) | CV             | S              |
|-------|-------------|----------------|----------------|
|       | KCal/Mol    | Cal/Mol-Kelvin | Cal/Mol-Kelvin |
| Total | 82.258      | 29.915         | 84.175         |

| Center Number | Atomic Number | Atomic Type | Coordinates (Angstroms) |           |           |
|---------------|---------------|-------------|-------------------------|-----------|-----------|
|               |               |             | X                       | Y         | Z         |
| 1             | 6             | 0           | 0.162259                | 0.548532  | -0.006252 |
| 2             | 6             | 0           | 0.699802                | -0.758058 | 0.004302  |
| 3             | 6             | 0           | -1.310938               | -1.702866 | -0.002393 |
| 4             | 6             | 0           | -1.250566               | 0.603028  | -0.005181 |
| 5             | 6             | 0           | 1.268115                | 1.466120  | -0.010426 |
| 6             | 6             | 0           | 2.409467                | 0.702070  | -0.000596 |
| 7             | 1             | 0           | -1.937185               | -2.591843 | -0.003426 |
| 8             | 1             | 0           | 1.238549                | 2.547409  | -0.029543 |
| 9             | 1             | 0           | 3.447643                | 1.003173  | -0.002830 |
| 10            | 7             | 0           | -1.969353               | -0.529419 | -0.002996 |
| 11            | 7             | 0           | 0.005674                | -1.905886 | 0.005102  |
| 12            | 7             | 0           | -1.944807               | 1.785442  | -0.049547 |
| 13            | 1             | 0           | -2.934760               | 1.718991  | 0.151123  |
| 14            | 1             | 0           | -1.486259               | 2.630870  | 0.259575  |
| 15            | 7             | 0           | 2.065722                | -0.641053 | 0.009709  |
| 16            | 1             | 0           | 2.702533                | -1.425146 | 0.012500  |

**N1H-N9H-imino\_N7side Z (Z-2) B3LYP/6-31+G(d)**

SCF Done: E(RB+HF-LYP) = -451.273176261 A.U.

Zero-point correction= 0.124050  
 (Hartree/Particle)  
 Thermal correction to Energy= 0.131188  
 Thermal correction to Enthalpy= 0.132133  
 Thermal correction to Gibbs Free Energy= 0.092384  
 Sum of electronic and zero-point Energies= -451.149126  
 Sum of electronic and thermal Energies= -451.141988  
 Sum of electronic and thermal Enthalpies= -451.141044

Sum of electronic and thermal Free Energies= -451.180793

|       | E (Thermal)<br>KCal/Mol | CV<br>Cal/Mol-Kelvin | S<br>Cal/Mol-Kelvin |
|-------|-------------------------|----------------------|---------------------|
| Total | 82.322                  | 29.081               | 83.658              |

| Center<br>Number | Atomic<br>Number | Atomic<br>Type | Coordinates (Angstroms) |           |           |
|------------------|------------------|----------------|-------------------------|-----------|-----------|
|                  |                  |                | X                       | Y         | Z         |
| 1                | 6                | 0              | 0.214357                | 0.575425  | -0.000185 |
| 2                | 6                | 0              | 0.640139                | -0.758074 | -0.000055 |
| 3                | 6                | 0              | -1.407678               | -1.622155 | -0.000141 |
| 4                | 6                | 0              | -1.209360               | 0.843587  | -0.000027 |
| 5                | 6                | 0              | 1.384282                | 1.394643  | -0.000264 |
| 6                | 6                | 0              | 2.468012                | 0.543536  | 0.000049  |
| 7                | 1                | 0              | -2.125067               | -2.438531 | 0.000510  |
| 8                | 1                | 0              | 1.432329                | 2.475369  | -0.000143 |
| 9                | 1                | 0              | 3.527289                | 0.756407  | 0.000350  |
| 10               | 7                | 0              | -1.943661               | -0.367076 | -0.000099 |
| 11               | 7                | 0              | -0.133362               | -1.887585 | 0.000046  |
| 12               | 7                | 0              | -1.890488               | 1.936697  | 0.000235  |
| 13               | 7                | 0              | 2.007149                | -0.761182 | 0.000153  |
| 14               | 1                | 0              | 2.572383                | -1.598720 | 0.000295  |
| 15               | 1                | 0              | -1.271495               | 2.747603  | 0.000363  |
| 16               | 1                | 0              | -2.951419               | -0.249877 | 0.000021  |

### Amino N3H Z (Z-3) B3LYP/6-31+G(d)

SCF Done: E(RB+HF-LYP) = -451.271763751 A.U.

|                                              |             |
|----------------------------------------------|-------------|
| Zero-point correction=                       | 0.123374    |
| (Hartree/Particle)                           |             |
| Thermal correction to Energy=                | 0.130825    |
| Thermal correction to Enthalpy=              | 0.131769    |
| Thermal correction to Gibbs Free Energy=     | 0.091543    |
| Sum of electronic and zero-point Energies=   | -451.148390 |
| Sum of electronic and thermal Energies=      | -451.140939 |
| Sum of electronic and thermal Enthalpies=    | -451.139994 |
| Sum of electronic and thermal Free Energies= | -451.180221 |

|       | E (Thermal)<br>KCal/Mol | CV<br>Cal/Mol-Kelvin | S<br>Cal/Mol-Kelvin |
|-------|-------------------------|----------------------|---------------------|
| Total | 82.094                  | 30.034               | 84.663              |

| Center<br>Number | Atomic<br>Number | Atomic<br>Type | Coordinates (Angstroms) |           |           |
|------------------|------------------|----------------|-------------------------|-----------|-----------|
|                  |                  |                | X                       | Y         | Z         |
| 1                | 6                | 0              | -0.211947               | -0.581834 | -0.004782 |
| 2                | 6                | 0              | -0.794053               | 0.730173  | 0.001939  |
| 3                | 6                | 0              | 1.382511                | 1.635521  | -0.000746 |
| 4                | 6                | 0              | 1.185709                | -0.665808 | -0.004330 |
| 5                | 6                | 0              | -1.344047               | -1.450913 | -0.004697 |
| 6                | 6                | 0              | -2.444585               | -0.600602 | 0.001331  |
| 7                | 1                | 0              | 1.998369                | 2.529664  | 0.002090  |
| 8                | 1                | 0              | -1.358662               | -2.533465 | -0.016381 |



|    |   |   |           |           |           |
|----|---|---|-----------|-----------|-----------|
| 9  | 1 | 0 | -3.489629 | -0.889348 | 0.001342  |
| 10 | 7 | 0 | 1.964548  | 0.458909  | -0.001328 |
| 11 | 7 | 0 | 0.043374  | 1.822692  | 0.002293  |
| 12 | 7 | 0 | 1.867988  | -1.844497 | -0.037403 |
| 13 | 1 | 0 | 2.864745  | -1.814185 | 0.128078  |
| 14 | 1 | 0 | 1.385949  | -2.708434 | 0.162152  |
| 15 | 7 | 0 | -2.116503 | 0.743146  | 0.005578  |
| 16 | 1 | 0 | -0.358150 | 2.754794  | 0.006443  |

**Amino C7H Z (Z-4) B3LYP/6-31+G(d)**

SCF Done: E(RB+HF-LYP) = -451.267779609 A.U.

Zero-point correction= 0.122450  
(Hartree/Particle)  
Thermal correction to Energy= 0.129846  
Thermal correction to Enthalpy= 0.130790  
Thermal correction to Gibbs Free Energy= 0.090595  
Sum of electronic and zero-point Energies= -451.145330  
Sum of electronic and thermal Energies= -451.137933  
Sum of electronic and thermal Enthalpies= -451.136989  
Sum of electronic and thermal Free Energies= -451.177185

|       | E (Thermal)<br>KCal/Mol | CV<br>Cal/Mol-Kelvin | S<br>Cal/Mol-Kelvin |
|-------|-------------------------|----------------------|---------------------|
| Total | 81.480                  | 29.480               | 84.599              |

| Center<br>Number | Atomic<br>Number | Atomic<br>Type | Coordinates (Angstroms) |           |           |
|------------------|------------------|----------------|-------------------------|-----------|-----------|
|                  |                  |                | X                       | Y         | Z         |
| 1                | 6                | 0              | 0.176703                | 0.494695  | -0.002446 |
| 2                | 6                | 0              | 0.683198                | -0.808934 | -0.005987 |
| 3                | 6                | 0              | -1.374408               | -1.667075 | 0.001049  |
| 4                | 6                | 0              | -1.216000               | 0.626324  | 0.002510  |
| 5                | 6                | 0              | 1.348887                | 1.429497  | 0.007847  |
| 6                | 6                | 0              | 2.476191                | 0.411433  | 0.002370  |
| 7                | 7                | 0              | -1.988938               | -0.480798 | 0.002206  |
| 8                | 7                | 0              | -0.057519               | -1.917299 | -0.004441 |
| 9                | 7                | 0              | -1.866784               | 1.834618  | 0.054756  |
| 10               | 7                | 0              | 2.107533                | -0.822249 | -0.005983 |
| 11               | 1                | 0              | 3.529829                | 0.682792  | 0.004407  |
| 12               | 1                | 0              | 1.413395                | 2.091864  | -0.869066 |
| 13               | 1                | 0              | -2.028601               | -2.536073 | 0.001709  |
| 14               | 1                | 0              | -1.382504               | 2.665757  | -0.253991 |
| 15               | 1                | 0              | -2.860228               | 1.804966  | -0.138458 |
| 16               | 1                | 0              | 1.400641                | 2.075151  | 0.897568  |

**N1H-N9H-imino\_N1side Z (Z-5) B3LYP/6-31+G(d)**

SCF Done: E(RB+HF-LYP) = -451.267779676 A.U.

Zero-point correction= 0.123644  
(Hartree/Particle)  
Thermal correction to Energy= 0.130843

Thermal correction to Enthalpy= 0.131787  
 Thermal correction to Gibbs Free Energy= 0.091957  
 Sum of electronic and zero-point Energies= -451.144135  
 Sum of electronic and thermal Energies= -451.136937  
 Sum of electronic and thermal Enthalpies= -451.135993  
 Sum of electronic and thermal Free Energies= -451.175822

|       | E (Thermal)<br>KCal/Mol | CV<br>Cal/Mol-Kelvin | S<br>Cal/Mol-Kelvin |
|-------|-------------------------|----------------------|---------------------|
| Total | 82.105                  | 29.341               | 83.828              |

| Center<br>Number | Atomic<br>Number | Atomic<br>Type | Coordinates (Angstroms) |           |           |
|------------------|------------------|----------------|-------------------------|-----------|-----------|
|                  |                  |                | X                       | Y         | Z         |
| 1                | 6                | 0              | 0.212203                | 0.575591  | -0.000060 |
| 2                | 6                | 0              | 0.655128                | -0.750414 | -0.000021 |
| 3                | 6                | 0              | -1.380487               | -1.643472 | 0.000011  |
| 4                | 6                | 0              | -1.209082               | 0.839521  | -0.000019 |
| 5                | 6                | 0              | 1.365416                | 1.412914  | -0.000067 |
| 6                | 6                | 0              | 2.462019                | 0.578046  | 0.000025  |
| 7                | 1                | 0              | -2.089405               | -2.467655 | 0.000108  |
| 8                | 1                | 0              | 1.376611                | 2.493390  | -0.000036 |
| 9                | 1                | 0              | 3.518350                | 0.805693  | 0.000085  |
| 10               | 7                | 0              | -1.937057               | -0.387028 | -0.000015 |
| 11               | 7                | 0              | -0.106399               | -1.889863 | -0.000031 |
| 12               | 7                | 0              | -1.739666               | 2.012048  | 0.000062  |
| 13               | 7                | 0              | 2.022223                | -0.735173 | 0.000041  |
| 14               | 1                | 0              | 2.600221                | -1.563605 | 0.000157  |
| 15               | 1                | 0              | -2.948212               | -0.320657 | -0.000026 |
| 16               | 1                | 0              | -2.762453               | 1.979829  | 0.000100  |

### Amino N1H Z (Z-6) B3LYP/6-31+G(d)

SCF Done: E(RB+HF-LYP) = -451.253289134 A.U.

Zero-point correction= 0.122834  
 (Hartree/Particle)  
 Thermal correction to Energy= 0.130352  
 Thermal correction to Enthalpy= 0.131296  
 Thermal correction to Gibbs Free Energy= 0.090932  
 Sum of electronic and zero-point Energies= -451.130455  
 Sum of electronic and thermal Energies= -451.122937  
 Sum of electronic and thermal Enthalpies= -451.121993  
 Sum of electronic and thermal Free Energies= -451.162357

|       | E (Thermal)<br>KCal/Mol | CV<br>Cal/Mol-Kelvin | S<br>Cal/Mol-Kelvin |
|-------|-------------------------|----------------------|---------------------|
| Total | 81.797                  | 30.249               | 84.954              |

| Center<br>Number | Atomic<br>Number | Atomic<br>Type | Coordinates (Angstroms) |           |           |
|------------------|------------------|----------------|-------------------------|-----------|-----------|
|                  |                  |                | X                       | Y         | Z         |
| 1                | 6                | 0              | 0.234758                | 0.557444  | -0.013796 |
| 2                | 6                | 0              | 0.803282                | -0.791736 | -0.004720 |
| 3                | 6                | 0              | -1.248029               | -1.739006 | 0.003050  |

|    |   |   |           |           |           |
|----|---|---|-----------|-----------|-----------|
| 4  | 6 | 0 | -1.139300 | 0.678971  | -0.005310 |
| 5  | 6 | 0 | 1.358183  | 1.430749  | -0.002198 |
| 6  | 6 | 0 | 2.454160  | 0.574317  | 0.006832  |
| 7  | 1 | 0 | -1.934334 | -2.580752 | 0.007345  |
| 8  | 1 | 0 | 1.375817  | 2.513899  | -0.012379 |
| 9  | 1 | 0 | 3.498532  | 0.868227  | 0.011641  |
| 10 | 7 | 0 | -1.857349 | -0.490572 | -0.002694 |
| 11 | 7 | 0 | 0.032738  | -1.922136 | 0.006605  |
| 12 | 7 | 0 | -1.854924 | 1.860117  | -0.065225 |
| 13 | 1 | 0 | -2.723726 | 1.900616  | 0.457124  |
| 14 | 1 | 0 | -1.292158 | 2.691137  | 0.071095  |
| 15 | 7 | 0 | 2.131543  | -0.762599 | 0.010428  |
| 16 | 1 | 0 | -2.866511 | -0.451224 | -0.081783 |

**Amino N1H Z (Z-6) B3LYP/6-31+G(d) cpcm in water, RADII=UAKS**

Total free energy in solution:  
with all non electrostatic terms (a.u.) = -451.297065

---

|                            |              |        |
|----------------------------|--------------|--------|
| (Polarized solute)-Solvent | (kcal/mol) = | -38.87 |
| Cavitation energy          | (kcal/mol) = | 16.77  |
| Dispersion energy          | (kcal/mol) = | -20.87 |
| Repulsion energy           | (kcal/mol) = | 4.86   |
| Total non electrostatic    | (kcal/mol) = | 0.76   |

**N3H-N9H-imino\_N1side Z (Z-7) B3LYP/6-31+G(d)**

|                                              |             |
|----------------------------------------------|-------------|
| Zero-point correction=                       | 0.122520    |
| (Hartree/Particle)                           |             |
| Thermal correction to Energy=                | 0.130346    |
| Thermal correction to Enthalpy=              | 0.131291    |
| Thermal correction to Gibbs Free Energy=     | 0.090092    |
| Sum of electronic and zero-point Energies=   | -451.126130 |
| Sum of electronic and thermal Energies=      | -451.118304 |
| Sum of electronic and thermal Enthalpies=    | -451.117360 |
| Sum of electronic and thermal Free Energies= | -451.158558 |

|       | E (Thermal) | CV             | S              |
|-------|-------------|----------------|----------------|
|       | KCal/Mol    | Cal/Mol-Kelvin | Cal/Mol-Kelvin |
| Total | 81.794      | 30.530         | 86.709         |

| Center Number | Atomic Number | Atomic Type | Coordinates (Angstroms) |           |           |
|---------------|---------------|-------------|-------------------------|-----------|-----------|
|               |               |             | X                       | Y         | Z         |
| 1             | 6             | 0           | 0.200085                | 0.580385  | 0.000366  |
| 2             | 6             | 0           | 0.652107                | -0.726882 | 0.000303  |
| 3             | 6             | 0           | -1.563623               | -1.498074 | -0.000018 |
| 4             | 6             | 0           | -1.235504               | 0.842082  | 0.000074  |
| 5             | 6             | 0           | 1.364781                | 1.412297  | 0.000165  |
| 6             | 6             | 0           | 2.460771                | 0.585455  | -0.000133 |
| 7             | 1             | 0           | -2.220540               | -2.366736 | 0.000592  |
| 8             | 1             | 0           | 1.370114                | 2.492703  | 0.000174  |
| 9             | 1             | 0           | 3.518818                | 0.802903  | -0.000384 |
| 10            | 7             | 0           | -2.069784               | -0.314752 | 0.000007  |

|    |   |   |           |           |           |
|----|---|---|-----------|-----------|-----------|
| 11 | 7 | 0 | -0.215741 | -1.802109 | -0.000253 |
| 12 | 7 | 0 | -1.718356 | 2.033673  | -0.000230 |
| 13 | 1 | 0 | -2.740725 | 1.977696  | -0.000436 |
| 14 | 7 | 0 | 2.017027  | -0.739789 | -0.000158 |
| 15 | 1 | 0 | 2.613339  | -1.553849 | -0.000090 |
| 16 | 1 | 0 | 0.095266  | -2.763453 | 0.000049  |

---

**N3H-N9H-imino\_N7side Z (Z-8) B3LYP/6-31+G(d)**

SCF Done: E(RB+HF-LYP) = -451.242019836 A.U.

Zero-point correction= 0.122271  
(Hartree/Particle)  
Thermal correction to Energy= 0.130133  
Thermal correction to Enthalpy= 0.131077  
Thermal correction to Gibbs Free Energy= 0.089686  
Sum of electronic and zero-point Energies= -451.119749  
Sum of electronic and thermal Energies= -451.111887  
Sum of electronic and thermal Enthalpies= -451.110943  
Sum of electronic and thermal Free Energies= -451.152334

|       | E (Thermal) | CV             | S              |
|-------|-------------|----------------|----------------|
|       | KCal/Mol    | Cal/Mol-Kelvin | Cal/Mol-Kelvin |
| Total | 81.660      | 30.581         | 87.115         |

---

| Center Number | Atomic Number | Atomic Type | Coordinates (Angstroms) |           |           |
|---------------|---------------|-------------|-------------------------|-----------|-----------|
|               |               |             | X                       | Y         | Z         |
| 1             | 6             | 0           | 0.195555                | 0.571955  | -0.000095 |
| 2             | 6             | 0           | 0.629111                | -0.743314 | 0.000011  |
| 3             | 6             | 0           | -1.598628               | -1.473992 | 0.000015  |
| 4             | 6             | 0           | -1.244214               | 0.856300  | -0.000016 |
| 5             | 6             | 0           | 1.379652                | 1.381438  | -0.000088 |
| 6             | 6             | 0           | 2.461545                | 0.536244  | 0.000004  |
| 7             | 1             | 0           | -2.268023               | -2.333112 | 0.000168  |
| 8             | 1             | 0           | 1.426906                | 2.462092  | -0.000207 |
| 9             | 1             | 0           | 3.522724                | 0.736946  | 0.000113  |
| 10            | 7             | 0           | -2.085951               | -0.286908 | -0.000056 |
| 11            | 7             | 0           | -0.251505               | -1.803595 | -0.000195 |
| 12            | 7             | 0           | -1.817548               | 2.009682  | 0.000121  |
| 13            | 7             | 0           | 1.993498                | -0.778315 | 0.000176  |
| 14            | 1             | 0           | 2.575414                | -1.603108 | -0.000345 |
| 15            | 1             | 0           | 0.044708                | -2.769604 | 0.000797  |
| 16            | 1             | 0           | -1.109308               | 2.748949  | 0.000168  |

---

**N10-deprotonated N9H-amino(N10H\_N1side) Z (Z-9) B3LYP/6-31+G(d)**

SCF Done: E(RB+HF-LYP) = -450.717281219 A.U.

Zero-point correction= 0.109693  
(Hartree/Particle)  
Thermal correction to Energy= 0.116844  
Thermal correction to Enthalpy= 0.117789  
Thermal correction to Gibbs Free Energy= 0.077964

Sum of electronic and zero-point Energies= -450.607589  
 Sum of electronic and thermal Energies= -450.600437  
 Sum of electronic and thermal Enthalpies= -450.599493  
 Sum of electronic and thermal Free Energies= -450.639317

|       | E (Thermal)<br>KCal/Mol | CV<br>Cal/Mol-Kelvin | S<br>Cal/Mol-Kelvin |
|-------|-------------------------|----------------------|---------------------|
| Total | 73.321                  | 28.445               | 83.817              |

| Center<br>Number | Atomic<br>Number | Atomic<br>Type | Coordinates (Angstroms) |           |           |
|------------------|------------------|----------------|-------------------------|-----------|-----------|
|                  |                  |                | X                       | Y         | Z         |
| 1                | 6                | 0              | 0.168005                | 0.563154  | 0.000068  |
| 2                | 6                | 0              | 0.632034                | -0.758279 | -0.000077 |
| 3                | 6                | 0              | -1.426638               | -1.585280 | -0.000209 |
| 4                | 6                | 0              | -1.270017               | 0.770541  | 0.000068  |
| 5                | 6                | 0              | 1.315973                | 1.418260  | 0.000187  |
| 6                | 6                | 0              | 2.433550                | 0.609886  | 0.000112  |
| 7                | 7                | 0              | -2.035604               | -0.404002 | -0.000082 |
| 8                | 7                | 0              | -0.113923               | -1.890089 | -0.000222 |
| 9                | 7                | 0              | -1.802804               | 1.967964  | 0.000200  |
| 10               | 7                | 0              | 2.010571                | -0.718706 | -0.000049 |
| 11               | 1                | 0              | 2.595461                | -1.540306 | -0.000136 |
| 12               | 1                | 0              | 3.487624                | 0.854626  | 0.000158  |
| 13               | 1                | 0              | 1.306923                | 2.500454  | 0.000311  |
| 14               | 1                | 0              | -2.094408               | -2.451822 | -0.000321 |
| 15               | 1                | 0              | -2.820726               | 1.841194  | 0.000168  |

***N10-deprotonated N9H-amino (N10H\_N7side) Z (Z-10) B3LYP/6-31+G(d)***

SCF Done: E(RB+HF-LYP) = -450.710594177 A.U.

Zero-point correction= 0.109373  
 (Hartree/Particle)  
 Thermal correction to Energy= 0.116553  
 Thermal correction to Enthalpy= 0.117497  
 Thermal correction to Gibbs Free Energy= 0.077592  
 Sum of electronic and zero-point Energies= -450.601221  
 Sum of electronic and thermal Energies= -450.594041  
 Sum of electronic and thermal Enthalpies= -450.593097  
 Sum of electronic and thermal Free Energies= -450.633002

|       | E (Thermal)<br>KCal/Mol | CV<br>Cal/Mol-Kelvin | S<br>Cal/Mol-Kelvin |
|-------|-------------------------|----------------------|---------------------|
| Total | 73.138                  | 28.580               | 83.988              |

| Center<br>Number | Atomic<br>Number | Atomic<br>Type | Coordinates (Angstroms) |           |           |
|------------------|------------------|----------------|-------------------------|-----------|-----------|
|                  |                  |                | X                       | Y         | Z         |
| 1                | 6                | 0              | -0.160119               | 0.551738  | -0.000231 |
| 2                | 6                | 0              | -0.606125               | -0.777558 | -0.000251 |
| 3                | 6                | 0              | 1.465997                | -1.563863 | 0.000138  |
| 4                | 6                | 0              | 1.282197                | 0.782424  | -0.000007 |

|    |   |   |           |           |           |
|----|---|---|-----------|-----------|-----------|
| 5  | 6 | 0 | -1.326627 | 1.386155  | -0.000022 |
| 6  | 6 | 0 | -2.431338 | 0.559803  | 0.000413  |
| 7  | 7 | 0 | 2.057277  | -0.378258 | 0.000059  |
| 8  | 7 | 0 | 0.154908  | -1.894271 | 0.000032  |
| 9  | 7 | 0 | 1.881641  | 1.951787  | 0.000073  |
| 10 | 7 | 0 | -1.986113 | -0.759191 | -0.000211 |
| 11 | 1 | 0 | -2.557350 | -1.590773 | 0.000779  |
| 12 | 1 | 0 | -3.488641 | 0.789244  | -0.000316 |
| 13 | 1 | 0 | -1.357083 | 2.469768  | -0.000084 |
| 14 | 1 | 0 | 2.145447  | -2.421078 | -0.000124 |
| 15 | 1 | 0 | 1.159724  | 2.680168  | -0.000159 |

**N9-deprotonated N9H-amino Z (Z-11) B3LYP/6-31+G(d)**

SCF Done: E(RB+HF-LYP) = -450.731170139 A.U.

Zero-point correction= 0.110010  
(Hartree/Particle)  
Thermal correction to Energy= 0.117025  
Thermal correction to Enthalpy= 0.117969  
Thermal correction to Gibbs Free Energy= 0.078514  
Sum of electronic and zero-point Energies= -450.621160  
Sum of electronic and thermal Energies= -450.614146  
Sum of electronic and thermal Enthalpies= -450.613201  
Sum of electronic and thermal Free Energies= -450.652656

|       | E (Thermal) | CV             | S              |
|-------|-------------|----------------|----------------|
|       | KCal/Mol    | Cal/Mol-Kelvin | Cal/Mol-Kelvin |
| Total | 73.434      | 28.260         | 83.038         |

| Center Number | Atomic Number | Atomic Type | Coordinates (Angstroms) |           |           |
|---------------|---------------|-------------|-------------------------|-----------|-----------|
|               |               |             | X                       | Y         | Z         |
| 1             | 6             | 0           | 0.198704                | 0.537330  | -0.023828 |
| 2             | 6             | 0           | 0.777831                | -0.786546 | 0.003853  |
| 3             | 6             | 0           | -1.292453               | -1.692385 | -0.001948 |
| 4             | 6             | 0           | -1.200505               | 0.602651  | -0.019546 |
| 5             | 6             | 0           | 1.306494                | 1.434933  | -0.021147 |
| 6             | 6             | 0           | 2.425512                | 0.593709  | 0.006514  |
| 7             | 1             | 0           | -1.936824               | -2.572945 | 0.001696  |
| 8             | 1             | 0           | 1.301898                | 2.519860  | -0.061263 |
| 9             | 1             | 0           | 3.466642                | 0.912062  | 0.011784  |
| 10            | 7             | 0           | -1.952908               | -0.505416 | -0.007163 |
| 11            | 7             | 0           | 0.013094                | -1.913708 | 0.009278  |
| 12            | 7             | 0           | -1.889920               | 1.830004  | -0.065656 |
| 13            | 1             | 0           | -2.843040               | 1.730091  | 0.270702  |
| 14            | 1             | 0           | -1.398009               | 2.584152  | 0.402466  |
| 15            | 7             | 0           | 2.131996                | -0.741076 | 0.022287  |

**C8-deprotonated N9H-amino Z (Z-12) B3LYP/6-31+G(d)**

SCF Done: E(RB3LYP) = -450.676087841

Zero-point correction= 0.110114  
(Hartree/Particle)

Thermal correction to Energy= 0.117285  
 Thermal correction to Enthalpy= 0.118230  
 Thermal correction to Gibbs Free Energy= 0.078533  
 Sum of electronic and zero-point Energies= -450.565974  
 Sum of electronic and thermal Energies= -450.558802  
 Sum of electronic and thermal Enthalpies= -450.557858  
 Sum of electronic and thermal Free Energies= -450.597555

|       | E (Thermal)<br>KCal/Mol | CV<br>Cal/Mol-Kelvin | S<br>Cal/Mol-Kelvin |
|-------|-------------------------|----------------------|---------------------|
| Total | 73.598                  | 28.960               | 83.548              |

| Center<br>Number | Atomic<br>Number | Atomic<br>Type | Coordinates (Angstroms) |           |           |
|------------------|------------------|----------------|-------------------------|-----------|-----------|
|                  |                  |                | X                       | Y         | Z         |
| 1                | 6                | 0              | -0.188929               | -0.569326 | -0.025349 |
| 2                | 6                | 0              | -0.768222               | 0.732476  | -0.002014 |
| 3                | 6                | 0              | 1.235275                | 1.732055  | 0.000596  |
| 4                | 6                | 0              | 1.214480                | -0.569223 | -0.019064 |
| 5                | 6                | 0              | -1.284973               | -1.497414 | -0.017162 |
| 6                | 6                | 0              | -2.518107               | -0.817414 | 0.009903  |
| 7                | 1                | 0              | 1.837478                | 2.640187  | 0.007338  |
| 8                | 1                | 0              | -1.194571               | -2.580155 | -0.048052 |
| 9                | 7                | 0              | 1.924320                | 0.573867  | -0.003660 |
| 10               | 7                | 0              | -0.090884               | 1.895093  | 0.005469  |
| 11               | 7                | 0              | 1.950448                | -1.762618 | -0.065567 |
| 12               | 1                | 0              | 2.893882                | -1.643905 | 0.288808  |
| 13               | 1                | 0              | 1.471309                | -2.551778 | 0.354693  |
| 14               | 7                | 0              | -2.122182               | 0.544532  | 0.018174  |
| 15               | 1                | 0              | -2.777158               | 1.312608  | 0.034853  |

### **C7-deprotonated N9H-amino Z (Z-13)**

SCF Done: E(RB3LYP) = -450.665067114

Zero-point correction= 0.109555  
 (Hartree/Particle)  
 Thermal correction to Energy= 0.116885  
 Thermal correction to Enthalpy= 0.117829  
 Thermal correction to Gibbs Free Energy= 0.077866  
 Sum of electronic and zero-point Energies= -450.555512  
 Sum of electronic and thermal Energies= -450.548182  
 Sum of electronic and thermal Enthalpies= -450.547238  
 Sum of electronic and thermal Free Energies= -450.587202

|       | E (Thermal)<br>KCal/Mol | CV<br>Cal/Mol-Kelvin | S<br>Cal/Mol-Kelvin |
|-------|-------------------------|----------------------|---------------------|
| Total | 73.346                  | 29.393               | 84.110              |

| Center<br>Number | Atomic<br>Number | Atomic<br>Type | Coordinates (Angstroms) |   |   |
|------------------|------------------|----------------|-------------------------|---|---|
|                  |                  |                | X                       | Y | Z |

|    |   |   |           |           |           |
|----|---|---|-----------|-----------|-----------|
| 1  | 6 | 0 | -0.188718 | -0.568973 | -0.019937 |
| 2  | 6 | 0 | -0.730148 | 0.745726  | -0.017768 |
| 3  | 6 | 0 | 1.288504  | 1.695848  | 0.015191  |
| 4  | 6 | 0 | 1.216833  | -0.603222 | -0.017916 |
| 5  | 6 | 0 | -1.218523 | -1.598415 | 0.010673  |
| 6  | 6 | 0 | -2.354660 | -0.812977 | 0.018684  |
| 7  | 7 | 0 | 1.957637  | 0.524970  | 0.012534  |
| 8  | 7 | 0 | -0.030349 | 1.902442  | -0.005765 |
| 9  | 7 | 0 | 1.880327  | -1.817629 | -0.078116 |
| 10 | 1 | 0 | 2.800591  | -1.824742 | 0.343652  |
| 11 | 1 | 0 | 1.275940  | -2.600290 | 0.158258  |
| 12 | 7 | 0 | -2.082150 | 0.593852  | -0.006015 |
| 13 | 1 | 0 | -2.742450 | 1.359017  | 0.025185  |
| 14 | 1 | 0 | -3.404849 | -1.097137 | 0.042784  |
| 15 | 1 | 0 | 1.912784  | 2.589783  | 0.038096  |

### C2-deprotonated N9H-amino Z (Z-14) B3LYP/6-31+G(d)

SCF Done: E(RB3LYP) = -450.636115223

Zero-point correction= 0.107756  
(Hartree/Particle)

Thermal correction to Energy= 0.115399

Thermal correction to Enthalpy= 0.116343

Thermal correction to Gibbs Free Energy= 0.075728

Sum of electronic and zero-point Energies= -450.528359

Sum of electronic and thermal Energies= -450.520716

Sum of electronic and thermal Enthalpies= -450.519772

Sum of electronic and thermal Free Energies= -450.560387

|       | E (Thermal) | CV             | S              |
|-------|-------------|----------------|----------------|
|       | KCal/Mol    | Cal/Mol-Kelvin | Cal/Mol-Kelvin |
| Total | 72.414      | 30.416         | 85.481         |

| Center Number | Atomic Number | Atomic Type | Coordinates (Angstroms) |           |           |
|---------------|---------------|-------------|-------------------------|-----------|-----------|
|               |               |             | X                       | Y         | Z         |
| 1             | 6             | 0           | -0.120849               | -0.535323 | -0.020679 |
| 2             | 6             | 0           | -0.691534               | 0.756977  | 0.009298  |
| 3             | 6             | 0           | 1.328630                | 1.907194  | -0.009346 |
| 4             | 6             | 0           | 1.290377                | -0.504993 | -0.018306 |
| 5             | 6             | 0           | -1.196279               | -1.494150 | -0.029719 |
| 6             | 6             | 0           | -2.369967               | -0.774091 | -0.002309 |
| 7             | 1             | 0           | -1.126458               | -2.575188 | -0.069801 |
| 8             | 7             | 0           | 1.957006                | 0.640405  | -0.013956 |
| 9             | 7             | 0           | -0.055627               | 1.928865  | 0.015567  |
| 10            | 7             | 0           | 2.043609                | -1.700439 | -0.060554 |
| 11            | 1             | 0           | 3.008359                | -1.497306 | 0.191067  |
| 12            | 1             | 0           | 1.658777                | -2.448027 | 0.510519  |
| 13            | 7             | 0           | -2.068263               | 0.581353  | 0.025696  |
| 14            | 1             | 0           | -2.722398               | 1.349965  | 0.032163  |
| 15            | 1             | 0           | -3.397612               | -1.114423 | -0.004844 |



-----  
**N1-protonated N9H-amino Z (Z-15) B3LYP/6-31+G(d)**

SCF Done: E(RB+HF-LYP) = -451.665297307 A.U.

Zero-point correction= 0.137046  
(Hartree/Particle)  
Thermal correction to Energy= 0.144645  
Thermal correction to Enthalpy= 0.145589  
Thermal correction to Gibbs Free Energy= 0.105170  
Sum of electronic and zero-point Energies= -451.528252  
Sum of electronic and thermal Energies= -451.520653  
Sum of electronic and thermal Enthalpies= -451.519708  
Sum of electronic and thermal Free Energies= -451.560127

|       | E (Thermal)<br>KCal/Mol | CV<br>Cal/Mol-Kelvin | S<br>Cal/Mol-Kelvin |
|-------|-------------------------|----------------------|---------------------|
| Total | 90.766                  | 31.085               | 85.068              |

-----

| Center<br>Number | Atomic<br>Number | Atomic<br>Type | Coordinates (Angstroms) |           |           |
|------------------|------------------|----------------|-------------------------|-----------|-----------|
|                  |                  |                | X                       | Y         | Z         |
| 1                | 6                | 0              | -0.203543               | 0.561704  | -0.000282 |
| 2                | 6                | 0              | -0.723140               | -0.759554 | -0.000050 |
| 3                | 6                | 0              | 1.271299                | -1.747034 | -0.000078 |
| 4                | 6                | 0              | 1.197208                | 0.678150  | -0.000682 |
| 5                | 6                | 0              | -1.317826               | 1.459615  | -0.000300 |
| 6                | 6                | 0              | -2.442495               | 0.671323  | 0.000180  |
| 7                | 1                | 0              | 1.941750                | -2.600010 | 0.000656  |
| 8                | 1                | 0              | -1.311225               | 2.540683  | -0.000709 |
| 9                | 1                | 0              | -3.485860               | 0.953098  | -0.000083 |
| 10               | 7                | 0              | 1.885449                | -0.507205 | -0.000191 |
| 11               | 7                | 0              | -0.015053               | -1.910580 | 0.000036  |
| 12               | 7                | 0              | 1.875590                | 1.834615  | 0.000637  |
| 13               | 1                | 0              | 2.886216                | 1.884506  | 0.000554  |
| 14               | 7                | 0              | -2.073956               | -0.663782 | 0.000334  |
| 15               | 1                | 0              | -2.704376               | -1.457621 | 0.000455  |
| 16               | 1                | 0              | 1.378977                | 2.715504  | 0.000404  |
| 17               | 1                | 0              | 2.901290                | -0.492722 | 0.000278  |

-----

**N1-protonated N9H-amino Z (Z-15) B3LYP/6-31+G(d) cpcm, water, RADII=UAKS**

Total free energy in solution:  
with all non electrostatic terms (a.u.) = -451.770294

-----

|                            |              |        |
|----------------------------|--------------|--------|
| (Polarized solute)-Solvent | (kcal/mol) = | -70.49 |
| Cavitation energy          | (kcal/mol) = | 16.98  |
| Dispersion energy          | (kcal/mol) = | -21.38 |
| Repulsion energy           | (kcal/mol) = | 5.16   |
| Total non electrostatic    | (kcal/mol) = | 0.76   |

### ***N3-protonated N9H-amino Z (Z-16) B3LYP/6-31+G(d)***

SCF Done: E(RB+HF-LYP) = -451.663618885 A.U.

Zero-point correction= 0.137233  
(Hartree/Particle)  
Thermal correction to Energy= 0.144725  
Thermal correction to Enthalpy= 0.145670  
Thermal correction to Gibbs Free Energy= 0.105396  
Sum of electronic and zero-point Energies= -451.526386  
Sum of electronic and thermal Energies= -451.518893  
Sum of electronic and thermal Enthalpies= -451.517949  
Sum of electronic and thermal Free Energies= -451.558223

|       | E (Thermal)<br>KCal/Mol | CV<br>Cal/Mol-Kelvin | S<br>Cal/Mol-Kelvin |
|-------|-------------------------|----------------------|---------------------|
| Total | 90.817                  | 30.883               | 84.762              |

| Center<br>Number | Atomic<br>Number | Atomic<br>Type | Coordinates (Angstroms) |           |           |
|------------------|------------------|----------------|-------------------------|-----------|-----------|
|                  |                  |                | X                       | Y         | Z         |
| 1                | 6                | 0              | 0.188044                | -0.571328 | 0.000035  |
| 2                | 6                | 0              | 0.720642                | 0.727831  | -0.000112 |
| 3                | 6                | 0              | -1.435265               | 1.626790  | 0.000162  |
| 4                | 6                | 0              | -1.229233               | -0.675437 | -0.000035 |
| 5                | 6                | 0              | 1.307521                | -1.470036 | 0.000135  |
| 6                | 6                | 0              | 2.435467                | -0.695540 | 0.000076  |
| 7                | 1                | 0              | -2.054116               | 2.518961  | 0.000243  |
| 8                | 1                | 0              | 1.289718                | -2.550730 | 0.000287  |
| 9                | 1                | 0              | 3.479603                | -0.973047 | 0.000130  |
| 10               | 7                | 0              | -2.000368               | 0.452769  | 0.000066  |
| 11               | 7                | 0              | -0.087104               | 1.830723  | 0.000094  |
| 12               | 7                | 0              | -1.887612               | -1.835100 | -0.000358 |
| 13               | 1                | 0              | -2.901355               | -1.826347 | 0.000597  |
| 14               | 1                | 0              | -1.414761               | -2.728539 | 0.000495  |
| 15               | 7                | 0              | 2.071081                | 0.652088  | -0.000190 |
| 16               | 1                | 0              | 2.723806                | 1.425880  | 0.000286  |
| 17               | 1                | 0              | 0.282077                | 2.776766  | -0.000893 |

### ***N9-protonated N9H-amino Z (Z-17) B3LYP/6-31+G(d)***

SCF Done: E(RB+HF-LYP) = -451.605986624 A.U.

Zero-point correction= 0.136660  
(Hartree/Particle)  
Thermal correction to Energy= 0.144261  
Thermal correction to Enthalpy= 0.145205  
Thermal correction to Gibbs Free Energy= 0.104625  
Sum of electronic and zero-point Energies= -451.469326  
Sum of electronic and thermal Energies= -451.461726  
Sum of electronic and thermal Enthalpies= -451.460782  
Sum of electronic and thermal Free Energies= -451.501362

|  | E (Thermal)<br>KCal/Mol | CV<br>Cal/Mol-Kelvin | S<br>Cal/Mol-Kelvin |
|--|-------------------------|----------------------|---------------------|
|--|-------------------------|----------------------|---------------------|

Total 90.525 30.639 85.409

| Center Number | Atomic Number | Atomic Type | Coordinates (Angstroms) |           |           |
|---------------|---------------|-------------|-------------------------|-----------|-----------|
|               |               |             | X                       | Y         | Z         |
| 1             | 6             | 0           | 0.118124                | 0.553511  | -0.000003 |
| 2             | 6             | 0           | 0.617671                | -0.737477 | -0.000048 |
| 3             | 6             | 0           | -1.352141               | -1.706413 | 0.000024  |
| 4             | 6             | 0           | -1.304423               | 0.612641  | -0.000047 |
| 5             | 6             | 0           | 1.238698                | 1.489421  | -0.000114 |
| 6             | 6             | 0           | 2.401092                | 0.816156  | -0.000062 |
| 7             | 1             | 0           | -1.954540               | -2.609602 | 0.000013  |
| 8             | 1             | 0           | 1.175387                | 2.571168  | -0.000102 |
| 9             | 1             | 0           | 3.433404                | 1.134524  | -0.000233 |
| 10            | 7             | 0           | -1.998497               | -0.551959 | 0.000006  |
| 11            | 7             | 0           | -0.003289               | -1.883790 | -0.000133 |
| 12            | 7             | 0           | -2.018183               | 1.748508  | 0.000090  |
| 13            | 1             | 0           | -3.029435               | 1.683147  | -0.000120 |
| 14            | 1             | 0           | -1.598583               | 2.666856  | 0.000251  |
| 15            | 7             | 0           | 2.113869                | -0.648834 | 0.000156  |
| 16            | 1             | 0           | 2.501391                | -1.130591 | -0.824816 |
| 17            | 1             | 0           | 2.500941                | -1.130003 | 0.825677  |

**C7-protonated N9H-amino Z (Z-18) B3LYP/6-31+G(d)**

SCF Done: E(RB3LYP) = -451.626685996 A.U. after  
 Zero-point correction= 0.135424  
 (Hartree/Particle)  
 Thermal correction to Energy= 0.143056  
 Thermal correction to Enthalpy= 0.144000  
 Thermal correction to Gibbs Free Energy= 0.103352  
 Sum of electronic and zero-point Energies= -451.491262  
 Sum of electronic and thermal Energies= -451.483630  
 Sum of electronic and thermal Enthalpies= -451.482686  
 Sum of electronic and thermal Free Energies= -451.523334

|       | E (Thermal)<br>KCal/Mol | CV<br>Cal/Mol-Kelvin | S<br>Cal/Mol-Kelvin |
|-------|-------------------------|----------------------|---------------------|
| Total | 89.769                  | 30.535               | 85.550              |

| Center Number | Atomic Number | Atomic Type | Coordinates (Angstroms) |           |           |
|---------------|---------------|-------------|-------------------------|-----------|-----------|
|               |               |             | X                       | Y         | Z         |
| 1             | 6             | 0           | -0.137519               | 0.526202  | 0.000464  |
| 2             | 6             | 0           | -0.616116               | -0.773738 | 0.000258  |
| 3             | 6             | 0           | 1.377964                | -1.694962 | -0.000082 |
| 4             | 6             | 0           | 1.276233                | 0.623890  | 0.000056  |
| 5             | 6             | 0           | -1.307226               | 1.470719  | 0.000119  |
| 6             | 6             | 0           | -2.468830               | 0.528701  | -0.000312 |
| 7             | 1             | 0           | 2.008739                | -2.578812 | -0.000270 |
| 8             | 1             | 0           | -1.372633               | 2.133258  | 0.879145  |
| 9             | 1             | 0           | -3.524439               | 0.780703  | -0.000521 |
| 10            | 7             | 0           | 1.999055                | -0.520790 | -0.000284 |

|    |   |   |           |           |           |
|----|---|---|-----------|-----------|-----------|
| 11 | 7 | 0 | 0.043406  | -1.910587 | 0.000257  |
| 12 | 7 | 0 | 1.961121  | 1.781659  | -0.000030 |
| 13 | 1 | 0 | 2.973474  | 1.742470  | -0.000674 |
| 14 | 1 | 0 | 1.518337  | 2.688631  | 0.000172  |
| 15 | 7 | 0 | -2.051770 | -0.700237 | -0.000125 |
| 16 | 1 | 0 | -2.641123 | -1.534630 | -0.000579 |
| 17 | 1 | 0 | -1.372067 | 2.133192  | -0.879018 |

**N10-protonated N9H-amino Z (Z-19) B3LYP/6-31+G(d)**

SCF Done: E(RB+HF-LYP) = -451.628824677 A.U.

Zero-point correction= 0.137918  
(Hartree/Particle)  
Thermal correction to Energy= 0.145482  
Thermal correction to Enthalpy= 0.146426  
Thermal correction to Gibbs Free Energy= 0.105672  
Sum of electronic and zero-point Energies= -451.490906  
Sum of electronic and thermal Energies= -451.483343  
Sum of electronic and thermal Enthalpies= -451.482398  
Sum of electronic and thermal Free Energies= -451.523152

|       | E (Thermal)<br>KCal/Mol | CV<br>Cal/Mol-Kelvin | S<br>Cal/Mol-Kelvin |
|-------|-------------------------|----------------------|---------------------|
| Total | 91.291                  | 29.780               | 85.774              |

| Center<br>Number | Atomic<br>Number | Atomic<br>Type | Coordinates (Angstroms) |           |           |
|------------------|------------------|----------------|-------------------------|-----------|-----------|
|                  |                  |                | X                       | Y         | Z         |
| 1                | 6                | 0              | -0.166901               | -0.560248 | -0.000221 |
| 2                | 6                | 0              | -0.797393               | 0.733207  | -0.000119 |
| 3                | 6                | 0              | 1.153424                | 1.835831  | 0.000051  |
| 4                | 6                | 0              | 1.214807                | -0.437231 | -0.000441 |
| 5                | 6                | 0              | -1.208275               | -1.542161 | -0.000229 |
| 6                | 6                | 0              | -2.390665               | -0.839247 | 0.000175  |
| 7                | 1                | 0              | 1.710488                | 2.766201  | 0.000417  |
| 8                | 1                | 0              | -1.123335               | -2.620177 | -0.000394 |
| 9                | 1                | 0              | -3.406203               | -1.210721 | 0.000229  |
| 10               | 7                | 0              | 1.881287                | 0.695141  | -0.000046 |
| 11               | 7                | 0              | -0.175787               | 1.906313  | -0.000050 |
| 12               | 7                | 0              | 2.118656                | -1.635122 | 0.000292  |
| 13               | 1                | 0              | 3.085513                | -1.274884 | -0.000715 |
| 14               | 1                | 0              | 1.990882                | -2.225510 | 0.833352  |
| 15               | 7                | 0              | -2.143671               | 0.518937  | 0.000173  |
| 16               | 1                | 0              | -2.840453               | 1.254654  | 0.000527  |
| 17               | 1                | 0              | 1.989735                | -2.227353 | -0.831287 |

**Z3 (3-deazaadenine): neutral, protonated and deprotonated species**

**Amino N9H Z3 (Z3-1) B3LYP/6-31+G(d)**

SCF Done: E(RB+HF-LYP) = -451.289796555 A.U.

Zero-point correction= 0.123581  
(Hartree/Particle)  
Thermal correction to Energy= 0.130930  
Thermal correction to Enthalpy= 0.131874  
Thermal correction to Gibbs Free Energy= 0.091929  
Sum of electronic and zero-point Energies= -451.166215  
Sum of electronic and thermal Energies= -451.158866  
Sum of electronic and thermal Enthalpies= -451.157922  
Sum of electronic and thermal Free Energies= -451.197868

|       | E (Thermal) | CV             | S              |
|-------|-------------|----------------|----------------|
|       | KCal/Mol    | Cal/Mol-Kelvin | Cal/Mol-Kelvin |
| Total | 82.160      | 29.932         | 84.073         |

| Center Number | Atomic Number | Atomic Type | Coordinates (Angstroms) |           |           |
|---------------|---------------|-------------|-------------------------|-----------|-----------|
|               |               |             | X                       | Y         | Z         |
| 1             | 6             | 0           | -0.203219               | -0.488326 | -0.006298 |
| 2             | 6             | 0           | -0.732119               | 0.811630  | -0.005261 |
| 3             | 6             | 0           | 1.460988                | 1.654532  | 0.007115  |
| 4             | 6             | 0           | 1.202881                | -0.649684 | -0.006143 |
| 5             | 6             | 0           | -2.319963               | -0.744834 | 0.006128  |
| 6             | 1             | 0           | 2.180091                | 2.471110  | 0.015376  |
| 7             | 7             | 0           | 1.767717                | -1.898592 | -0.061705 |
| 8             | 1             | 0           | 2.747068                | -1.958219 | 0.183693  |
| 9             | 1             | 0           | 1.185229                | -2.687752 | 0.184048  |
| 10            | 7             | 0           | 2.006894                | 0.417842  | 0.008404  |
| 11            | 7             | 0           | -1.212273               | -1.441761 | 0.003241  |
| 12            | 7             | 0           | -2.100603               | 0.619508  | -0.000189 |
| 13            | 6             | 0           | 0.100599                | 1.942066  | -0.002692 |
| 14            | 1             | 0           | -2.811611               | 1.337168  | 0.001628  |
| 15            | 1             | 0           | -3.321070               | -1.156596 | 0.013341  |
| 16            | 1             | 0           | -0.266859               | 2.963014  | -0.003421 |

**Amino N7H Z3 (Z3-2) B3LYP/6-31+G(d)**

SCF Done: E(RB+HF-LYP) = -451.283481399 A.U.

Zero-point correction= 0.123643  
(Hartree/Particle)  
Thermal correction to Energy= 0.130995  
Thermal correction to Enthalpy= 0.131939  
Thermal correction to Gibbs Free Energy= 0.091921  
Sum of electronic and zero-point Energies= -451.159839  
Sum of electronic and thermal Energies= -451.152487  
Sum of electronic and thermal Enthalpies= -451.151542  
Sum of electronic and thermal Free Energies= -451.191561

|       | E (Thermal) | CV             | S              |
|-------|-------------|----------------|----------------|
|       | KCal/Mol    | Cal/Mol-Kelvin | Cal/Mol-Kelvin |
| Total | 82.201      | 29.658         | 84.226         |

| Center | Atomic | Atomic | Coordinates (Angstroms) |  |  |
|--------|--------|--------|-------------------------|--|--|
|--------|--------|--------|-------------------------|--|--|

| Number | Number | Type | X         | Y         | Z         |
|--------|--------|------|-----------|-----------|-----------|
| 1      | 6      | 0    | -0.202522 | -0.459476 | -0.000304 |
| 2      | 6      | 0    | -0.756897 | 0.833905  | 0.025304  |
| 3      | 6      | 0    | 1.463869  | 1.656458  | -0.017563 |
| 4      | 6      | 0    | 1.190788  | -0.648863 | -0.001436 |
| 5      | 6      | 0    | -2.411888 | -0.521179 | -0.015209 |
| 6      | 1      | 0    | 2.192580  | 2.463303  | -0.037453 |
| 7      | 7      | 0    | 1.766102  | -1.922663 | -0.056489 |
| 8      | 1      | 0    | 2.774695  | -1.875061 | 0.055316  |
| 9      | 1      | 0    | 1.359657  | -2.609992 | 0.570214  |
| 10     | 7      | 0    | 1.996431  | 0.409593  | -0.017591 |
| 11     | 7      | 0    | -1.293107 | -1.319314 | -0.017530 |
| 12     | 7      | 0    | -2.143126 | 0.761732  | 0.021517  |
| 13     | 6      | 0    | 0.107009  | 1.942921  | 0.018685  |
| 14     | 1      | 0    | -3.407519 | -0.946724 | -0.037215 |
| 15     | 1      | 0    | -0.266198 | 2.961210  | 0.031615  |
| 16     | 1      | 0    | -1.279471 | -2.320769 | -0.148687 |

**Amino N1H Z3 (Z3-3) B3LYP/6-31+G(d)**

SCF Done: E(RB+HF-LYP) = -451.271638149 A.U.

Zero-point correction= 0.123841  
(Hartree/Particle)  
Thermal correction to Energy= 0.131203  
Thermal correction to Enthalpy= 0.132147  
Thermal correction to Gibbs Free Energy= 0.092109  
Sum of electronic and zero-point Energies= -451.147797  
Sum of electronic and thermal Energies= -451.140435  
Sum of electronic and thermal Enthalpies= -451.139491  
Sum of electronic and thermal Free Energies= -451.179529

|       |   | E (Thermal) | CV             | S              |           |
|-------|---|-------------|----------------|----------------|-----------|
|       |   | KCal/Mol    | Cal/Mol-Kelvin | Cal/Mol-Kelvin |           |
| Total |   | 82.331      | 29.683         | 84.268         |           |
| 1     | 6 | 0           | -0.278751      | -0.500829      | -0.011945 |
| 2     | 6 | 0           | -0.819817      | 0.829014       | -0.009452 |
| 3     | 6 | 0           | 1.401578       | 1.692405       | 0.006788  |
| 4     | 6 | 0           | 1.090598       | -0.716917      | -0.005059 |
| 5     | 6 | 0           | -2.374110      | -0.607273      | 0.008794  |
| 6     | 1 | 0           | 2.162399       | 2.462833       | 0.016584  |
| 7     | 7 | 0           | 1.672909       | -1.964554      | -0.070381 |
| 8     | 1 | 0           | 2.501896       | -2.123810      | 0.491893  |
| 9     | 1 | 0           | 0.988278       | -2.709354      | 0.022938  |
| 10    | 7 | 0           | 1.887724       | 0.392169       | -0.002648 |
| 11    | 7 | 0           | -1.299420      | -1.410516      | 0.003246  |
| 12    | 7 | 0           | -2.163121      | 0.740902       | 0.005491  |
| 13    | 6 | 0           | 0.057568       | 1.945198       | 0.004171  |
| 14    | 1 | 0           | -3.380534      | -1.011765      | 0.017657  |
| 15    | 1 | 0           | -0.309938      | 2.965697       | 0.016990  |
| 16    | 1 | 0           | 2.888856       | 0.260807       | -0.075814 |

### Amino N1H Z3 (Z3-3) B3LYP/6-31+G(d) cpcm, water, RADII=UAKS

Total free energy in solution:  
with all non electrostatic terms (a.u.) = -451.309521

---

(Polarized solute)-Solvent (kcal/mol) = -31.98

---

Cavitation energy (kcal/mol) = 16.89  
Dispersion energy (kcal/mol) = -20.65  
Repulsion energy (kcal/mol) = 4.66  
Total non electrostatic (kcal/mol) = 0.91

### Imino (H taward N7) N1H N9H Z3 (Z3-4) B3LYP/6-31+G(d)

SCF Done: E(RB+HF-LYP) = -451.270111768 A.U.

Zero-point correction= 0.123866  
(Hartree/Particle)  
Thermal correction to Energy= 0.131059  
Thermal correction to Enthalpy= 0.132003  
Thermal correction to Gibbs Free Energy= 0.092164  
Sum of electronic and zero-point Energies= -451.146246  
Sum of electronic and thermal Energies= -451.139053  
Sum of electronic and thermal Enthalpies= -451.138108  
Sum of electronic and thermal Free Energies= -451.177948

|       | E (Thermal)<br>KCal/Mol | CV<br>Cal/Mol-Kelvin | S<br>Cal/Mol-Kelvin |
|-------|-------------------------|----------------------|---------------------|
| Total | 82.241                  | 29.240               | 83.850              |

| Center<br>Number | Atomic<br>Number | Atomic<br>Type | Coordinates (Angstroms) |           |           |
|------------------|------------------|----------------|-------------------------|-----------|-----------|
|                  |                  |                | X                       | Y         | Z         |
| 1                | 6                | 0              | -0.260721               | -0.520491 | -0.000092 |
| 2                | 6                | 0              | -0.667512               | 0.811241  | 0.000156  |
| 3                | 6                | 0              | 1.563291                | 1.560987  | -0.000208 |
| 4                | 6                | 0              | 1.144578                | -0.888625 | -0.000030 |
| 5                | 6                | 0              | -2.392640               | -0.583280 | -0.000165 |
| 6                | 1                | 0              | 2.360203                | 2.296350  | -0.000141 |
| 7                | 7                | 0              | 1.709464                | -2.045261 | 0.000321  |
| 8                | 7                | 0              | 1.973672                | 0.253117  | -0.000357 |
| 9                | 7                | 0              | -1.344136               | -1.372065 | -0.000068 |
| 10               | 7                | 0              | -2.043708               | 0.751903  | -0.000049 |
| 11               | 6                | 0              | 0.243578                | 1.911305  | 0.000428  |
| 12               | 1                | 0              | -3.425713               | -0.904301 | -0.000096 |
| 13               | 1                | 0              | -0.064701               | 2.949633  | 0.000775  |
| 14               | 1                | 0              | 2.964153                | 0.038530  | -0.000507 |
| 15               | 1                | 0              | -2.681733               | 1.535842  | -0.000126 |
| 16               | 1                | 0              | 0.997309                | -2.776730 | 0.000628  |

### Imino (H taward N1) N1H N7H Z3 (Z3-5) B3LYP/6-31+G(d)

SCF Done: E(RB+HF-LYP) = -451.269314720 A.U.

Zero-point correction= 0.123714  
(Hartree/Particle)  
Thermal correction to Energy= 0.130901  
Thermal correction to Enthalpy= 0.131845  
Thermal correction to Gibbs Free Energy= 0.092060  
Sum of electronic and zero-point Energies= -451.145601  
Sum of electronic and thermal Energies= -451.138414  
Sum of electronic and thermal Enthalpies= -451.137470  
Sum of electronic and thermal Free Energies= -451.177254

|       | E (Thermal)<br>KCal/Mol | CV<br>Cal/Mol-Kelvin | S<br>Cal/Mol-Kelvin |
|-------|-------------------------|----------------------|---------------------|
| Total | 82.141                  | 29.295               | 83.734              |

| Center<br>Number | Atomic<br>Number | Atomic<br>Type | Coordinates (Angstroms) |           |           |
|------------------|------------------|----------------|-------------------------|-----------|-----------|
|                  |                  |                | X                       | Y         | Z         |
| 1                | 6                | 0              | 0.255658                | -0.464352 | 0.000001  |
| 2                | 6                | 0              | 0.692913                | 0.855435  | -0.000171 |
| 3                | 6                | 0              | -1.574117               | 1.557638  | 0.000059  |
| 4                | 6                | 0              | -1.116637               | -0.890654 | -0.000083 |
| 5                | 6                | 0              | 2.449088                | -0.364977 | 0.000034  |
| 6                | 1                | 0              | -2.388356               | 2.273418  | 0.000178  |
| 7                | 7                | 0              | -1.456907               | -2.140400 | -0.000013 |
| 8                | 7                | 0              | -1.971619               | 0.226006  | 0.000155  |
| 9                | 7                | 0              | 1.392509                | -1.233652 | -0.000105 |
| 10               | 7                | 0              | 2.071845                | 0.900317  | 0.000252  |
| 11               | 6                | 0              | -0.264402               | 1.922631  | -0.000223 |
| 12               | 1                | 0              | 3.474959                | -0.708917 | 0.000297  |
| 13               | 1                | 0              | 0.034287                | 2.963702  | -0.000328 |
| 14               | 1                | 0              | -2.964700               | 0.031499  | 0.000299  |
| 15               | 1                | 0              | 1.408416                | -2.245366 | -0.000228 |
| 16               | 1                | 0              | -2.470429               | -2.274574 | 0.000059  |

***Imino (H toward N7) N1H N7H Z3 (Z3-6) B3LYP/6-31+G(d)***

SCF Done: E(RB+HF-LYP) = -451.267897381 A.U.

Zero-point correction= 0.123597  
(Hartree/Particle)  
Thermal correction to Energy= 0.130839  
Thermal correction to Enthalpy= 0.131784  
Thermal correction to Gibbs Free Energy= 0.091851  
Sum of electronic and zero-point Energies= -451.144301  
Sum of electronic and thermal Energies= -451.137058  
Sum of electronic and thermal Enthalpies= -451.136114  
Sum of electronic and thermal Free Energies= -451.176047

|       | E (Thermal)<br>KCal/Mol | CV<br>Cal/Mol-Kelvin | S<br>Cal/Mol-Kelvin |
|-------|-------------------------|----------------------|---------------------|
| Total | 82.103                  | 29.414               | 84.046              |

| Center<br>Number | Atomic<br>Number | Atomic<br>Type | Coordinates (Angstroms) |   |   |
|------------------|------------------|----------------|-------------------------|---|---|
|                  |                  |                | X                       | Y | Z |



|    |   |   |           |           |           |
|----|---|---|-----------|-----------|-----------|
| 1  | 6 | 0 | 0.256933  | 0.476083  | 0.000131  |
| 2  | 6 | 0 | 0.680847  | -0.852232 | 0.000008  |
| 3  | 6 | 0 | -1.585397 | -1.544128 | -0.000058 |
| 4  | 6 | 0 | -1.123295 | 0.895967  | 0.000003  |
| 5  | 6 | 0 | 2.458389  | 0.336705  | -0.000037 |
| 6  | 1 | 0 | -2.402915 | -2.256154 | 0.000302  |
| 7  | 7 | 0 | -1.670706 | 2.071487  | -0.000043 |
| 8  | 7 | 0 | -1.969469 | -0.220138 | -0.000027 |
| 9  | 7 | 0 | 1.417052  | 1.225801  | -0.000052 |
| 10 | 7 | 0 | 2.059431  | -0.918308 | 0.000022  |
| 11 | 6 | 0 | -0.275795 | -1.916784 | -0.000019 |
| 12 | 1 | 0 | 3.489425  | 0.665542  | 0.000030  |
| 13 | 1 | 0 | 0.023591  | -2.957243 | -0.000087 |
| 14 | 1 | 0 | -2.955195 | 0.015082  | 0.000089  |
| 15 | 1 | 0 | -0.971151 | 2.813538  | 0.000141  |
| 16 | 1 | 0 | 1.491995  | 2.233683  | 0.000061  |

***Imino (H toward N1) N1H N9H Z3 (Z3-7) B3LYP/6-31+G(d)***

SCF Done: E(RB+HF-LYP) = -451.258846801 A.U.

Zero-point correction= 0.123177  
(Hartree/Particle)  
Thermal correction to Energy= 0.130466  
Thermal correction to Enthalpy= 0.131410  
Thermal correction to Gibbs Free Energy= 0.091388  
Sum of electronic and zero-point Energies= -451.135670  
Sum of electronic and thermal Energies= -451.128381  
Sum of electronic and thermal Enthalpies= -451.127437  
Sum of electronic and thermal Free Energies= -451.167459

|       | E (Thermal) | CV             | S              |
|-------|-------------|----------------|----------------|
|       | KCal/Mol    | Cal/Mol-Kelvin | Cal/Mol-Kelvin |
| Total | 81.868      | 29.615         | 84.234         |

| Center Number | Atomic Number | Atomic Type | Coordinates (Angstroms) |           |           |
|---------------|---------------|-------------|-------------------------|-----------|-----------|
|               |               |             | X                       | Y         | Z         |
| 1             | 6             | 0           | -0.257852               | -0.540614 | -0.000014 |
| 2             | 6             | 0           | -0.692005               | 0.784417  | 0.000011  |
| 3             | 6             | 0           | 1.511453                | 1.605494  | 0.000004  |
| 4             | 6             | 0           | 1.158112                | -0.875139 | -0.000022 |
| 5             | 6             | 0           | -2.388604               | -0.638067 | 0.000022  |
| 6             | 1             | 0           | 2.288950                | 2.361526  | -0.000010 |
| 7             | 7             | 0           | 1.621801                | -2.075433 | 0.000029  |
| 8             | 1             | 0           | 2.645701                | -2.091210 | 0.000053  |
| 9             | 7             | 0           | 1.957740                | 0.301716  | 0.000001  |
| 10            | 7             | 0           | -1.328252               | -1.408222 | -0.000018 |
| 11            | 7             | 0           | -2.065971               | 0.703711  | -0.000109 |
| 12            | 6             | 0           | 0.185204                | 1.911927  | -0.000010 |
| 13            | 1             | 0           | -3.415768               | -0.978169 | 0.000048  |
| 14            | 1             | 0           | -0.156567               | 2.939995  | 0.000006  |
| 15            | 1             | 0           | 2.958353                | 0.149625  | 0.000020  |
| 16            | 1             | 0           | -2.715742               | 1.477725  | 0.000603  |

**N10-deprotonated N9H-amino (N10H\_N1side) Z3 (Z3-8) B3LYP/6-31+G(d)**

SCF Done: E(RB+HF-LYP) = -450.698872237 A.U.

Zero-point correction= 0.108641  
(Hartree/Particle)  
Thermal correction to Energy= 0.115905  
Thermal correction to Enthalpy= 0.116849  
Thermal correction to Gibbs Free Energy= 0.076814  
Sum of electronic and zero-point Energies= -450.590231  
Sum of electronic and thermal Energies= -450.582968  
Sum of electronic and thermal Enthalpies= -450.582023  
Sum of electronic and thermal Free Energies= -450.622058

|       | E (Thermal)<br>KCal/Mol | CV<br>Cal/Mol-Kelvin | S<br>Cal/Mol-Kelvin |
|-------|-------------------------|----------------------|---------------------|
| Total | 72.731                  | 28.929               | 84.261              |

| Center<br>Number | Atomic<br>Number | Atomic<br>Type | Coordinates (Angstroms) |           |           |
|------------------|------------------|----------------|-------------------------|-----------|-----------|
|                  |                  |                | X                       | Y         | Z         |
| 1                | 6                | 0              | -0.212522               | -0.533803 | -0.000144 |
| 2                | 6                | 0              | -0.672534               | 0.790202  | -0.000212 |
| 3                | 6                | 0              | 1.549030                | 1.545693  | 0.000181  |
| 4                | 6                | 0              | 1.222418                | -0.811713 | 0.000086  |
| 5                | 6                | 0              | -2.359395               | -0.665926 | 0.000245  |
| 6                | 7                | 0              | 1.694792                | -2.035149 | -0.000125 |
| 7                | 7                | 0              | 2.058437                | 0.312640  | 0.000178  |
| 8                | 7                | 0              | -1.286716               | -1.416988 | -0.000044 |
| 9                | 7                | 0              | -2.053889               | 0.687688  | -0.000134 |
| 10               | 6                | 0              | 0.194755                | 1.905886  | -0.000182 |
| 11               | 1                | 0              | -2.709500               | 1.454739  | 0.000923  |
| 12               | 1                | 0              | -3.384130               | -1.018388 | 0.000167  |
| 13               | 1                | 0              | -0.136199               | 2.941087  | -0.000031 |
| 14               | 1                | 0              | 2.293708                | 2.349166  | -0.000181 |
| 15               | 1                | 0              | 2.717236                | -1.945974 | 0.000147  |

**N10-deprotonated N9H-amino (N10H\_N7side) Z3 (Z3-9) B3LYP/6-31+G(d)**

SCF Done: E(RB+HF-LYP) = -450.698027344 A.U.

Zero-point correction= 0.108634  
(Hartree/Particle)  
Thermal correction to Energy= 0.115899  
Thermal correction to Enthalpy= 0.116843  
Thermal correction to Gibbs Free Energy= 0.076828  
Sum of electronic and zero-point Energies= -450.589393  
Sum of electronic and thermal Energies= -450.582128  
Sum of electronic and thermal Enthalpies= -450.581184  
Sum of electronic and thermal Free Energies= -450.621200

|       | E (Thermal)<br>KCal/Mol | CV<br>Cal/Mol-Kelvin | S<br>Cal/Mol-Kelvin |
|-------|-------------------------|----------------------|---------------------|
| Total | 72.728                  | 28.980               | 84.220              |

| Center<br>Number | Atomic<br>Number | Atomic<br>Type | Coordinates (Angstroms) |           |           |
|------------------|------------------|----------------|-------------------------|-----------|-----------|
|                  |                  |                | X                       | Y         | Z         |
| 1                | 6                | 0              | 0.207444                | -0.503375 | -0.000360 |
| 2                | 6                | 0              | 0.632422                | 0.830193  | 0.000156  |
| 3                | 6                | 0              | -1.618854               | 1.491367  | -0.000174 |
| 4                | 6                | 0              | -1.217209               | -0.841256 | -0.000007 |
| 5                | 6                | 0              | 2.357910                | -0.585981 | -0.000091 |
| 6                | 7                | 0              | -1.697512               | -2.063922 | 0.000585  |
| 7                | 1                | 0              | -0.899664               | -2.706911 | 0.000858  |
| 8                | 7                | 0              | -2.090071               | 0.246142  | -0.000411 |
| 9                | 7                | 0              | 1.300950                | -1.362106 | -0.000449 |
| 10               | 7                | 0              | 2.017655                | 0.758764  | 0.000292  |
| 11               | 6                | 0              | -0.276081               | 1.909221  | 0.000175  |
| 12               | 1                | 0              | 2.657030                | 1.539654  | 0.000440  |
| 13               | 1                | 0              | 3.390590                | -0.913587 | -0.000224 |
| 14               | 1                | 0              | 0.010689                | 2.957420  | 0.001017  |
| 15               | 1                | 0              | -2.389599               | 2.270266  | -0.000396 |

**N9-deprotonated N9H-amino Z3 (Z3-10) B3LYP/6-31+G(d)**

SCF Done: E(RB+HF-LYP) = -450.744457816 A.U.

Zero-point correction= 0.110612  
(Hartree/Particle)  
Thermal correction to Energy= 0.117550  
Thermal correction to Enthalpy= 0.118494  
Thermal correction to Gibbs Free Energy= 0.079191  
Sum of electronic and zero-point Energies= -450.633846  
Sum of electronic and thermal Energies= -450.626908  
Sum of electronic and thermal Enthalpies= -450.625964  
Sum of electronic and thermal Free Energies= -450.665267

|       | E (Thermal) | CV             | S              |
|-------|-------------|----------------|----------------|
|       | KCal/Mol    | Cal/Mol-Kelvin | Cal/Mol-Kelvin |
| Total | 73.764      | 27.930         | 82.721         |

| Center<br>Number | Atomic<br>Number | Atomic<br>Type | Coordinates (Angstroms) |           |           |
|------------------|------------------|----------------|-------------------------|-----------|-----------|
|                  |                  |                | X                       | Y         | Z         |
| 1                | 6                | 0              | -0.242461               | -0.486750 | -0.021211 |
| 2                | 6                | 0              | -0.797609               | 0.823668  | -0.009386 |
| 3                | 6                | 0              | 1.440585                | 1.647739  | 0.009640  |
| 4                | 6                | 0              | 1.156093                | -0.647674 | -0.020112 |
| 5                | 6                | 0              | -2.347682               | -0.623182 | 0.012418  |
| 6                | 1                | 0              | 2.166947                | 2.461337  | 0.027092  |
| 7                | 7                | 0              | 1.721171                | -1.933274 | -0.080646 |
| 8                | 1                | 0              | 2.638177                | -1.972527 | 0.351563  |
| 9                | 1                | 0              | 1.087357                | -2.649067 | 0.260436  |
| 10               | 7                | 0              | 1.985762                | 0.398424  | 0.003961  |
| 11               | 7                | 0              | -1.258929               | -1.416967 | -0.003722 |
| 12               | 7                | 0              | -2.163603               | 0.720289  | 0.008655  |
| 13               | 6                | 0              | 0.081962                | 1.931232  | -0.000441 |
| 14               | 1                | 0              | -3.349748               | -1.047223 | 0.028803  |

15 1 0 -0.278862 2.957981 0.008927

---

**C8-deprotonated N9H-amino Z3 (Z3-11) B3LYP/6-31+G(d)**

SCF Done: E(RB+HF-LYP) = -450.680097381 A.U.

Zero-point correction= 0.109455  
(Hartree/Particle)  
Thermal correction to Energy= 0.116707  
Thermal correction to Enthalpy= 0.117651  
Thermal correction to Gibbs Free Energy= 0.077858  
Sum of electronic and zero-point Energies= -450.570642  
Sum of electronic and thermal Energies= -450.563391  
Sum of electronic and thermal Enthalpies= -450.562446  
Sum of electronic and thermal Free Energies= -450.602239

|       | E (Thermal)<br>KCal/Mol | CV<br>Cal/Mol-Kelvin | S<br>Cal/Mol-Kelvin |
|-------|-------------------------|----------------------|---------------------|
| Total | 73.235                  | 29.353               | 83.751              |

---

| Center<br>Number | Atomic<br>Number | Atomic<br>Type | Coordinates (Angstroms) |           |           |
|------------------|------------------|----------------|-------------------------|-----------|-----------|
|                  |                  |                | X                       | Y         | Z         |
| 1                | 6                | 0              | -0.235726               | -0.502701 | -0.022164 |
| 2                | 6                | 0              | -0.797761               | 0.789212  | -0.014972 |
| 3                | 6                | 0              | 1.401534                | 1.681510  | 0.013270  |
| 4                | 6                | 0              | 1.167100                | -0.617213 | -0.020071 |
| 5                | 6                | 0              | -2.427643               | -0.868616 | 0.021449  |
| 6                | 1                | 0              | 2.100797                | 2.518237  | 0.034006  |
| 7                | 7                | 0              | 1.755683                | -1.885300 | -0.081943 |
| 8                | 1                | 0              | 2.665192                | -1.926774 | 0.363736  |
| 9                | 1                | 0              | 1.117867                | -2.618988 | 0.211688  |
| 10               | 7                | 0              | 1.973520                | 0.453531  | 0.007897  |
| 11               | 7                | 0              | -1.219098               | -1.478046 | 0.002651  |
| 12               | 7                | 0              | -2.148937               | 0.537068  | 0.004012  |
| 13               | 6                | 0              | 0.029249                | 1.927143  | -0.004111 |
| 14               | 1                | 0              | -0.354736               | 2.945809  | 0.002134  |
| 15               | 1                | 0              | -2.877818               | 1.234949  | 0.019709  |

---

**C2-deprotonated N9H-amino Z3 (Z3-12) B3LYP/6-31+G(d)**

SCF Done: E(RB+HF-LYP) = -450.636603127 A.U.

Zero-point correction= 0.108214  
(Hartree/Particle)  
Thermal correction to Energy= 0.115779  
Thermal correction to Enthalpy= 0.116723  
Thermal correction to Gibbs Free Energy= 0.076292  
Sum of electronic and zero-point Energies= -450.528389  
Sum of electronic and thermal Energies= -450.520824  
Sum of electronic and thermal Enthalpies= -450.519880  
Sum of electronic and thermal Free Energies= -450.560311

|       | E (Thermal) | CV             | S              |
|-------|-------------|----------------|----------------|
|       | KCal/Mol    | Cal/Mol-Kelvin | Cal/Mol-Kelvin |
| Total | 72.653      | 30.102         | 85.096         |

| Center Number | Atomic Number | Atomic Type | Coordinates (Angstroms) |           |           |
|---------------|---------------|-------------|-------------------------|-----------|-----------|
|               |               |             | X                       | Y         | Z         |
| 1             | 6             | 0           | -0.157393               | -0.482406 | -0.021369 |
| 2             | 6             | 0           | -0.735484               | 0.801170  | -0.009159 |
| 3             | 6             | 0           | 1.467604                | 1.859387  | 0.014492  |
| 4             | 6             | 0           | 1.251208                | -0.541557 | -0.018701 |
| 5             | 6             | 0           | -2.270868               | -0.835451 | 0.010335  |
| 6             | 7             | 0           | 1.910035                | -1.786791 | -0.085419 |
| 7             | 1             | 0           | 2.861438                | -1.698115 | 0.260972  |
| 8             | 1             | 0           | 1.397531                | -2.542740 | 0.357877  |
| 9             | 7             | 0           | 1.996114                | 0.559725  | 0.012907  |
| 10            | 7             | 0           | -1.133316               | -1.485192 | -0.005962 |
| 11            | 7             | 0           | -2.109470               | 0.538448  | 0.007238  |
| 12            | 6             | 0           | 0.047866                | 1.961358  | -0.002727 |
| 13            | 1             | 0           | -2.846666               | 1.227036  | 0.017557  |
| 14            | 1             | 0           | -3.253720               | -1.292819 | 0.025170  |
| 15            | 1             | 0           | -0.419722               | 2.948309  | -0.000151 |

### **C3-deprotonated N9H-amino Z3 (Z3-13) B3LYP/6-31+G(d)**

SCF Done: E(RB+HF-LYP) = -450.662815357 A.U.

|                                              |             |
|----------------------------------------------|-------------|
| Zero-point correction=                       | 0.109864    |
| (Hartree/Particle)                           |             |
| Thermal correction to Energy=                | 0.117121    |
| Thermal correction to Enthalpy=              | 0.118065    |
| Thermal correction to Gibbs Free Energy=     | 0.078211    |
| Sum of electronic and zero-point Energies=   | -450.552951 |
| Sum of electronic and thermal Energies=      | -450.545695 |
| Sum of electronic and thermal Enthalpies=    | -450.544751 |
| Sum of electronic and thermal Free Energies= | -450.584605 |

|       | E (Thermal) | CV             | S              |
|-------|-------------|----------------|----------------|
|       | KCal/Mol    | Cal/Mol-Kelvin | Cal/Mol-Kelvin |
| Total | 73.494      | 29.051         | 83.880         |

| Center Number | Atomic Number | Atomic Type | Coordinates (Angstroms) |           |           |
|---------------|---------------|-------------|-------------------------|-----------|-----------|
|               |               |             | X                       | Y         | Z         |
| 1             | 6             | 0           | -0.188064               | -0.470983 | -0.020986 |
| 2             | 6             | 0           | -0.712964               | 0.841185  | -0.007130 |
| 3             | 6             | 0           | 1.366354                | 1.737350  | 0.008424  |
| 4             | 6             | 0           | 1.215290                | -0.591040 | -0.019856 |
| 5             | 6             | 0           | -2.307323               | -0.737646 | 0.009221  |
| 6             | 1             | 0           | 2.108883                | 2.540703  | 0.026208  |
| 7             | 7             | 0           | 1.842861                | -1.859090 | -0.084726 |
| 8             | 1             | 0           | 2.774965                | -1.818017 | 0.317027  |
| 9             | 1             | 0           | 1.280380                | -2.590159 | 0.340722  |

|    |   |   |           |           |           |
|----|---|---|-----------|-----------|-----------|
| 10 | 7 | 0 | 1.973692  | 0.495569  | 0.003648  |
| 11 | 7 | 0 | -1.193556 | -1.441019 | -0.006611 |
| 12 | 7 | 0 | -2.095110 | 0.615737  | 0.006914  |
| 13 | 6 | 0 | -0.001565 | 2.054013  | 0.003339  |
| 14 | 1 | 0 | -2.784933 | 1.354958  | 0.019521  |
| 15 | 1 | 0 | -3.304882 | -1.163142 | 0.023882  |

**N1-protonated N9H-amino Z3 (Z3-14) B3LYP/6-31+G(d)**

SCF Done: E(RB+HF-LYP) = -451.672997623 A.U.

Zero-point correction= 0.137397  
(Hartree/Particle)  
Thermal correction to Energy= 0.144930  
Thermal correction to Enthalpy= 0.145874  
Thermal correction to Gibbs Free Energy= 0.105592  
Sum of electronic and zero-point Energies= -451.535600  
Sum of electronic and thermal Energies= -451.528068  
Sum of electronic and thermal Enthalpies= -451.527123  
Sum of electronic and thermal Free Energies= -451.567405

|       | E (Thermal)<br>KCal/Mol | CV<br>Cal/Mol-Kelvin | S<br>Cal/Mol-Kelvin |
|-------|-------------------------|----------------------|---------------------|
| Total | 90.945                  | 30.836               | 84.781              |

| Center<br>Number | Atomic<br>Number | Atomic<br>Type | Coordinates (Angstroms) |           |           |
|------------------|------------------|----------------|-------------------------|-----------|-----------|
|                  |                  |                | X                       | Y         | Z         |
| 1                | 6                | 0              | -0.246123               | -0.491503 | -0.000101 |
| 2                | 6                | 0              | -0.749831               | 0.819017  | -0.000169 |
| 3                | 6                | 0              | 1.436440                | 1.691201  | 0.000138  |
| 4                | 6                | 0              | 1.143776                | -0.722301 | -0.000097 |
| 5                | 6                | 0              | -2.353272               | -0.711929 | 0.000195  |
| 6                | 7                | 0              | 1.671979                | -1.951941 | -0.000124 |
| 7                | 7                | 0              | 1.924166                | 0.395243  | 0.000185  |
| 8                | 7                | 0              | -1.254397               | -1.425687 | -0.000003 |
| 9                | 7                | 0              | -2.107487               | 0.648737  | 0.000040  |
| 10               | 6                | 0              | 0.096138                | 1.953755  | -0.000130 |
| 11               | 1                | 0              | -2.811444               | 1.377872  | -0.000031 |
| 12               | 1                | 0              | -3.360169               | -1.108466 | 0.000262  |
| 13               | 1                | 0              | -0.266096               | 2.974907  | -0.000350 |
| 14               | 1                | 0              | 2.194708                | 2.463925  | 0.000123  |
| 15               | 1                | 0              | 1.041520                | -2.746182 | -0.000350 |
| 16               | 1                | 0              | 2.665874                | -2.138233 | 0.000584  |
| 17               | 1                | 0              | 2.933021                | 0.282275  | 0.000051  |

**N1-protonated N9H-amino Z3 (Z3-14) B3LYP/6-31+G(d) (cpcm, water, RADII=UAKS)**

Total free energy in solution:  
with all non electrostatic terms (a.u.) = -451.776854  
(Polarized solute)-Solvent (kcal/mol) = -69.40

Cavitation energy (kcal/mol) = 16.97  
 Dispersion energy (kcal/mol) = -21.39  
 Repulsion energy (kcal/mol) = 5.16  
 Total non electrostatic (kcal/mol) = 0.74

**N7-protonated N9H-amino Z3 (Z3-15) B3LYP/6-31+G(d)**

SCF Done: E(RB+HF-LYP) = -451.651316608 A.U.

Zero-point correction= 0.136987  
 (Hartree/Particle)  
 Thermal correction to Energy= 0.144517  
 Thermal correction to Enthalpy= 0.145461  
 Thermal correction to Gibbs Free Energy= 0.105103  
 Sum of electronic and zero-point Energies= -451.514330  
 Sum of electronic and thermal Energies= -451.506799  
 Sum of electronic and thermal Enthalpies= -451.505855  
 Sum of electronic and thermal Free Energies= -451.546214

|       | E (Thermal)<br>KCal/Mol | CV<br>Cal/Mol-Kelvin | S<br>Cal/Mol-Kelvin |
|-------|-------------------------|----------------------|---------------------|
| Total | 90.686                  | 30.796               | 84.942              |

| Center<br>Number | Atomic<br>Number | Atomic<br>Type | Coordinates (Angstroms) |           |           |
|------------------|------------------|----------------|-------------------------|-----------|-----------|
|                  |                  |                | X                       | Y         | Z         |
| 1                | 6                | 0              | 0.161701                | -0.471809 | 0.008878  |
| 2                | 6                | 0              | 0.702068                | 0.821776  | 0.023879  |
| 3                | 6                | 0              | -1.474272               | 1.672396  | -0.018348 |
| 4                | 6                | 0              | -1.245258               | -0.648845 | 0.007438  |
| 5                | 6                | 0              | 2.384513                | -0.653716 | -0.017733 |
| 6                | 7                | 0              | -1.850450               | -1.873316 | -0.038918 |
| 7                | 7                | 0              | -2.013989               | 0.440223  | -0.016370 |
| 8                | 7                | 0              | 1.249320                | -1.352067 | -0.021326 |
| 9                | 7                | 0              | 2.088424                | 0.651304  | 0.015469  |
| 10               | 6                | 0              | -0.109889               | 1.955601  | 0.015625  |
| 11               | 1                | 0              | 2.779331                | 1.394333  | 0.023840  |
| 12               | 1                | 0              | 3.380916                | -1.072126 | -0.040975 |
| 13               | 1                | 0              | 0.270737                | 2.970018  | 0.025443  |
| 14               | 1                | 0              | -2.191872               | 2.487927  | -0.041604 |
| 15               | 1                | 0              | -1.416000               | -2.681763 | 0.386012  |
| 16               | 1                | 0              | -2.862139               | -1.850072 | 0.037636  |
| 17               | 1                | 0              | 1.212722                | -2.363744 | -0.080764 |

**N9-protonated N9H-amino Z3 (Z3-16) B3LYP/6-31+G(d)**

SCF Done: E(RB+HF-LYP) = -451.592204494 A.U.

Zero-point correction= 0.135617  
 (Hartree/Particle)  
 Thermal correction to Energy= 0.143293  
 Thermal correction to Enthalpy= 0.144237  
 Thermal correction to Gibbs Free Energy= 0.103594  
 Sum of electronic and zero-point Energies= -451.456588  
 Sum of electronic and thermal Energies= -451.448911

Sum of electronic and thermal Enthalpies= -451.447967  
 Sum of electronic and thermal Free Energies= -451.488610

|       |  | E (Thermal) | CV             | S              |
|-------|--|-------------|----------------|----------------|
|       |  | KCal/Mol    | Cal/Mol-Kelvin | Cal/Mol-Kelvin |
| Total |  | 89.918      | 31.201         | 85.541         |

---

| Center Number | Atomic Number | Atomic Type | Coordinates (Angstroms) |           |           |
|---------------|---------------|-------------|-------------------------|-----------|-----------|
|               |               |             | X                       | Y         | Z         |
| 1             | 6             | 0           | 0.152888                | -0.493965 | 0.000067  |
| 2             | 6             | 0           | 0.673865                | 0.798682  | 0.000096  |
| 3             | 6             | 0           | -1.484753               | 1.663774  | -0.000037 |
| 4             | 6             | 0           | -1.253550               | -0.654005 | 0.000066  |
| 5             | 6             | 0           | 2.289727                | -0.906931 | -0.000312 |
| 6             | 7             | 0           | -1.858535               | -1.852692 | -0.000027 |
| 7             | 7             | 0           | -2.031825               | 0.455048  | -0.000006 |
| 8             | 7             | 0           | 1.157529                | -1.471449 | 0.000013  |
| 9             | 7             | 0           | 2.149100                | 0.628763  | 0.000150  |
| 10            | 6             | 0           | -0.093796               | 1.939160  | -0.000028 |
| 11            | 1             | 0           | 2.598281                | 1.045024  | -0.828350 |
| 12            | 1             | 0           | 3.286515                | -1.328931 | -0.000532 |
| 13            | 1             | 0           | 0.288279                | 2.953473  | -0.000292 |
| 14            | 1             | 0           | -2.185616               | 2.495283  | -0.000348 |
| 15            | 1             | 0           | -1.335557               | -2.717471 | 0.000615  |
| 16            | 1             | 0           | -2.870104               | -1.889498 | -0.000345 |
| 17            | 1             | 0           | 2.598041                | 1.044150  | 0.829231  |

**N10-protonated N9H-amino Z3 (Z3-17) B3LYP/6-31+G(d)**

SCF Done: E(RB+HF-LYP) = -451.641986137 A.U.

Zero-point correction= 0.138353  
 (Hartree/Particle)  
 Thermal correction to Energy= 0.145967  
 Thermal correction to Enthalpy= 0.146911  
 Thermal correction to Gibbs Free Energy= 0.105916  
 Sum of electronic and zero-point Energies= -451.503633  
 Sum of electronic and thermal Energies= -451.496019  
 Sum of electronic and thermal Enthalpies= -451.495075  
 Sum of electronic and thermal Free Energies= -451.536070

|       |  | E (Thermal) | CV             | S              |
|-------|--|-------------|----------------|----------------|
|       |  | KCal/Mol    | Cal/Mol-Kelvin | Cal/Mol-Kelvin |
| Total |  | 91.596      | 29.595         | 86.281         |

---

| Center Number | Atomic Number | Atomic Type | Coordinates (Angstroms) |           |           |
|---------------|---------------|-------------|-------------------------|-----------|-----------|
|               |               |             | X                       | Y         | Z         |
| 1             | 6             | 0           | 0.202404                | -0.473402 | -0.000241 |
| 2             | 6             | 0           | 0.829202                | 0.795872  | 0.000051  |
| 3             | 6             | 0           | -1.319677               | 1.799553  | -0.000035 |
| 4             | 6             | 0           | -1.182983               | -0.472514 | -0.000288 |
| 5             | 6             | 0           | 2.279933                | -0.885934 | -0.000026 |
| 6             | 7             | 0           | -1.892229               | -1.787971 | 0.000458  |



|    |   |   |           |           |           |
|----|---|---|-----------|-----------|-----------|
| 7  | 7 | 0 | -1.939069 | 0.594899  | -0.000492 |
| 8  | 7 | 0 | 1.118816  | -1.501318 | -0.000299 |
| 9  | 7 | 0 | 2.172122  | 0.487553  | 0.000214  |
| 10 | 6 | 0 | 0.067339  | 1.966519  | 0.000138  |
| 11 | 1 | 0 | 2.947115  | 1.139984  | 0.000019  |
| 12 | 1 | 0 | 3.243874  | -1.378655 | 0.000169  |
| 13 | 1 | 0 | 0.503213  | 2.960146  | 0.000764  |
| 14 | 1 | 0 | -1.976712 | 2.662957  | 0.000636  |
| 15 | 1 | 0 | -1.201857 | -2.554477 | 0.000395  |
| 16 | 1 | 0 | -2.495004 | -1.881094 | 0.828931  |
| 17 | 1 | 0 | -2.495416 | -1.881561 | -0.827685 |

-----

**N10-deprotonated N7H-amino (N10H\_N1side) Z3 (Z3-18) B3LYP/6-31+G(d)**

SCF Done: E(RB3LYP) = -450.713074310

Zero-point correction= 0.109660  
(Hartree/Particle)  
Thermal correction to Energy= 0.116644  
Thermal correction to Enthalpy= 0.117588  
Thermal correction to Gibbs Free Energy= 0.078149  
Sum of electronic and zero-point Energies= -450.603415  
Sum of electronic and thermal Energies= -450.596431  
Sum of electronic and thermal Enthalpies= -450.595486  
Sum of electronic and thermal Free Energies= -450.634925

|       | E (Thermal) | CV             | S              |
|-------|-------------|----------------|----------------|
|       | KCal/Mol    | Cal/Mol-Kelvin | Cal/Mol-Kelvin |
| Total | 73.195      | 28.193         | 83.006         |

-----

| Center<br>Number | Atomic<br>Number | Atomic<br>Type | Coordinates (Angstroms) |           |           |
|------------------|------------------|----------------|-------------------------|-----------|-----------|
|                  |                  |                | X                       | Y         | Z         |
| 1                | 6                | 0              | 0.209285                | -0.442088 | 0.000071  |
| 2                | 6                | 0              | 0.672879                | 0.872137  | -0.000003 |
| 3                | 6                | 0              | -1.615879               | 1.490404  | -0.000092 |
| 4                | 6                | 0              | -1.177798               | -0.830584 | 0.000008  |
| 5                | 6                | 0              | 2.414941                | -0.391130 | -0.000113 |
| 6                | 1                | 0              | -2.404236               | 2.248908  | 0.000021  |
| 7                | 1                | 0              | 3.435046                | -0.757030 | -0.000038 |
| 8                | 7                | 0              | 1.339773                | -1.235224 | -0.000099 |
| 9                | 7                | 0              | 2.067527                | 0.885241  | 0.000111  |
| 10               | 7                | 0              | -1.490196               | -2.117446 | -0.000015 |
| 11               | 6                | 0              | -0.289504               | 1.919552  | 0.000050  |
| 12               | 1                | 0              | -0.018741               | 2.971210  | 0.000041  |
| 13               | 7                | 0              | -2.074098               | 0.218821  | -0.000042 |
| 14               | 1                | 0              | 1.315836                | -2.245381 | 0.000378  |
| 15               | 1                | 0              | -2.512494               | -2.187209 | 0.000381  |

-----

**N10-deprotonated N7H-amino (N10H\_N7side) Z3 (Z3-19) B3LYP/6-31+G(d)**

SCF Done: E(RB3LYP) = -450.699727143

Zero-point correction= 0.108542  
(Hartree/Particle)  
Thermal correction to Energy= 0.115779  
Thermal correction to Enthalpy= 0.116724  
Thermal correction to Gibbs Free Energy= 0.076766  
Sum of electronic and zero-point Energies= -450.591186  
Sum of electronic and thermal Energies= -450.583948  
Sum of electronic and thermal Enthalpies= -450.583004  
Sum of electronic and thermal Free Energies= -450.622961

|       | E (Thermal)<br>KCal/Mol | CV<br>Cal/Mol-Kelvin | S<br>Cal/Mol-Kelvin |
|-------|-------------------------|----------------------|---------------------|
| Total | 72.653                  | 28.936               | 84.097              |

| Center<br>Number | Atomic<br>Number | Atomic<br>Type | Coordinates (Angstroms) |           |           |
|------------------|------------------|----------------|-------------------------|-----------|-----------|
|                  |                  |                | X                       | Y         | Z         |
| 1                | 6                | 0              | 0.202302                | 0.445874  | 0.000045  |
| 2                | 6                | 0              | 0.642471                | -0.881420 | 0.000199  |
| 3                | 6                | 0              | -1.648372               | -1.463894 | 0.000246  |
| 4                | 6                | 0              | -1.189468               | 0.853496  | 0.000226  |
| 5                | 6                | 0              | 2.419204                | 0.329959  | 0.000014  |
| 6                | 1                | 0              | -2.447448               | -2.211652 | -0.000613 |
| 7                | 1                | 0              | 3.448175                | 0.670918  | -0.000373 |
| 8                | 7                | 0              | 1.367861                | 1.206203  | 0.000332  |
| 9                | 7                | 0              | 2.037299                | -0.931919 | -0.000488 |
| 10               | 7                | 0              | -1.624133               | 2.109503  | -0.000537 |
| 11               | 6                | 0              | -0.327007               | -1.914837 | 0.000032  |
| 12               | 1                | 0              | -0.066703               | -2.968942 | -0.000238 |
| 13               | 7                | 0              | -2.085850               | -0.192739 | 0.000057  |
| 14               | 1                | 0              | 1.420859                | 2.214234  | 0.001011  |
| 15               | 1                | 0              | -0.815902               | 2.743034  | 0.000088  |

### **C8-deprotonated N7H-amino Z3 (Z3-20) B3LYP/6-31+G(d)**

SCF Done: E(RB3LYP) = -450.676049169

Zero-point correction= 0.109267  
(Hartree/Particle)  
Thermal correction to Energy= 0.116634  
Thermal correction to Enthalpy= 0.117579  
Thermal correction to Gibbs Free Energy= 0.077529  
Sum of electronic and zero-point Energies= -450.566782  
Sum of electronic and thermal Energies= -450.559415  
Sum of electronic and thermal Enthalpies= -450.558471  
Sum of electronic and thermal Free Energies= -450.598520

|       | E (Thermal)<br>KCal/Mol | CV<br>Cal/Mol-Kelvin | S<br>Cal/Mol-Kelvin |
|-------|-------------------------|----------------------|---------------------|
| Total | 73.189                  | 29.422               | 84.292              |

| Center Number | Atomic Number | Atomic Type | Coordinates (Angstroms) |           |           |
|---------------|---------------|-------------|-------------------------|-----------|-----------|
|               |               |             | X                       | Y         | Z         |
| 1             | 6             | 0           | 0.225743                | -0.484579 | -0.021386 |
| 2             | 6             | 0           | 0.842898                | 0.790504  | 0.014560  |
| 3             | 6             | 0           | -1.373602               | 1.694837  | -0.009411 |
| 4             | 6             | 0           | -1.164830               | -0.605997 | -0.016208 |
| 5             | 6             | 0           | 2.531440                | -0.661895 | -0.005858 |
| 6             | 1             | 0           | -2.067408               | 2.536143  | -0.014664 |
| 7             | 7             | 0           | 1.298189                | -1.361412 | -0.018638 |
| 8             | 7             | 0           | 2.211583                | 0.662033  | 0.026925  |
| 9             | 7             | 0           | -1.803205               | -1.873968 | -0.061558 |
| 10            | 1             | 0           | -2.787602               | -1.765605 | 0.169586  |
| 11            | 1             | 0           | -1.370665               | -2.551998 | 0.560905  |
| 12            | 6             | 0           | -0.001962               | 1.921203  | 0.015101  |
| 13            | 1             | 0           | 0.402546                | 2.930589  | 0.031934  |
| 14            | 7             | 0           | -1.961104               | 0.471704  | -0.014311 |
| 15            | 1             | 0           | 1.246775                | -2.362067 | -0.135477 |

### C2-deprotonated N7H-amino Z3 (Z3-21) B3LYP/6-31+G(d)

SCF Done: E(RB3LYP) = -450.629468796 A.U. after

Zero-point correction= 0.108160

(Hartree/Particle)

Thermal correction to Energy= 0.115772

Thermal correction to Enthalpy= 0.116716

Thermal correction to Gibbs Free Energy= 0.076153

Sum of electronic and zero-point Energies= -450.521308

Sum of electronic and thermal Energies= -450.513697

Sum of electronic and thermal Enthalpies= -450.512753

Sum of electronic and thermal Free Energies= -450.553316

|       | E (Thermal) | CV             | S              |
|-------|-------------|----------------|----------------|
| Total | KCal/Mol    | Cal/Mol-Kelvin | Cal/Mol-Kelvin |
|       | 72.648      | 29.935         | 85.371         |

| Center Number | Atomic Number | Atomic Type | Coordinates (Angstroms) |           |           |
|---------------|---------------|-------------|-------------------------|-----------|-----------|
|               |               |             | X                       | Y         | Z         |
| 1             | 6             | 0           | 0.159717                | -0.443208 | -0.000417 |
| 2             | 6             | 0           | 0.761216                | 0.829457  | 0.029148  |
| 3             | 6             | 0           | -1.483653               | 1.853671  | -0.026610 |
| 4             | 6             | 0           | -1.231764               | -0.545795 | -0.010476 |
| 5             | 6             | 0           | 2.369383                | -0.612305 | -0.024418 |
| 6             | 7             | 0           | 1.215254                | -1.365486 | -0.000475 |
| 7             | 7             | 0           | 2.163932                | 0.680324  | 0.020552  |
| 8             | 7             | 0           | -1.873261               | -1.828848 | -0.049704 |
| 9             | 1             | 0           | -2.877601               | -1.641800 | -0.049532 |
| 10            | 1             | 0           | -1.657462               | -2.378581 | 0.782725  |

|    |   |   |           |           |           |
|----|---|---|-----------|-----------|-----------|
| 11 | 6 | 0 | -0.066211 | 1.963847  | 0.031020  |
| 12 | 1 | 0 | 0.392961  | 2.952568  | 0.067590  |
| 13 | 7 | 0 | -1.991305 | 0.545432  | -0.039377 |
| 14 | 1 | 0 | 1.142350  | -2.340154 | -0.254451 |
| 15 | 1 | 0 | 3.345287  | -1.085997 | -0.052783 |

**C3-deprotonated N7H-amino Z3 (Z3-22) B3LYP/6-31+G(d)**

SCF Done: E(RB3LYP) = -450.643129177  
 Zero-point correction= 0.108882  
 (Hartree/Particle)  
 Thermal correction to Energy= 0.116381  
 Thermal correction to Enthalpy= 0.117326  
 Thermal correction to Gibbs Free Energy= 0.076950  
 Sum of electronic and zero-point Energies= -450.534247  
 Sum of electronic and thermal Energies= -450.526748  
 Sum of electronic and thermal Enthalpies= -450.525804  
 Sum of electronic and thermal Free Energies= -450.566180

|       | E (Thermal) | CV             | S              |
|-------|-------------|----------------|----------------|
|       | KCal/Mol    | Cal/Mol-Kelvin | Cal/Mol-Kelvin |
| Total | 73.030      | 29.456         | 84.978         |

| Center Number | Atomic Number | Atomic Type | Coordinates (Angstroms) |           |           |
|---------------|---------------|-------------|-------------------------|-----------|-----------|
|               |               |             | X                       | Y         | Z         |
| 1             | 6             | 0           | 0.194535                | -0.412848 | -0.008323 |
| 2             | 6             | 0           | 0.742569                | 0.894623  | 0.029848  |
| 3             | 6             | 0           | -1.409311               | 1.712731  | -0.019146 |
| 4             | 6             | 0           | -1.187656               | -0.600303 | -0.010442 |
| 5             | 6             | 0           | 2.401601                | -0.510830 | -0.021062 |
| 6             | 7             | 0           | 1.266159                | -1.305243 | -0.004678 |
| 7             | 7             | 0           | 2.157023                | 0.768590  | 0.029671  |
| 8             | 7             | 0           | -1.765553               | -1.916758 | -0.049948 |
| 9             | 6             | 0           | -0.046306               | 2.069773  | 0.028781  |
| 10            | 7             | 0           | -1.983557               | 0.460681  | -0.023141 |
| 11            | 1             | 0           | 3.389836                | -0.959642 | -0.047149 |
| 12            | 1             | 0           | -2.172189               | 2.496716  | -0.049881 |
| 13            | 1             | 0           | -1.555368               | -2.434095 | 0.805247  |
| 14            | 1             | 0           | -2.777374               | -1.795208 | -0.090704 |
| 15            | 1             | 0           | 1.224005                | -2.277537 | -0.278778 |

**N1-protonated N7H-amino Z3 (Z3-23) B3LYP/6-31+G(d)**

SCF Done: E(RB3LYP) = -451.659243466  
 Zero-point correction= 0.136110  
 (Hartree/Particle)  
 Thermal correction to Energy= 0.144317  
 Thermal correction to Enthalpy= 0.145261  
 Thermal correction to Gibbs Free Energy= 0.103141  
 Sum of electronic and zero-point Energies= -451.523133

Sum of electronic and thermal Energies= -451.514927  
 Sum of electronic and thermal Enthalpies= -451.513982  
 Sum of electronic and thermal Free Energies= -451.556103

|       | E (Thermal) | CV             | S              |
|-------|-------------|----------------|----------------|
|       | KCal/Mol    | Cal/Mol-Kelvin | Cal/Mol-Kelvin |
| Total | 90.560      | 31.891         | 88.650         |

---

| Center Number | Atomic Number | Atomic Type | Coordinates (Angstroms) |           |          |
|---------------|---------------|-------------|-------------------------|-----------|----------|
|               |               |             | X                       | Y         | Z        |
| 1             | 6             | 0           | 0.000000                | 0.541395  | 0.000000 |
| 2             | 6             | 0           | -1.065944               | -0.388651 | 0.000000 |
| 3             | 6             | 0           | 0.503020                | -2.160075 | 0.000000 |
| 4             | 6             | 0           | 1.339416                | 0.129940  | 0.000000 |
| 5             | 6             | 0           | -1.961403               | 1.543562  | 0.000000 |
| 6             | 7             | 0           | -0.611525               | 1.781825  | 0.000000 |
| 7             | 7             | 0           | -2.267355               | 0.264359  | 0.000000 |
| 8             | 7             | 0           | 2.419806                | 0.942344  | 0.000000 |
| 9             | 6             | 0           | -0.806763               | -1.780349 | 0.000000 |
| 10            | 1             | 0           | -1.608259               | -2.509170 | 0.000000 |
| 11            | 7             | 0           | 1.519536                | -1.221179 | 0.000000 |
| 12            | 1             | 0           | -2.678621               | 2.354823  | 0.000000 |
| 13            | 1             | 0           | 0.835472                | -3.190490 | 0.000000 |
| 14            | 1             | 0           | 2.470684                | -1.575636 | 0.000000 |
| 15            | 1             | 0           | 3.367233                | 0.587116  | 0.000000 |
| 16            | 1             | 0           | 2.324211                | 1.947318  | 0.000000 |
| 17            | 1             | 0           | -0.183915               | 2.699660  | 0.000000 |

**N7-protonated N7H-amino Z3 (Z3-24) B3LYP/6-31+G(d)**

SCF Done: E(RB3LYP) = -451.584683200

Zero-point correction= 0.135560  
 (Hartree/Particle)  
 Thermal correction to Energy= 0.143288  
 Thermal correction to Enthalpy= 0.144232  
 Thermal correction to Gibbs Free Energy= 0.103408  
 Sum of electronic and zero-point Energies= -451.449124  
 Sum of electronic and thermal Energies= -451.441395  
 Sum of electronic and thermal Enthalpies= -451.440451  
 Sum of electronic and thermal Free Energies= -451.481275

|       | E (Thermal) | CV             | S              |
|-------|-------------|----------------|----------------|
|       | KCal/Mol    | Cal/Mol-Kelvin | Cal/Mol-Kelvin |
| Total | 89.915      | 31.091         | 85.921         |

---

| Center Number | Atomic Number | Atomic Type | Coordinates (Angstroms) |           |           |
|---------------|---------------|-------------|-------------------------|-----------|-----------|
|               |               |             | X                       | Y         | Z         |
| 1             | 6             | 0           | 0.166547                | -0.435558 | -0.033718 |
| 2             | 6             | 0           | 0.689651                | 0.861425  | -0.028495 |

|    |   |   |           |           |           |
|----|---|---|-----------|-----------|-----------|
| 3  | 6 | 0 | -1.523193 | 1.642250  | 0.014344  |
| 4  | 6 | 0 | -1.212171 | -0.670434 | -0.012478 |
| 5  | 6 | 0 | 2.495153  | -0.359286 | 0.023615  |
| 6  | 1 | 0 | -2.260480 | 2.440614  | 0.039842  |
| 7  | 1 | 0 | 3.499907  | -0.765426 | 0.049094  |
| 8  | 7 | 0 | 1.318938  | -1.358201 | 0.014203  |
| 9  | 7 | 0 | 2.108955  | 0.838338  | -0.005657 |
| 10 | 7 | 0 | -1.804366 | -1.899600 | 0.051951  |
| 11 | 1 | 0 | -2.817044 | -1.891132 | -0.015505 |
| 12 | 1 | 0 | -1.360919 | -2.719948 | -0.338791 |
| 13 | 6 | 0 | -0.150348 | 1.958204  | -0.013078 |
| 14 | 1 | 0 | 0.215027  | 2.978147  | -0.009004 |
| 15 | 7 | 0 | -2.023704 | 0.407632  | 0.012742  |
| 16 | 1 | 0 | 1.396553  | -1.987894 | -0.799056 |
| 17 | 1 | 0 | 1.334353  | -1.951151 | 0.859613  |

**N10-protonated N7H-amino Z3 (Z3-25) B3LYP/6-31+G(d)**

SCF Done: E(RB3LYP) = -451.622462063

Zero-point correction= 0.137605  
(Hartree/Particle)  
Thermal correction to Energy= 0.145226  
Thermal correction to Enthalpy= 0.146170  
Thermal correction to Gibbs Free Energy= 0.105455  
Sum of electronic and zero-point Energies= -451.484857  
Sum of electronic and thermal Energies= -451.477236  
Sum of electronic and thermal Enthalpies= -451.476292  
Sum of electronic and thermal Free Energies= -451.517007

|       | E (Thermal) | CV             | S              |
|-------|-------------|----------------|----------------|
|       | KCal/Mol    | Cal/Mol-Kelvin | Cal/Mol-Kelvin |
| Total | 91.131      | 30.059         | 85.692         |

| Center<br>Number | Atomic<br>Number | Atomic<br>Type | Coordinates (Angstroms) |           |           |
|------------------|------------------|----------------|-------------------------|-----------|-----------|
|                  |                  |                | X                       | Y         | Z         |
| 1                | 6                | 0              | 0.213782                | -0.491183 | 0.000119  |
| 2                | 6                | 0              | 0.862192                | 0.780096  | 0.000022  |
| 3                | 6                | 0              | -1.287590               | 1.811669  | -0.000026 |
| 4                | 6                | 0              | -1.174596               | -0.481185 | 0.000051  |
| 5                | 6                | 0              | 2.417812                | -0.680159 | 0.000050  |
| 6                | 1                | 0              | -1.942355               | 2.676529  | -0.000043 |
| 7                | 1                | 0              | 3.381589                | -1.174234 | -0.000018 |
| 8                | 7                | 0              | 1.241818                | -1.412961 | -0.000158 |
| 9                | 7                | 0              | 2.230964                | 0.611377  | -0.000016 |
| 10               | 7                | 0              | -2.023509               | -1.718259 | -0.000053 |
| 11               | 1                | 0              | -2.997461               | -1.373559 | -0.000871 |
| 12               | 1                | 0              | -1.894378               | -2.306612 | -0.834263 |
| 13               | 6                | 0              | 0.098518                | 1.950534  | -0.000044 |
| 14               | 1                | 0              | 0.570107                | 2.927368  | -0.000079 |
| 15               | 7                | 0              | -1.905767               | 0.611431  | 0.000072  |

|    |   |   |           |           |          |
|----|---|---|-----------|-----------|----------|
| 16 | 1 | 0 | 1.192835  | -2.423340 | 0.000472 |
| 17 | 1 | 0 | -1.895574 | -2.305892 | 0.834855 |

---

**Z1 (1-deazaadenine): neutral, protonated and deprotonated species**

**Amino N9H Z1 (Z1-1) B3LYP/6-31+G(d)**

SCF Done: E(RB+HF-LYP) = -451.290354912 A.U.

|                                              |             |
|----------------------------------------------|-------------|
| Zero-point correction=                       | 0.123743    |
| (Hartree/Particle)                           |             |
| Thermal correction to Energy=                | 0.131065    |
| Thermal correction to Enthalpy=              | 0.132010    |
| Thermal correction to Gibbs Free Energy=     | 0.092129    |
| Sum of electronic and zero-point Energies=   | -451.166612 |
| Sum of electronic and thermal Energies=      | -451.159289 |
| Sum of electronic and thermal Enthalpies=    | -451.158345 |
| Sum of electronic and thermal Free Energies= | -451.198226 |

|       | E (Thermal) | CV             | S              |
|-------|-------------|----------------|----------------|
|       | KCal/Mol    | Cal/Mol-Kelvin | Cal/Mol-Kelvin |
| Total | 82.245      | 29.829         | 83.936         |

---

| Center Number | Atomic Number | Atomic Type | Coordinates (Angstroms) |           |           |
|---------------|---------------|-------------|-------------------------|-----------|-----------|
|               |               |             | X                       | Y         | Z         |
| 1             | 6             | 0           | 0.171392                | -0.512525 | -0.006323 |
| 2             | 6             | 0           | 0.712005                | 0.786384  | -0.003781 |
| 3             | 6             | 0           | -1.273202               | 1.788883  | 0.004786  |
| 4             | 6             | 0           | -1.946509               | 0.556810  | 0.002590  |
| 5             | 6             | 0           | -1.229839               | -0.654211 | -0.006081 |
| 6             | 6             | 0           | 2.287502                | -0.776451 | 0.004875  |
| 7             | 1             | 0           | -1.857568               | 2.706743  | 0.009872  |
| 8             | 1             | 0           | -3.033507               | 0.547591  | -0.000919 |
| 9             | 1             | 0           | 3.283856                | -1.199611 | 0.011026  |
| 10            | 7             | 0           | 0.059651                | 1.950080  | 0.000947  |
| 11            | 7             | 0           | 1.173759                | -1.470994 | 0.001007  |
| 12            | 7             | 0           | 2.081291                | 0.584674  | 0.001692  |
| 13            | 1             | 0           | 2.782988                | 1.312244  | 0.004460  |
| 14            | 7             | 0           | -1.815401               | -1.895901 | -0.058916 |
| 15            | 1             | 0           | -1.221164               | -2.687855 | 0.150964  |
| 16            | 1             | 0           | -2.777793               | -1.987466 | 0.235093  |

---

**Amino N3H Z1 (Z1-2) B3LYP/6-31+G(d)**

SCF Done: E(RB+HF-LYP) = -451.279813940 A.U.

|                                          |          |
|------------------------------------------|----------|
| Zero-point correction=                   | 0.123770 |
| (Hartree/Particle)                       |          |
| Thermal correction to Energy=            | 0.131230 |
| Thermal correction to Enthalpy=          | 0.132174 |
| Thermal correction to Gibbs Free Energy= | 0.091951 |

Sum of electronic and zero-point Energies= -451.156043  
 Sum of electronic and thermal Energies= -451.148584  
 Sum of electronic and thermal Enthalpies= -451.147640  
 Sum of electronic and thermal Free Energies= -451.187863

|       | E (Thermal)<br>KCal/Mol | CV<br>Cal/Mol-Kelvin | S<br>Cal/Mol-Kelvin |
|-------|-------------------------|----------------------|---------------------|
| Total | 82.348                  | 29.928               | 84.656              |

| Center<br>Number | Atomic<br>Number | Atomic<br>Type | Coordinates (Angstroms) |           |           |
|------------------|------------------|----------------|-------------------------|-----------|-----------|
|                  |                  |                | X                       | Y         | Z         |
| 1                | 6                | 0              | 0.225969                | -0.546283 | -0.006396 |
| 2                | 6                | 0              | 0.799095                | 0.755169  | -0.003742 |
| 3                | 6                | 0              | -1.353740               | 1.721016  | 0.003453  |
| 4                | 6                | 0              | -1.947093               | 0.476009  | 0.002578  |
| 5                | 6                | 0              | -1.162975               | -0.717159 | -0.004024 |
| 6                | 6                | 0              | 2.331662                | -0.667630 | 0.004817  |
| 7                | 7                | 0              | -0.001124               | 1.866261  | -0.001041 |
| 8                | 7                | 0              | 1.249401                | -1.457379 | 0.000686  |
| 9                | 7                | 0              | 2.132741                | 0.687977  | 0.003121  |
| 10               | 7                | 0              | -1.718147               | -1.959884 | -0.039960 |
| 11               | 1                | 0              | 3.335796                | -1.076464 | 0.009396  |
| 12               | 1                | 0              | -3.030984               | 0.417850  | 0.000305  |
| 13               | 1                | 0              | -1.934032               | 2.636015  | 0.007169  |
| 14               | 1                | 0              | -2.695339               | -2.096449 | 0.172299  |
| 15               | 1                | 0              | -1.100584               | -2.751331 | 0.088327  |
| 16               | 1                | 0              | 0.427538                | 2.784825  | 0.002742  |

**Amino N3H Z1 (Z1-2) B3LYP/6-31+G(d) cpcm, water, RADII=UAKS**

Total free energy in solution:  
 with all non electrostatic terms (a.u.) = -451.312371

---

(Polarized solute)-Solvent (kcal/mol) = -26.16

---

Cavitation energy (kcal/mol) = 16.89  
 Dispersion energy (kcal/mol) = -20.51  
 Repulsion energy (kcal/mol) = 4.57  
 Total non electrostatic (kcal/mol) = 0.94

**Amino N7H Z1 (Z1-3) B3LYP/6-31+G(d)**

SCF Done: E(RB+HF-LYP) = -451.276749462 A.U.

Zero-point correction= 0.123384  
 (Hartree/Particle)  
 Thermal correction to Energy= 0.130810  
 Thermal correction to Enthalpy= 0.131754  
 Thermal correction to Gibbs Free Energy= 0.091617  
 Sum of electronic and zero-point Energies= -451.153366  
 Sum of electronic and thermal Energies= -451.145939  
 Sum of electronic and thermal Enthalpies= -451.144995  
 Sum of electronic and thermal Free Energies= -451.185133



|       | E (Thermal) |  | CV             | S              |  |
|-------|-------------|--|----------------|----------------|--|
|       | KCal/Mol    |  | Cal/Mol-Kelvin | Cal/Mol-Kelvin |  |
| Total | 82.085      |  | 29.882         | 84.477         |  |

---

| Center Number | Atomic Number | Atomic Type | Coordinates (Angstroms) |           |           |
|---------------|---------------|-------------|-------------------------|-----------|-----------|
|               |               |             | X                       | Y         | Z         |
| 1             | 6             | 0           | 0.176335                | -0.473864 | -0.008404 |
| 2             | 6             | 0           | 0.741951                | 0.823326  | 0.016409  |
| 3             | 6             | 0           | -1.292502               | 1.779185  | -0.009493 |
| 4             | 6             | 0           | -1.947308               | 0.532535  | -0.018150 |
| 5             | 6             | 0           | -1.211804               | -0.658885 | -0.004325 |
| 6             | 6             | 0           | 2.385381                | -0.546091 | -0.009597 |
| 7             | 7             | 0           | 0.029070                | 1.958882  | 0.018185  |
| 8             | 7             | 0           | 1.258048                | -1.341365 | -0.008878 |
| 9             | 7             | 0           | 2.127734                | 0.735140  | 0.020787  |
| 10            | 7             | 0           | -1.795994               | -1.928035 | -0.055537 |
| 11            | 1             | 0           | 3.376653                | -0.981947 | -0.026294 |
| 12            | 1             | 0           | -3.034169               | 0.500356  | -0.025712 |
| 13            | 1             | 0           | -1.895831               | 2.685340  | -0.015213 |
| 14            | 1             | 0           | -2.796457               | -1.933431 | 0.110010  |
| 15            | 1             | 0           | -1.338098               | -2.640681 | 0.502654  |
| 16            | 1             | 0           | 1.243573                | -2.339230 | -0.165988 |

***Imino (H toward C1) N7H N3H Z1 (Z1-4) B3LYP/6-31+G(d)***

SCF Done: E(RB+HF-LYP) = -451.265854166 A.U.

Zero-point correction= 0.123872  
(Hartree/Particle)  
Thermal correction to Energy= 0.131133  
Thermal correction to Enthalpy= 0.132077  
Thermal correction to Gibbs Free Energy= 0.092147  
Sum of electronic and zero-point Energies= -451.141983  
Sum of electronic and thermal Energies= -451.134721  
Sum of electronic and thermal Enthalpies= -451.133777  
Sum of electronic and thermal Free Energies= -451.173707

|       | E (Thermal) |  | CV             | S              |  |
|-------|-------------|--|----------------|----------------|--|
|       | KCal/Mol    |  | Cal/Mol-Kelvin | Cal/Mol-Kelvin |  |
| Total | 82.287      |  | 29.361         | 84.040         |  |

---

| Center Number | Atomic Number | Atomic Type | Coordinates (Angstroms) |           |           |
|---------------|---------------|-------------|-------------------------|-----------|-----------|
|               |               |             | X                       | Y         | Z         |
| 1             | 6             | 0           | 0.213174                | 0.507754  | -0.000068 |
| 2             | 6             | 0           | 0.670088                | -0.797478 | -0.000017 |
| 3             | 6             | 0           | -1.560143               | -1.556999 | -0.000001 |
| 4             | 6             | 0           | -2.041334               | -0.278273 | 0.000054  |
| 5             | 6             | 0           | -1.174882               | 0.905947  | -0.000035 |
| 6             | 6             | 0           | 2.417389                | 0.399831  | 0.000033  |
| 7             | 7             | 0           | -0.217275               | -1.849763 | -0.000084 |
| 8             | 7             | 0           | 1.364767                | 1.266139  | -0.000026 |
| 9             | 7             | 0           | 2.033632                | -0.870035 | 0.000056  |
| 10            | 7             | 0           | -1.501232               | 2.164663  | -0.000012 |

|    |   |   |           |           |          |
|----|---|---|-----------|-----------|----------|
| 11 | 1 | 0 | 3.445874  | 0.733815  | 0.000063 |
| 12 | 1 | 0 | -3.117808 | -0.133673 | 0.000203 |
| 13 | 1 | 0 | -2.221981 | -2.416446 | 0.000148 |
| 14 | 1 | 0 | -2.518304 | 2.277539  | 0.000069 |
| 15 | 1 | 0 | 1.383589  | 2.277804  | 0.000137 |
| 16 | 1 | 0 | 0.123640  | -2.800762 | 0.000051 |

***Imino (H toward N7) N7H N3H Z1 (Z1-5) B3LYP/6-31+G(d)***

SCF Done: E(RB+HF-LYP) = -451.259557676 A.U.

Zero-point correction= 0.123342  
(Hartree/Particle)  
Thermal correction to Energy= 0.130727  
Thermal correction to Enthalpy= 0.131672  
Thermal correction to Gibbs Free Energy= 0.091483  
Sum of electronic and zero-point Energies= -451.136216  
Sum of electronic and thermal Energies= -451.128830  
Sum of electronic and thermal Enthalpies= -451.127886  
Sum of electronic and thermal Free Energies= -451.168075

|       | E (Thermal) | CV             | S              |
|-------|-------------|----------------|----------------|
|       | KCal/Mol    | Cal/Mol-Kelvin | Cal/Mol-Kelvin |
| Total | 82.033      | 29.747         | 84.584         |

| Center<br>Number | Atomic<br>Number | Atomic<br>Type | Coordinates (Angstroms) |           |           |
|------------------|------------------|----------------|-------------------------|-----------|-----------|
|                  |                  |                | X                       | Y         | Z         |
| 1                | 6                | 0              | 0.214781                | 0.516170  | -0.000313 |
| 2                | 6                | 0              | 0.653501                | -0.799353 | -0.000078 |
| 3                | 6                | 0              | -1.582004               | -1.542025 | -0.000032 |
| 4                | 6                | 0              | -2.047656               | -0.262199 | -0.000067 |
| 5                | 6                | 0              | -1.180519               | 0.917808  | -0.000115 |
| 6                | 6                | 0              | 2.426615                | 0.359675  | 0.000049  |
| 7                | 7                | 0              | -0.236832               | -1.843259 | -0.000028 |
| 8                | 7                | 0              | 1.392539                | 1.250078  | -0.000293 |
| 9                | 7                | 0              | 2.016237                | -0.897967 | 0.000294  |
| 10               | 7                | 0              | -1.689090               | 2.115729  | 0.000355  |
| 11               | 1                | 0              | 3.461309                | 0.674532  | 0.000252  |
| 12               | 1                | 0              | -3.117733               | -0.085993 | -0.000155 |
| 13               | 1                | 0              | -2.248948               | -2.396973 | 0.000021  |
| 14               | 1                | 0              | 1.473606                | 2.257473  | -0.000059 |
| 15               | 1                | 0              | 0.101328                | -2.795050 | 0.000576  |
| 16               | 1                | 0              | -0.957854               | 2.833486  | 0.000399  |

***Imino (H toward N7) N9H N3H Z1 (Z1-6) B3LYP/6-31+G(d)***

SCF Done: E(RB+HF-LYP) = -451.247981427 A.U.

Zero-point correction= 0.122721  
(Hartree/Particle)  
Thermal correction to Energy= 0.130435  
Thermal correction to Enthalpy= 0.131379  
Thermal correction to Gibbs Free Energy= 0.090504

Sum of electronic and zero-point Energies= -451.125260  
 Sum of electronic and thermal Energies= -451.117547  
 Sum of electronic and thermal Enthalpies= -451.116602  
 Sum of electronic and thermal Free Energies= -451.157478

|       | E (Thermal)<br>KCal/Mol | CV<br>Cal/Mol-Kelvin | S<br>Cal/Mol-Kelvin |
|-------|-------------------------|----------------------|---------------------|
| Total | 81.849                  | 30.323               | 86.030              |

| Center<br>Number | Atomic<br>Number | Atomic<br>Type | Coordinates (Angstroms) |           |           |
|------------------|------------------|----------------|-------------------------|-----------|-----------|
|                  |                  |                | X                       | Y         | Z         |
| 1                | 6                | 0              | 0.219564                | 0.557015  | 0.002603  |
| 2                | 6                | 0              | 0.636908                | -0.761512 | 0.001881  |
| 3                | 6                | 0              | -1.573973               | -1.555729 | 0.003185  |
| 4                | 6                | 0              | -2.054252               | -0.288369 | 0.002073  |
| 5                | 6                | 0              | -1.199674               | 0.908375  | 0.000527  |
| 6                | 6                | 0              | 2.365060                | 0.606260  | 0.001545  |
| 7                | 7                | 0              | -0.209613               | -1.841881 | -0.032362 |
| 8                | 7                | 0              | 1.322020                | 1.394117  | 0.002776  |
| 9                | 7                | 0              | 2.009780                | -0.736282 | -0.000809 |
| 10               | 7                | 0              | -1.721575               | 2.091448  | -0.001281 |
| 11               | 1                | 0              | 3.401664                | 0.915114  | 0.006884  |
| 12               | 1                | 0              | -3.127305               | -0.128781 | 0.003883  |
| 13               | 1                | 0              | -2.219508               | -2.426855 | 0.010273  |
| 14               | 1                | 0              | 0.113740                | -2.780453 | 0.150611  |
| 15               | 1                | 0              | -0.977887               | 2.796528  | 0.000273  |
| 16               | 1                | 0              | 2.643214                | -1.523604 | -0.021069 |

***Imino (H toward C1) N9H N3H Z1 (Z1-7) B3LYP/6-31+G(d)***

SCF Done: E(RB+HF-LYP) = -451.241719280 A.U.

Zero-point correction= 0.122351  
 (Hartree/Particle)  
 Thermal correction to Energy= 0.130161  
 Thermal correction to Enthalpy= 0.131105  
 Thermal correction to Gibbs Free Energy= 0.089942  
 Sum of electronic and zero-point Energies= -451.119369  
 Sum of electronic and thermal Energies= -451.111558  
 Sum of electronic and thermal Enthalpies= -451.110614  
 Sum of electronic and thermal Free Energies= -451.151777

|       | E (Thermal)<br>KCal/Mol | CV<br>Cal/Mol-Kelvin | S<br>Cal/Mol-Kelvin |
|-------|-------------------------|----------------------|---------------------|
| Total | 81.677                  | 30.479               | 86.634              |

| Center<br>Number | Atomic<br>Number | Atomic<br>Type | Coordinates (Angstroms) |           |          |
|------------------|------------------|----------------|-------------------------|-----------|----------|
|                  |                  |                | X                       | Y         | Z        |
| 1                | 6                | 0              | -0.215669               | -0.579767 | 0.002206 |
| 2                | 6                | 0              | -0.667219               | 0.729730  | 0.000851 |
| 3                | 6                | 0              | 1.510592                | 1.603352  | 0.003301 |
| 4                | 6                | 0              | 2.028753                | 0.349512  | 0.001752 |
| 5                | 6                | 0              | 1.215017                | -0.883142 | 0.000341 |

|    |   |   |           |           |           |
|----|---|---|-----------|-----------|-----------|
| 6  | 6 | 0 | -2.359981 | -0.675372 | 0.001533  |
| 7  | 7 | 0 | 0.143937  | 1.839574  | -0.026214 |
| 8  | 7 | 0 | -1.301360 | -1.439149 | 0.003196  |
| 9  | 7 | 0 | -2.038043 | 0.676370  | -0.000919 |
| 10 | 7 | 0 | 1.665758  | -2.095267 | -0.001429 |
| 11 | 1 | 0 | -3.389247 | -1.008439 | 0.006212  |
| 12 | 1 | 0 | 3.110207  | 0.243883  | 0.003516  |
| 13 | 1 | 0 | 2.130042  | 2.493611  | 0.010898  |
| 14 | 1 | 0 | -0.215278 | 2.771387  | 0.119444  |
| 15 | 1 | 0 | -2.687453 | 1.450353  | -0.019753 |
| 16 | 1 | 0 | 2.690730  | -2.087374 | -0.002658 |

***N10-deprotonated (N10H toward N7) amino N9H Z1 (Z1-8) B3LYP/6-31+G(d)***

SCF Done: E(RB+HF-LYP) = -450.712342526 A.U.

Zero-point correction= 0.109547  
(Hartree/Particle)  
Thermal correction to Energy= 0.116600  
Thermal correction to Enthalpy= 0.117544  
Thermal correction to Gibbs Free Energy= 0.077989  
Sum of electronic and zero-point Energies= -450.602795  
Sum of electronic and thermal Energies= -450.595743  
Sum of electronic and thermal Enthalpies= -450.594799  
Sum of electronic and thermal Free Energies= -450.634354

|       | E (Thermal)<br>KCal/Mol | CV<br>Cal/Mol-Kelvin | S<br>Cal/Mol-Kelvin |
|-------|-------------------------|----------------------|---------------------|
| Total | 73.167                  | 28.355               | 83.250              |

| Center<br>Number | Atomic<br>Number | Atomic<br>Type | Coordinates (Angstroms) |           |           |
|------------------|------------------|----------------|-------------------------|-----------|-----------|
|                  |                  |                | X                       | Y         | Z         |
| 1                | 6                | 0              | 0.180524                | 0.538473  | 0.000032  |
| 2                | 6                | 0              | 0.618931                | -0.796269 | -0.000014 |
| 3                | 6                | 0              | -1.429833               | -1.651204 | 0.000044  |
| 4                | 6                | 0              | -2.012619               | -0.393449 | -0.000008 |
| 5                | 6                | 0              | -1.241359               | 0.838425  | -0.000053 |
| 6                | 6                | 0              | 2.329184                | 0.636687  | 0.000191  |
| 7                | 7                | 0              | -0.096038               | -1.932906 | 0.000118  |
| 8                | 7                | 0              | 1.266594                | 1.408121  | 0.000084  |
| 9                | 7                | 0              | 2.006338                | -0.706924 | -0.000516 |
| 10               | 7                | 0              | -1.808228               | 2.028764  | 0.000042  |
| 11               | 1                | 0              | -1.066719               | 2.736505  | -0.000547 |
| 12               | 1                | 0              | 2.636625                | -1.495601 | 0.001155  |
| 13               | 1                | 0              | 3.357763                | 0.978082  | 0.000205  |
| 14               | 1                | 0              | -3.097445               | -0.305220 | 0.000117  |
| 15               | 1                | 0              | -2.079860               | -2.529129 | -0.000182 |

***N10-deprotonated (N10H toward C1) amino N9H Z1 (Z1-9) B3LYP/6-31+G(d)***

SCF Done: E(RB+HF-LYP) = -450.706788616 A.U.

Zero-point correction= 0.109202

(Hartree/Particle)

Thermal correction to Energy= 0.116271  
Thermal correction to Enthalpy= 0.117216  
Thermal correction to Gibbs Free Energy= 0.077615  
Sum of electronic and zero-point Energies= -450.597587  
Sum of electronic and thermal Energies= -450.590517  
Sum of electronic and thermal Enthalpies= -450.589573  
Sum of electronic and thermal Free Energies= -450.629174

|       | E (Thermal)<br>KCal/Mol | CV<br>Cal/Mol-Kelvin | S<br>Cal/Mol-Kelvin |
|-------|-------------------------|----------------------|---------------------|
| Total | 72.961                  | 28.422               | 83.348              |

| Center<br>Number | Atomic<br>Number | Atomic<br>Type | Coordinates (Angstroms) |           |           |
|------------------|------------------|----------------|-------------------------|-----------|-----------|
|                  |                  |                | X                       | Y         | Z         |
| 1                | 6                | 0              | 0.181231                | -0.562957 | -0.000005 |
| 2                | 6                | 0              | 0.652024                | 0.763113  | 0.000029  |
| 3                | 6                | 0              | -1.363516               | 1.691137  | 0.000040  |
| 4                | 6                | 0              | -1.980388               | 0.448725  | 0.000007  |
| 5                | 6                | 0              | -1.250155               | -0.815185 | -0.000010 |
| 6                | 6                | 0              | 2.327601                | -0.703845 | -0.000014 |
| 7                | 7                | 0              | -0.026197               | 1.925788  | 0.000059  |
| 8                | 7                | 0              | 1.251704                | -1.452827 | -0.000070 |
| 9                | 7                | 0              | 2.035063                | 0.646955  | 0.000023  |
| 10               | 7                | 0              | -1.771253               | -2.026389 | -0.000058 |
| 11               | 1                | 0              | 2.678540                | 1.424572  | 0.000091  |
| 12               | 1                | 0              | 3.348992                | -1.067051 | -0.000046 |
| 13               | 1                | 0              | -3.070701               | 0.404995  | 0.000015  |
| 14               | 1                | 0              | -1.988022               | 2.588004  | 0.000045  |
| 15               | 1                | 0              | -2.794816               | -1.931141 | -0.000071 |

### ***N9-deprotonated amino N9H Z1 (Z1-10) B3LYP/6-31+G(d)***

SCF Done: E(RB+HF-LYP) = -450.736318593 A.U.

Zero-point correction= 0.110358  
(Hartree/Particle)  
Thermal correction to Energy= 0.117348  
Thermal correction to Enthalpy= 0.118293  
Thermal correction to Gibbs Free Energy= 0.078897  
Sum of electronic and zero-point Energies= -450.625961  
Sum of electronic and thermal Energies= -450.618970  
Sum of electronic and thermal Enthalpies= -450.618026  
Sum of electronic and thermal Free Energies= -450.657422

|       | E (Thermal)<br>KCal/Mol | CV<br>Cal/Mol-Kelvin | S<br>Cal/Mol-Kelvin |
|-------|-------------------------|----------------------|---------------------|
| Total | 73.637                  | 28.036               | 82.915              |

| Center<br>Number | Atomic<br>Number | Atomic<br>Type | Coordinates (Angstroms) |           |           |
|------------------|------------------|----------------|-------------------------|-----------|-----------|
|                  |                  |                | X                       | Y         | Z         |
| 1                | 6                | 0              | 0.212535                | -0.504428 | -0.021042 |

|    |   |   |           |           |           |
|----|---|---|-----------|-----------|-----------|
| 2  | 6 | 0 | 0.781028  | 0.811622  | -0.006385 |
| 3  | 6 | 0 | -1.265355 | 1.774130  | 0.007599  |
| 4  | 6 | 0 | -1.927907 | 0.526816  | -0.005584 |
| 5  | 6 | 0 | -1.178656 | -0.658618 | -0.019152 |
| 6  | 6 | 0 | 2.314324  | -0.652192 | 0.010828  |
| 7  | 1 | 0 | -1.871525 | 2.683152  | 0.018643  |
| 8  | 1 | 0 | -3.017354 | 0.495375  | -0.018189 |
| 9  | 1 | 0 | 3.311837  | -1.087410 | 0.024171  |
| 10 | 7 | 0 | 0.058146  | 1.957227  | 0.006322  |
| 11 | 7 | 0 | 1.217366  | -1.441859 | -0.006414 |
| 12 | 7 | 0 | 2.145039  | 0.688187  | 0.011672  |
| 13 | 7 | 0 | -1.757481 | -1.943437 | -0.077826 |
| 14 | 1 | 0 | -1.077090 | -2.658322 | 0.166034  |
| 15 | 1 | 0 | -2.603174 | -2.037594 | 0.475482  |

**C8-deprotonated amino N9H Z1 (Z1-11) B3LYP/6-31+G(d)**

SCF Done: E(RB+HF-LYP) = -450.676544116 A.U.  
 Zero-point correction= 0.109474  
 (Hartree/Particle)  
 Thermal correction to Energy= 0.116741  
 Thermal correction to Enthalpy= 0.117685  
 Thermal correction to Gibbs Free Energy= 0.077858  
 Sum of electronic and zero-point Energies= -450.567071  
 Sum of electronic and thermal Energies= -450.559803  
 Sum of electronic and thermal Enthalpies= -450.558859  
 Sum of electronic and thermal Free Energies= -450.598686

|       | E (Thermal)<br>KCal/Mol | CV<br>Cal/Mol-Kelvin | S<br>Cal/Mol-Kelvin |
|-------|-------------------------|----------------------|---------------------|
| Total | 73.256                  | 29.297               | 83.824              |

| Center<br>Number | Atomic<br>Number | Atomic<br>Type | Coordinates (Angstroms) |           |           |
|------------------|------------------|----------------|-------------------------|-----------|-----------|
|                  |                  |                | X                       | Y         | Z         |
| 1                | 6                | 0              | 0.199236                | -0.532087 | -0.021883 |
| 2                | 6                | 0              | 0.780902                | 0.759680  | -0.010671 |
| 3                | 6                | 0              | -1.199131               | 1.820440  | 0.009031  |
| 4                | 6                | 0              | -1.900751               | 0.603522  | -0.003317 |
| 5                | 6                | 0              | -1.197326               | -0.616619 | -0.018348 |
| 6                | 6                | 0              | 2.387602                | -0.912720 | 0.017615  |
| 7                | 1                | 0              | -1.758675               | 2.756830  | 0.021500  |
| 8                | 1                | 0              | -2.990376               | 0.612461  | -0.013547 |
| 9                | 7                | 0              | 0.142399                | 1.939409  | 0.003757  |
| 10               | 7                | 0              | 1.167725                | -1.516114 | -0.003119 |
| 11               | 7                | 0              | 2.127391                | 0.489632  | 0.007393  |
| 12               | 7                | 0              | -1.823861               | -1.874003 | -0.078181 |
| 13               | 1                | 0              | -1.159690               | -2.615001 | 0.133836  |
| 14               | 1                | 0              | -2.663188               | -1.950792 | 0.486436  |
| 15               | 1                | 0              | 2.853160                | 1.190743  | 0.028259  |

**C1-deprotonated amino N9H Z1 (Z1-12) B3LYP/6-31+G(d)**

SCF Done: E(RB+HF-LYP) = -450.656404107 A.U.

Zero-point correction= 0.109386  
(Hartree/Particle)  
Thermal correction to Energy= 0.116750  
Thermal correction to Enthalpy= 0.117694  
Thermal correction to Gibbs Free Energy= 0.077621  
Sum of electronic and zero-point Energies= -450.547018  
Sum of electronic and thermal Energies= -450.539654  
Sum of electronic and thermal Enthalpies= -450.538710  
Sum of electronic and thermal Free Energies= -450.578784

|       | E (Thermal)<br>KCal/Mol | CV<br>Cal/Mol-Kelvin | S<br>Cal/Mol-Kelvin |
|-------|-------------------------|----------------------|---------------------|
| Total | 73.262                  | 29.427               | 84.343              |

| Center<br>Number | Atomic<br>Number | Atomic<br>Type | Coordinates (Angstroms) |           |           |
|------------------|------------------|----------------|-------------------------|-----------|-----------|
|                  |                  |                | X                       | Y         | Z         |
| 1                | 6                | 0              | 0.122228                | -0.509412 | -0.019125 |
| 2                | 6                | 0              | 0.696761                | 0.777992  | -0.007332 |
| 3                | 6                | 0              | -1.295359               | 1.786752  | 0.008994  |
| 4                | 6                | 0              | -2.056659               | 0.600077  | 0.005416  |
| 5                | 6                | 0              | -1.288401               | -0.583104 | -0.018293 |
| 6                | 6                | 0              | 2.251875                | -0.820020 | 0.007883  |
| 7                | 1                | 0              | -1.815095               | 2.749685  | 0.026654  |
| 8                | 7                | 0              | 0.069487                | 1.946561  | 0.003028  |
| 9                | 7                | 0              | 1.124249                | -1.492148 | -0.005673 |
| 10               | 7                | 0              | 2.073816                | 0.546684  | 0.004714  |
| 11               | 7                | 0              | -1.914293               | -1.842334 | -0.077200 |
| 12               | 1                | 0              | -1.392246               | -2.600058 | 0.352882  |
| 13               | 1                | 0              | -2.876394               | -1.774584 | 0.243522  |
| 14               | 1                | 0              | 2.785986                | 1.261646  | 0.017548  |
| 15               | 1                | 0              | 3.242255                | -1.261740 | 0.020045  |

**C2-deprotonated amino N9H Z1 (Z1-13) B3LYP/6-31+G(d)**

SCF Done: E(RB+HF-LYP) = -450.638928031 A.U.

Zero-point correction= 0.108560  
(Hartree/Particle)  
Thermal correction to Energy= 0.116039  
Thermal correction to Enthalpy= 0.116983  
Thermal correction to Gibbs Free Energy= 0.076747  
Sum of electronic and zero-point Energies= -450.530368  
Sum of electronic and thermal Energies= -450.522889  
Sum of electronic and thermal Enthalpies= -450.521945  
Sum of electronic and thermal Free Energies= -450.562181

|       | E (Thermal)<br>KCal/Mol | CV<br>Cal/Mol-Kelvin | S<br>Cal/Mol-Kelvin |
|-------|-------------------------|----------------------|---------------------|
| Total | 72.816                  | 29.878               | 84.685              |

| Center<br>Number | Atomic<br>Number | Atomic<br>Type | Coordinates (Angstroms) |   |   |
|------------------|------------------|----------------|-------------------------|---|---|
|                  |                  |                | X                       | Y | Z |

|    |   |   |           |           |           |
|----|---|---|-----------|-----------|-----------|
| 1  | 6 | 0 | 0.125151  | -0.502669 | -0.019254 |
| 2  | 6 | 0 | 0.716232  | 0.775775  | -0.006922 |
| 3  | 6 | 0 | -1.249608 | 1.997085  | 0.011821  |
| 4  | 6 | 0 | -1.907828 | 0.709632  | -0.000209 |
| 5  | 6 | 0 | -1.281441 | -0.540178 | -0.018881 |
| 6  | 6 | 0 | 2.234949  | -0.869667 | 0.008747  |
| 7  | 7 | 0 | 0.138806  | 1.975119  | 0.004235  |
| 8  | 7 | 0 | 1.087069  | -1.513138 | -0.005363 |
| 9  | 7 | 0 | 2.086969  | 0.499101  | 0.006797  |
| 10 | 7 | 0 | -1.964491 | -1.775760 | -0.081349 |
| 11 | 1 | 0 | -1.408725 | -2.549489 | 0.271954  |
| 12 | 1 | 0 | -2.875923 | -1.745614 | 0.363660  |
| 13 | 1 | 0 | 2.812577  | 1.201564  | 0.018983  |
| 14 | 1 | 0 | 3.211421  | -1.340537 | 0.021311  |
| 15 | 1 | 0 | -3.002549 | 0.716957  | 0.002047  |

**N7-protonated amino N9H Z1 (Z1-14) B3LYP/6-31+G(d)**

SCF Done: E(RB+HF-LYP) = -451.654634307 A.U.

Zero-point correction= 0.136881  
(Hartree/Particle)  
Thermal correction to Energy= 0.144528  
Thermal correction to Enthalpy= 0.145472  
Thermal correction to Gibbs Free Energy= 0.104933  
Sum of electronic and zero-point Energies= -451.517754  
Sum of electronic and thermal Energies= -451.510106  
Sum of electronic and thermal Enthalpies= -451.509162  
Sum of electronic and thermal Free Energies= -451.549701

|       | E (Thermal)<br>KCal/Mol | CV<br>Cal/Mol-Kelvin | S<br>Cal/Mol-Kelvin |
|-------|-------------------------|----------------------|---------------------|
| Total | 90.693                  | 31.072               | 85.321              |

| Center<br>Number | Atomic<br>Number | Atomic<br>Type | Coordinates (Angstroms) |           |           |
|------------------|------------------|----------------|-------------------------|-----------|-----------|
|                  |                  |                | X                       | Y         | Z         |
| 1                | 6                | 0              | 0.133844                | -0.494925 | 0.003564  |
| 2                | 6                | 0              | 0.682271                | 0.796984  | 0.011197  |
| 3                | 6                | 0              | -1.291014               | 1.802382  | -0.006512 |
| 4                | 6                | 0              | -1.963322               | 0.572971  | -0.009224 |
| 5                | 6                | 0              | -1.270389               | -0.653602 | 0.003660  |
| 6                | 6                | 0              | 2.359747                | -0.677706 | -0.008535 |
| 7                | 7                | 0              | 0.044260                | 1.951835  | 0.009010  |
| 8                | 7                | 0              | 1.218971                | -1.377324 | -0.010756 |
| 9                | 7                | 0              | 2.070940                | 0.624302  | 0.009116  |
| 10               | 7                | 0              | -1.897054               | -1.864283 | -0.035329 |
| 11               | 1                | 0              | 2.745943                | 1.383719  | 0.013729  |
| 12               | 1                | 0              | 3.352578                | -1.104437 | -0.022611 |
| 13               | 1                | 0              | -3.049192               | 0.569321  | -0.016415 |
| 14               | 1                | 0              | -1.868806               | 2.722139  | -0.010831 |
| 15               | 1                | 0              | -2.904722               | -1.889448 | 0.056399  |
| 16               | 1                | 0              | -1.431901               | -2.709983 | 0.263280  |
| 17               | 1                | 0              | 1.189460                | -2.389651 | -0.052744 |



### **N3-protonated amino N9H Z1 (Z1-15) B3LYP/6-31+G(d)**

SCF Done: E(RB+HF-LYP) = -451.668329052 A.U.

Zero-point correction= 0.137522  
(Hartree/Particle)  
Thermal correction to Energy= 0.144951  
Thermal correction to Enthalpy= 0.145895  
Thermal correction to Gibbs Free Energy= 0.105822  
Sum of electronic and zero-point Energies= -451.530807  
Sum of electronic and thermal Energies= -451.523378  
Sum of electronic and thermal Enthalpies= -451.522434  
Sum of electronic and thermal Free Energies= -451.562507

|       | E (Thermal)<br>KCal/Mol | CV<br>Cal/Mol-Kelvin | S<br>Cal/Mol-Kelvin |
|-------|-------------------------|----------------------|---------------------|
| Total | 90.958                  | 30.737               | 84.342              |

| Center<br>Number | Atomic<br>Number | Atomic<br>Type | Coordinates (Angstroms) |           |           |
|------------------|------------------|----------------|-------------------------|-----------|-----------|
|                  |                  |                | X                       | Y         | Z         |
| 1                | 6                | 0              | -0.197966               | -0.530344 | -0.000037 |
| 2                | 6                | 0              | -0.728584               | 0.760145  | 0.000066  |
| 3                | 6                | 0              | 1.409245                | 1.706821  | 0.000108  |
| 4                | 6                | 0              | 1.993143                | 0.464554  | 0.000008  |
| 5                | 6                | 0              | 1.205371                | -0.728037 | -0.000070 |
| 6                | 6                | 0              | -2.315991               | -0.764051 | -0.000027 |
| 7                | 7                | 0              | 0.050491                | 1.874412  | 0.000139  |
| 8                | 7                | 0              | -1.213283               | -1.463335 | -0.000093 |
| 9                | 7                | 0              | -2.084156               | 0.607701  | 0.000073  |
| 10               | 7                | 0              | 1.726522                | -1.957066 | -0.000167 |
| 11               | 1                | 0              | -2.794631               | 1.330229  | 0.000135  |
| 12               | 1                | 0              | -3.321985               | -1.162431 | -0.000043 |
| 13               | 1                | 0              | 3.076060                | 0.403493  | -0.000011 |
| 14               | 1                | 0              | 1.994035                | 2.618711  | 0.000168  |
| 15               | 1                | 0              | 2.724938                | -2.119240 | -0.000193 |
| 16               | 1                | 0              | 1.116105                | -2.766577 | -0.000220 |
| 17               | 1                | 0              | -0.342848               | 2.809308  | 0.000214  |

### **N3-protonated amino N9H Z1 (Z1-15) B3LYP/6-31+G(d), cpcm, water, RADII=UAKS**

Total free energy in solution:  
with all non electrostatic terms (a.u.) = -451.772659

(Polarized solute)-Solvent (kcal/mol) = -70.23

Cavitation energy (kcal/mol) = 16.90  
Dispersion energy (kcal/mol) = -21.49  
Repulsion energy (kcal/mol) = 5.24  
Total non electrostatic (kcal/mol) = 0.65

### ***N9-protonated amino N9H Z1 (Z1-16) B3LYP/6-31+G(d)***

SCF Done: E(RB+HF-LYP) = -451.599657906 A.U.

Zero-point correction= 0.136095  
(Hartree/Particle)  
Thermal correction to Energy= 0.143696  
Thermal correction to Enthalpy= 0.144641  
Thermal correction to Gibbs Free Energy= 0.104184  
Sum of electronic and zero-point Energies= -451.463563  
Sum of electronic and thermal Energies= -451.455962  
Sum of electronic and thermal Enthalpies= -451.455017  
Sum of electronic and thermal Free Energies= -451.495474

|       | E (Thermal)<br>KCal/Mol | CV<br>Cal/Mol-Kelvin | S<br>Cal/Mol-Kelvin |
|-------|-------------------------|----------------------|---------------------|
| Total | 90.171                  | 30.983               | 85.149              |

| Center<br>Number | Atomic<br>Number | Atomic<br>Type | Coordinates (Angstroms) |           |           |
|------------------|------------------|----------------|-------------------------|-----------|-----------|
|                  |                  |                | X                       | Y         | Z         |
| 1                | 6                | 0              | -0.126100               | -0.513692 | -0.000172 |
| 2                | 6                | 0              | -0.643467               | 0.775121  | -0.000176 |
| 3                | 6                | 0              | 1.311947                | 1.793729  | 0.000062  |
| 4                | 6                | 0              | 1.981890                | 0.579312  | 0.000083  |
| 5                | 6                | 0              | 1.279021                | -0.660933 | -0.000118 |
| 6                | 6                | 0              | -2.265826               | -0.914215 | 0.000151  |
| 7                | 7                | 0              | -0.047406               | 1.927897  | -0.000139 |
| 8                | 7                | 0              | -1.135830               | -1.489906 | -0.000114 |
| 9                | 7                | 0              | -2.132819               | 0.605327  | 0.000128  |
| 10               | 7                | 0              | 1.885645                | -1.861199 | 0.000074  |
| 11               | 1                | 0              | -2.568488               | 1.038286  | -0.827741 |
| 12               | 1                | 0              | -3.258096               | -1.347703 | 0.000234  |
| 13               | 1                | 0              | 3.067799                | 0.577712  | 0.000172  |
| 14               | 1                | 0              | 1.871679                | 2.723521  | 0.000481  |
| 15               | 1                | 0              | 2.893227                | -1.941758 | 0.000006  |
| 16               | 1                | 0              | 1.350250                | -2.719363 | 0.000268  |
| 17               | 1                | 0              | -2.568283               | 1.038543  | 0.827962  |

### ***N10-protonated amino N9H Z1 (Z1-17) B3LYP/6-31+G(d)***

SCF Done: E(RB+HF-LYP) = -451.631395754 A.U.

Zero-point correction= 0.138288  
(Hartree/Particle)  
Thermal correction to Energy= 0.145799  
Thermal correction to Enthalpy= 0.146743  
Thermal correction to Gibbs Free Energy= 0.106157  
Sum of electronic and zero-point Energies= -451.493108  
Sum of electronic and thermal Energies= -451.485597  
Sum of electronic and thermal Enthalpies= -451.484652  
Sum of electronic and thermal Free Energies= -451.525238

|  | E (Thermal)<br>KCal/Mol | CV<br>Cal/Mol-Kelvin | S<br>Cal/Mol-Kelvin |
|--|-------------------------|----------------------|---------------------|
|--|-------------------------|----------------------|---------------------|

Total 91.490 29.529 85.421

| Center Number | Atomic Number | Atomic Type | Coordinates (Angstroms) |           |           |
|---------------|---------------|-------------|-------------------------|-----------|-----------|
|               |               |             | X                       | Y         | Z         |
| 1             | 6             | 0           | -0.167737               | -0.483784 | -0.000004 |
| 2             | 6             | 0           | -0.798420               | 0.782399  | -0.000043 |
| 3             | 6             | 0           | 1.139857                | 1.913556  | 0.000035  |
| 4             | 6             | 0           | 1.903214                | 0.721872  | 0.000080  |
| 5             | 6             | 0           | 1.217588                | -0.483497 | 0.000059  |
| 6             | 6             | 0           | -2.246125               | -0.894111 | -0.000095 |
| 7             | 7             | 0           | -0.198786               | 1.963580  | -0.000026 |
| 8             | 7             | 0           | -1.078301               | -1.510943 | -0.000036 |
| 9             | 7             | 0           | -2.144240               | 0.473918  | -0.000102 |
| 10            | 7             | 0           | 1.870956                | -1.819432 | 0.000101  |
| 11            | 1             | 0           | -2.909123               | 1.139546  | -0.000142 |
| 12            | 1             | 0           | -3.206026               | -1.394253 | -0.000134 |
| 13            | 1             | 0           | 2.987786                | 0.779368  | 0.000129  |
| 14            | 1             | 0           | 1.653499                | 2.870352  | 0.000051  |
| 15            | 1             | 0           | 2.456709                | -1.974369 | 0.831434  |
| 16            | 1             | 0           | 2.456793                | -1.974381 | -0.831170 |
| 17            | 1             | 0           | 1.122691                | -2.534740 | 0.000069  |

**N10-deprotonated (N10H toward N7) amino N3H Z1 (Z1-18) B3LYP/6-31+G(d)**

SCF Done: E(RB3LYP) = -450.716729976

Zero-point correction= 0.109821  
(Hartree/Particle)

Thermal correction to Energy= 0.117075

Thermal correction to Enthalpy= 0.118019

Thermal correction to Gibbs Free Energy= 0.077937

Sum of electronic and zero-point Energies= -450.606909

Sum of electronic and thermal Energies= -450.599655

Sum of electronic and thermal Enthalpies= -450.598711

Sum of electronic and thermal Free Energies= -450.638793

| Total | E (Thermal) | CV             | S              |
|-------|-------------|----------------|----------------|
|       | KCal/Mol    | Cal/Mol-Kelvin | Cal/Mol-Kelvin |
|       | 73.466      | 28.480         | 84.360         |

| Center Number | Atomic Number | Atomic Type | Coordinates (Angstroms) |           |           |
|---------------|---------------|-------------|-------------------------|-----------|-----------|
|               |               |             | X                       | Y         | Z         |
| 1             | 6             | 0           | 0.253266                | 0.562784  | -0.000094 |
| 2             | 6             | 0           | 0.701223                | -0.767333 | 0.000122  |
| 3             | 6             | 0           | -1.528750               | -1.561609 | 0.000269  |
| 4             | 6             | 0           | -1.155355               | 0.908290  | -0.000141 |
| 5             | 6             | 0           | 2.377906                | 0.490601  | -0.000100 |
| 6             | 1             | 0           | -2.184127               | -2.428678 | 0.000416  |
| 7             | 1             | 0           | 3.417827                | 0.806366  | -0.000161 |
| 8             | 7             | 0           | 1.368692                | 1.373875  | -0.000238 |
| 9             | 7             | 0           | 2.050071                | -0.836752 | 0.000123  |
| 10            | 7             | 0           | -1.693427               | 2.104303  | -0.000334 |
| 11            | 1             | 0           | -0.932002               | 2.790699  | -0.000452 |

|    |   |   |           |           |          |
|----|---|---|-----------|-----------|----------|
| 12 | 7 | 0 | -0.182662 | -1.835551 | 0.000305 |
| 13 | 6 | 0 | -2.012525 | -0.283433 | 0.000061 |
| 14 | 1 | 0 | -3.087540 | -0.125024 | 0.000042 |
| 15 | 1 | 0 | 0.172533  | -2.780290 | 0.000457 |

-----

**N10-deprotonated (N10H toward C1) amino N3H Z1 (Z1-19) B3LYP/6-31+G(d)**

SCF Done: E(RB3LYP) = -450.706896413

Zero-point correction= 0.109295  
(Hartree/Particle)  
Thermal correction to Energy= 0.116554  
Thermal correction to Enthalpy= 0.117498  
Thermal correction to Gibbs Free Energy= 0.077420  
Sum of electronic and zero-point Energies= -450.597601  
Sum of electronic and thermal Energies= -450.590342  
Sum of electronic and thermal Enthalpies= -450.589398  
Sum of electronic and thermal Free Energies= -450.629477

|       | E (Thermal) | CV             | S              |
|-------|-------------|----------------|----------------|
|       | KCal/Mol    | Cal/Mol-Kelvin | Cal/Mol-Kelvin |
| Total | 73.139      | 28.647         | 84.353         |

-----

| Center<br>Number | Atomic<br>Number | Atomic<br>Type | Coordinates (Angstroms) |           |           |
|------------------|------------------|----------------|-------------------------|-----------|-----------|
|                  |                  |                | X                       | Y         | Z         |
| 1                | 6                | 0              | -0.247317               | -0.595942 | -0.000080 |
| 2                | 6                | 0              | -0.741621               | 0.723681  | 0.000042  |
| 3                | 6                | 0              | 1.443906                | 1.623492  | 0.000263  |
| 4                | 6                | 0              | 1.176742                | -0.876772 | -0.000033 |
| 5                | 6                | 0              | -2.374650               | -0.584121 | -0.000199 |
| 6                | 1                | 0              | 2.063616                | 2.516706  | 0.000397  |
| 7                | 1                | 0              | -3.404504               | -0.932059 | -0.000297 |
| 8                | 7                | 0              | -1.341455               | -1.435285 | -0.000237 |
| 9                | 7                | 0              | -2.089721               | 0.754070  | -0.000030 |
| 10               | 7                | 0              | 1.692525                | -2.084127 | -0.000140 |
| 11               | 7                | 0              | 0.092072                | 1.832162  | 0.000214  |
| 12               | 6                | 0              | 1.976284                | 0.363534  | 0.000149  |
| 13               | 1                | 0              | 3.061126                | 0.267568  | 0.000197  |
| 14               | 1                | 0              | -0.310961               | 2.757747  | 0.000293  |
| 15               | 1                | 0              | 2.716707                | -2.000930 | -0.000075 |

-----

**C2-deprotonated amino N3H Z1 (Z1-20) B3LYP/6-31+G(d)**

SCF Done: E(RB3LYP) = -450.680328252

Zero-point correction= 0.110632  
(Hartree/Particle)  
Thermal correction to Energy= 0.117721  
Thermal correction to Enthalpy= 0.118666  
Thermal correction to Gibbs Free Energy= 0.079109

Sum of electronic and zero-point Energies= -450.569696  
 Sum of electronic and thermal Energies= -450.562607  
 Sum of electronic and thermal Enthalpies= -450.561663  
 Sum of electronic and thermal Free Energies= -450.601219

|       | E (Thermal)<br>KCal/Mol | CV<br>Cal/Mol-Kelvin | S<br>Cal/Mol-Kelvin |
|-------|-------------------------|----------------------|---------------------|
| Total | 73.871                  | 28.526               | 83.254              |

| Center<br>Number | Atomic<br>Number | Atomic<br>Type | Coordinates (Angstroms) |           |           |
|------------------|------------------|----------------|-------------------------|-----------|-----------|
|                  |                  |                | X                       | Y         | Z         |
| 1                | 6                | 0              | -0.183596               | -0.526935 | -0.022351 |
| 2                | 6                | 0              | -0.801333               | 0.738516  | -0.008571 |
| 3                | 6                | 0              | 1.341594                | 1.914767  | 0.010866  |
| 4                | 6                | 0              | 1.219302                | -0.598942 | -0.018112 |
| 5                | 6                | 0              | -2.285263               | -0.752408 | 0.011510  |
| 6                | 1                | 0              | -3.271531               | -1.209502 | 0.026245  |
| 7                | 7                | 0              | -1.168397               | -1.497412 | -0.006249 |
| 8                | 7                | 0              | -2.149293               | 0.606744  | 0.011593  |
| 9                | 7                | 0              | 1.851401                | -1.846293 | -0.072926 |
| 10               | 1                | 0              | 2.763353                | -1.878861 | 0.367910  |
| 11               | 1                | 0              | 1.248155                | -2.611140 | 0.212382  |
| 12               | 7                | 0              | -0.036445               | 1.879221  | 0.001213  |
| 13               | 6                | 0              | 1.925552                | 0.620944  | 0.001064  |
| 14               | 1                | 0              | -0.535424               | 2.761403  | 0.010553  |
| 15               | 1                | 0              | 3.017063                | 0.566620  | 0.001064  |

**C1-deprotonated amino N3H Z1 (Z1-21) B3LYP/6-31+G(d)**

SCF Done: E(RB3LYP) = -450.668639394

Zero-point correction= 0.109924  
 (Hartree/Particle)  
 Thermal correction to Energy= 0.117157  
 Thermal correction to Enthalpy= 0.118101  
 Thermal correction to Gibbs Free Energy= 0.078231  
 Sum of electronic and zero-point Energies= -450.558716  
 Sum of electronic and thermal Energies= -450.551482  
 Sum of electronic and thermal Enthalpies= -450.550538  
 Sum of electronic and thermal Free Energies= -450.590409

|       | E (Thermal)<br>KCal/Mol | CV<br>Cal/Mol-Kelvin | S<br>Cal/Mol-Kelvin |
|-------|-------------------------|----------------------|---------------------|
| Total | 73.517                  | 29.058               | 83.915              |

| Center<br>Number | Atomic<br>Number | Atomic<br>Type | Coordinates (Angstroms) |           |           |
|------------------|------------------|----------------|-------------------------|-----------|-----------|
|                  |                  |                | X                       | Y         | Z         |
| 1                | 6                | 0              | -0.186965               | -0.533866 | -0.017585 |
| 2                | 6                | 0              | -0.773326               | 0.752690  | -0.008551 |
| 3                | 6                | 0              | 1.410337                | 1.693067  | 0.009930  |

|    |   |   |           |           |           |
|----|---|---|-----------|-----------|-----------|
| 4  | 6 | 0 | 1.216882  | -0.658966 | -0.015594 |
| 5  | 6 | 0 | -2.303772 | -0.682295 | 0.010353  |
| 6  | 1 | 0 | 1.928103  | 2.655069  | 0.027551  |
| 7  | 1 | 0 | -3.306760 | -1.101959 | 0.024252  |
| 8  | 7 | 0 | -1.216780 | -1.464564 | -0.002053 |
| 9  | 7 | 0 | -2.123830 | 0.673763  | 0.006237  |
| 10 | 7 | 0 | 1.776741  | -1.925500 | -0.062931 |
| 11 | 1 | 0 | 2.746060  | -1.953767 | 0.231586  |
| 12 | 1 | 0 | 1.186600  | -2.694800 | 0.232001  |
| 13 | 7 | 0 | 0.023604  | 1.856300  | -0.004464 |
| 14 | 6 | 0 | 2.075375  | 0.485853  | 0.007432  |
| 15 | 1 | 0 | -0.403340 | 2.776560  | 0.011180  |

**C8-deprotonated amino N3H Z1 (Z1-22) B3LYP/6-31+G(d)**

SCF Done: E(RB3LYP) = -450.624790942

Zero-point correction= 0.108155  
(Hartree/Particle)

Thermal correction to Energy= 0.115726  
 Thermal correction to Enthalpy= 0.116670  
 Thermal correction to Gibbs Free Energy= 0.076259  
 Sum of electronic and zero-point Energies= -450.516636  
 Sum of electronic and thermal Energies= -450.509065  
 Sum of electronic and thermal Enthalpies= -450.508121  
 Sum of electronic and thermal Free Energies= -450.548532

|       | E (Thermal)<br>KCal/Mol | CV<br>Cal/Mol-Kelvin | S<br>Cal/Mol-Kelvin |
|-------|-------------------------|----------------------|---------------------|
| Total | 72.619                  | 30.309               | 85.053              |

| Center<br>Number | Atomic<br>Number | Atomic<br>Type | Coordinates (Angstroms) |           |           |
|------------------|------------------|----------------|-------------------------|-----------|-----------|
|                  |                  |                | X                       | Y         | Z         |
| 1                | 6                | 0              | -0.237348               | -0.580481 | -0.029087 |
| 2                | 6                | 0              | -0.892308               | 0.709357  | -0.013819 |
| 3                | 6                | 0              | 1.247430                | 1.783710  | 0.010513  |
| 4                | 6                | 0              | 1.146488                | -0.659024 | -0.017088 |
| 5                | 6                | 0              | -2.428654               | -0.861865 | 0.024811  |
| 6                | 7                | 0              | -1.214130               | -1.529595 | -0.006891 |
| 7                | 7                | 0              | -2.198111               | 0.578536  | 0.015664  |
| 8                | 7                | 0              | 1.793529                | -1.911210 | -0.077194 |
| 9                | 1                | 0              | 2.578137                | -1.999335 | 0.562442  |
| 10               | 1                | 0              | 1.113565                | -2.652711 | 0.082400  |
| 11               | 7                | 0              | -0.123242               | 1.849651  | -0.001255 |
| 12               | 6                | 0              | 1.888962                | 0.562369  | -0.005635 |
| 13               | 1                | 0              | -0.599646               | 2.743481  | 0.025643  |
| 14               | 1                | 0              | 2.976620                | 0.542227  | -0.021174 |
| 15               | 1                | 0              | 1.777587                | 2.730267  | 0.020242  |

**N3-protonated amino N3H Z1 (Z1-23) B3LYP/6-31+G(d)**

SCF Done: E(RB3LYP) = -451.669848030

Zero-point correction= 0.137258  
(Hartree/Particle)  
Thermal correction to Energy= 0.144888  
Thermal correction to Enthalpy= 0.145832  
Thermal correction to Gibbs Free Energy= 0.105345  
Sum of electronic and zero-point Energies= -451.532590  
Sum of electronic and thermal Energies= -451.524961  
Sum of electronic and thermal Enthalpies= -451.524016  
Sum of electronic and thermal Free Energies= -451.564503

|       | E (Thermal)<br>KCal/Mol | CV<br>Cal/Mol-Kelvin | S<br>Cal/Mol-Kelvin |
|-------|-------------------------|----------------------|---------------------|
| Total | 90.918                  | 31.065               | 85.211              |

| Center<br>Number | Atomic<br>Number | Atomic<br>Type | Coordinates (Angstroms) |           |           |
|------------------|------------------|----------------|-------------------------|-----------|-----------|
|                  |                  |                | X                       | Y         | Z         |
| 1                | 6                | 0              | 0.194203                | -0.522149 | -0.000033 |
| 2                | 6                | 0              | 0.758208                | 0.762960  | -0.000057 |
| 3                | 6                | 0              | -1.380223               | 1.724563  | 0.000059  |
| 4                | 6                | 0              | -1.203334               | -0.720508 | -0.000015 |
| 5                | 6                | 0              | 2.407039                | -0.550407 | 0.000067  |
| 6                | 1                | 0              | -1.963539               | 2.637485  | 0.000059  |
| 7                | 1                | 0              | 3.411044                | -0.954617 | 0.000110  |
| 8                | 7                | 0              | 1.302645                | -1.356617 | -0.000049 |
| 9                | 7                | 0              | 2.113038                | 0.736637  | -0.000007 |
| 10               | 7                | 0              | -1.794618               | -1.930937 | -0.000092 |
| 11               | 1                | 0              | -2.802738               | -2.016552 | 0.000071  |
| 12               | 1                | 0              | -1.275409               | -2.796996 | -0.000191 |
| 13               | 7                | 0              | -0.031196               | 1.870139  | -0.000061 |
| 14               | 6                | 0              | -1.971335               | 0.480873  | 0.000115  |
| 15               | 1                | 0              | -3.054487               | 0.423965  | 0.000190  |
| 16               | 1                | 0              | 1.324388                | -2.368467 | 0.000612  |
| 17               | 1                | 0              | 0.404319                | 2.788635  | -0.000210 |

**N7-protonated amino N3H Z1 (Z1-24) B3LYP/6-31+G(d)**

SCF Done: E(RB3LYP) = -451.581556085

Zero-point correction= 0.135212  
(Hartree/Particle)  
Thermal correction to Energy= 0.143163  
Thermal correction to Enthalpy= 0.144107  
Thermal correction to Gibbs Free Energy= 0.102830  
Sum of electronic and zero-point Energies= -451.446344  
Sum of electronic and thermal Energies= -451.438393  
Sum of electronic and thermal Enthalpies= -451.437449  
Sum of electronic and thermal Free Energies= -451.478726

|  | E (Thermal)<br>KCal/Mol | CV<br>Cal/Mol-Kelvin | S<br>Cal/Mol-Kelvin |
|--|-------------------------|----------------------|---------------------|
|--|-------------------------|----------------------|---------------------|

Total 89.836 31.569 86.875

| Center Number | Atomic Number | Atomic Type | Coordinates (Angstroms) |           |           |
|---------------|---------------|-------------|-------------------------|-----------|-----------|
|               |               |             | X                       | Y         | Z         |
| 1             | 6             | 0           | -0.147183               | 0.445509  | -0.015585 |
| 2             | 6             | 0           | -0.672347               | -0.854275 | -0.011156 |
| 3             | 6             | 0           | 1.366579                | -1.764192 | 0.003455  |
| 4             | 6             | 0           | 1.231350                | 0.681687  | -0.005530 |
| 5             | 6             | 0           | -2.479903               | 0.371785  | 0.010930  |
| 6             | 7             | 0           | -1.287457               | 1.373487  | 0.004205  |
| 7             | 7             | 0           | -2.098598               | -0.823155 | -0.000937 |
| 8             | 7             | 0           | 1.820218                | 1.908667  | 0.035067  |
| 9             | 1             | 0           | 2.827523                | 1.975009  | -0.035580 |
| 10            | 1             | 0           | 1.322742                | 2.760315  | -0.181419 |
| 11            | 7             | 0           | 0.028312                | -1.962143 | -0.005194 |
| 12            | 6             | 0           | 1.988310                | -0.520794 | 0.004634  |
| 13            | 1             | 0           | 3.072992                | -0.465187 | 0.013726  |
| 14            | 1             | 0           | 1.974211                | -2.664547 | 0.008225  |
| 15            | 1             | 0           | -3.477976               | 0.794057  | 0.021914  |
| 16            | 1             | 0           | -1.354160               | 1.988606  | -0.820796 |
| 17            | 1             | 0           | -1.323482               | 1.975444  | 0.841462  |

**N10-protonated amino N3H Z1 (Z1-25) B3LYP/6-31+G(d)**

SCF Done: E(RB3LYP) = -451.613047976

Zero-point correction= 0.138373  
 (Hartree/Particle)  
 Thermal correction to Energy= 0.145840  
 Thermal correction to Enthalpy= 0.146784  
 Thermal correction to Gibbs Free Energy= 0.106317  
 Sum of electronic and zero-point Energies= -451.474675  
 Sum of electronic and thermal Energies= -451.467208  
 Sum of electronic and thermal Enthalpies= -451.466264  
 Sum of electronic and thermal Free Energies= -451.506731

|       | E (Thermal)<br>KCal/Mol | CV<br>Cal/Mol-Kelvin | S<br>Cal/Mol-Kelvin |
|-------|-------------------------|----------------------|---------------------|
| Total | 91.516                  | 29.387               | 85.170              |

| Center Number | Atomic Number | Atomic Type | Coordinates (Angstroms) |           |           |
|---------------|---------------|-------------|-------------------------|-----------|-----------|
|               |               |             | X                       | Y         | Z         |
| 1             | 6             | 0           | -0.199926               | -0.522451 | -0.000295 |
| 2             | 6             | 0           | -0.895759               | 0.743749  | -0.000134 |
| 3             | 6             | 0           | 1.191731                | 1.869377  | 0.000042  |
| 4             | 6             | 0           | 1.170979                | -0.528232 | -0.000173 |
| 5             | 6             | 0           | -2.275159               | -0.829684 | 0.000055  |
| 6             | 7             | 0           | -1.115685               | -1.519488 | -0.000178 |
| 7             | 7             | 0           | -2.204419               | 0.539455  | 0.000219  |



|    |   |   |           |           |           |
|----|---|---|-----------|-----------|-----------|
| 8  | 7 | 0 | 1.794374  | -1.876701 | 0.000197  |
| 9  | 1 | 0 | 2.373358  | -2.051687 | 0.832768  |
| 10 | 1 | 0 | 1.015012  | -2.562457 | 0.000063  |
| 11 | 7 | 0 | -0.170823 | 1.890670  | 0.000005  |
| 12 | 6 | 0 | 1.898649  | 0.674306  | -0.000049 |
| 13 | 1 | 0 | 2.982899  | 0.704382  | -0.000079 |
| 14 | 1 | 0 | 1.686619  | 2.832281  | 0.000081  |
| 15 | 1 | 0 | -3.234750 | -1.332565 | 0.000237  |
| 16 | 1 | 0 | -0.664427 | 2.782085  | 0.000353  |
| 17 | 1 | 0 | 2.374074  | -2.051975 | -0.831799 |

-----

**N10-deprotonated (N10H toward C1) amino N7H Z1 (Z1-26) B3LYP/6-31+G(d)**

SCF Done: E(RB3LYP) = -450.713850691

Zero-point correction= 0.109637  
(Hartree/Particle)

Thermal correction to Energy= 0.116593

Thermal correction to Enthalpy= 0.117537

Thermal correction to Gibbs Free Energy= 0.078184

Sum of electronic and zero-point Energies= -450.604214

Sum of electronic and thermal Energies= -450.597258

Sum of electronic and thermal Enthalpies= -450.596313

Sum of electronic and thermal Free Energies= -450.635667

|       | E (Thermal) | CV             | S              |
|-------|-------------|----------------|----------------|
|       | KCal/Mol    | Cal/Mol-Kelvin | Cal/Mol-Kelvin |
| Total | 73.163      | 28.134         | 82.826         |

-----

| Center<br>Number | Atomic<br>Number | Atomic<br>Type | Coordinates (Angstroms) |           |           |
|------------------|------------------|----------------|-------------------------|-----------|-----------|
|                  |                  |                | X                       | Y         | Z         |
| 1                | 6                | 0              | -0.184155               | 0.499545  | -0.019836 |
| 2                | 6                | 0              | -0.672366               | -0.828840 | -0.003537 |
| 3                | 6                | 0              | 1.415186                | -1.662557 | 0.014977  |
| 4                | 6                | 0              | 1.190445                | 0.765612  | -0.049918 |
| 5                | 6                | 0              | -2.393385               | 0.441857  | 0.013569  |
| 6                | 1                | 0              | 2.071038                | -2.531261 | 0.033986  |
| 7                | 1                | 0              | -3.408339               | 0.819061  | 0.034631  |
| 8                | 7                | 0              | -1.315090               | 1.301739  | -0.024376 |
| 9                | 7                | 0              | -2.060873               | -0.822358 | 0.011215  |
| 10               | 7                | 0              | 1.699188                | 2.067774  | -0.039454 |
| 11               | 7                | 0              | 0.106285                | -1.920227 | 0.012098  |
| 12               | 6                | 0              | 1.995206                | -0.379792 | -0.017661 |
| 13               | 1                | 0              | 3.078264                | -0.283638 | -0.027688 |
| 14               | 1                | 0              | -1.357463               | 2.302444  | 0.107595  |
| 15               | 1                | 0              | 2.504356                | 2.289948  | 0.509534  |

-----

**N10-deprotonated (N10H toward N7) amino N7H Z1 (Z1-27) B3LYP/6-31+G(d)**

SCF Done: E(RB3LYP) = -450.707429554

Zero-point correction= 0.108863  
 (Hartree/Particle)  
 Thermal correction to Energy= 0.116063  
 Thermal correction to Enthalpy= 0.117008  
 Thermal correction to Gibbs Free Energy= 0.077174  
 Sum of electronic and zero-point Energies= -450.598567  
 Sum of electronic and thermal Energies= -450.591366  
 Sum of electronic and thermal Enthalpies= -450.590422  
 Sum of electronic and thermal Free Energies= -450.630255

|       | E (Thermal)<br>KCal/Mol | CV<br>Cal/Mol-Kelvin | S<br>Cal/Mol-Kelvin |
|-------|-------------------------|----------------------|---------------------|
| Total | 72.831                  | 28.747               | 83.836              |

| Center<br>Number | Atomic<br>Number | Atomic<br>Type | Coordinates (Angstroms) |           |           |
|------------------|------------------|----------------|-------------------------|-----------|-----------|
|                  |                  |                | X                       | Y         | Z         |
| 1                | 6                | 0              | -0.178319               | 0.470440  | 0.000815  |
| 2                | 6                | 0              | -0.634501               | -0.860490 | 0.000118  |
| 3                | 6                | 0              | 1.473092                | -1.616743 | -0.000014 |
| 4                | 6                | 0              | 1.207808                | 0.856848  | -0.000119 |
| 5                | 6                | 0              | -2.394324               | 0.380197  | -0.000365 |
| 6                | 1                | 0              | 2.162270                | -2.465388 | 0.000170  |
| 7                | 1                | 0              | -3.418447               | 0.736311  | -0.000248 |
| 8                | 7                | 0              | -1.332306               | 1.247755  | 0.000742  |
| 9                | 7                | 0              | -2.032236               | -0.883346 | -0.000509 |
| 10               | 7                | 0              | 1.715103                | 2.088450  | -0.000468 |
| 11               | 1                | 0              | 0.953327                | 2.777487  | -0.000592 |
| 12               | 7                | 0              | 0.165324                | -1.950599 | -0.000045 |
| 13               | 6                | 0              | 2.020425                | -0.332378 | 0.000137  |
| 14               | 1                | 0              | 3.101600                | -0.207693 | -0.000227 |
| 15               | 1                | 0              | -1.375042               | 2.256211  | -0.000580 |

**C8-deprotonated amino N7H Z1 (Z1-28) B3LYP/6-31+G(d)**

SCF Done: E(RB3LYP) = -450.665088043  
 Zero-point correction= 0.108722  
 (Hartree/Particle)  
 Thermal correction to Energy= 0.116216  
 Thermal correction to Enthalpy= 0.117161  
 Thermal correction to Gibbs Free Energy= 0.076870  
 Sum of electronic and zero-point Energies= -450.556366  
 Sum of electronic and thermal Energies= -450.548872  
 Sum of electronic and thermal Enthalpies= -450.547928  
 Sum of electronic and thermal Free Energies= -450.588218

|       | E (Thermal)<br>KCal/Mol | CV<br>Cal/Mol-Kelvin | S<br>Cal/Mol-Kelvin |
|-------|-------------------------|----------------------|---------------------|
| Total | 72.927                  | 29.781               | 84.798              |

| Center | Atomic | Atomic | Coordinates (Angstroms) |  |  |
|--------|--------|--------|-------------------------|--|--|
|--------|--------|--------|-------------------------|--|--|

| Number | Number | Type | X         | Y         | Z         |
|--------|--------|------|-----------|-----------|-----------|
| 1      | 6      | 0    | -0.195949 | -0.502793 | -0.031790 |
| 2      | 6      | 0    | -0.829565 | 0.778206  | 0.007940  |
| 3      | 6      | 0    | 1.191500  | 1.816150  | -0.004218 |
| 4      | 6      | 0    | 1.188618  | -0.613770 | -0.018617 |
| 5      | 6      | 0    | -2.500847 | -0.694014 | -0.000781 |
| 6      | 7      | 0    | -1.253479 | -1.389867 | -0.011402 |
| 7      | 7      | 0    | -2.194686 | 0.625569  | 0.030132  |
| 8      | 7      | 0    | 1.847062  | -1.872499 | -0.059769 |
| 9      | 1      | 0    | 2.796901  | -1.819607 | 0.297640  |
| 10     | 1      | 0    | 1.338882  | -2.589806 | 0.451074  |
| 11     | 7      | 0    | -0.140924 | 1.940815  | 0.018441  |
| 12     | 6      | 0    | 1.898183  | 0.601586  | -0.019784 |
| 13     | 1      | 0    | -1.199130 | -2.387029 | -0.155521 |
| 14     | 1      | 0    | 2.988018  | 0.606030  | -0.028436 |
| 15     | 1      | 0    | 1.757881  | 2.750097  | -0.003080 |

**C1-deprotonated amino N7H Z1 (Z1-29) B3LYP/6-31+G(d)**

SCF Done: E(RB3LYP) = -450.651539092

Zero-point correction= 0.109268

(Hartree/Particle)

Thermal correction to Energy= 0.116665

Thermal correction to Enthalpy= 0.117610

Thermal correction to Gibbs Free Energy= 0.077459

Sum of electronic and zero-point Energies= -450.542272

Sum of electronic and thermal Energies= -450.534874

Sum of electronic and thermal Enthalpies= -450.533930

Sum of electronic and thermal Free Energies= -450.574080

|       | E (Thermal) | CV             | S              |
|-------|-------------|----------------|----------------|
|       | KCal/Mol    | Cal/Mol-Kelvin | Cal/Mol-Kelvin |
| Total | 73.209      | 29.265         | 84.505         |

| Center Number | Atomic Number | Atomic Type | Coordinates (Angstroms) |           |           |
|---------------|---------------|-------------|-------------------------|-----------|-----------|
|               |               |             | X                       | Y         | Z         |
| 1             | 6             | 0           | -0.126613               | -0.455686 | -0.011224 |
| 2             | 6             | 0           | -0.728957               | 0.820897  | 0.026073  |
| 3             | 6             | 0           | 1.314584                | 1.776930  | -0.016938 |
| 4             | 6             | 0           | 1.268733                | -0.588500 | -0.015457 |
| 5             | 6             | 0           | -2.346643               | -0.595630 | -0.019310 |
| 6             | 1             | 0           | 1.864200                | 2.723484  | -0.024374 |
| 7             | 1             | 0           | -3.327900               | -1.057226 | -0.040291 |
| 8             | 7             | 0           | -1.195293               | -1.358369 | -0.010711 |
| 9             | 7             | 0           | -2.124422               | 0.694553  | 0.028258  |
| 10            | 7             | 0           | 1.850953                | -1.902810 | -0.050580 |
| 11            | 1             | 0           | 2.861685                | -1.763501 | 0.006703  |
| 12            | 1             | 0           | 1.561510                | -2.466133 | 0.751199  |
| 13            | 7             | 0           | -0.027825               | 1.962257  | 0.032423  |
| 14            | 6             | 0           | 2.060229                | 0.564339  | -0.038275 |

15 1 0 -1.131391 -2.340127 -0.238171

-----  
**C2-deprotonated amino N7H Z1 (Z1-30) B3LYP/6-31+G(d)**

SCF Done: E(RB3LYP) = -450.623088858

Zero-point correction= 0.107964  
(Hartree/Particle)  
Thermal correction to Energy= 0.115588  
Thermal correction to Enthalpy= 0.116533  
Thermal correction to Gibbs Free Energy= 0.075942  
Sum of electronic and zero-point Energies= -450.515125  
Sum of electronic and thermal Energies= -450.507500  
Sum of electronic and thermal Enthalpies= -450.506556  
Sum of electronic and thermal Free Energies= -450.547147

|       | E (Thermal)<br>KCal/Mol | CV<br>Cal/Mol-Kelvin | S<br>Cal/Mol-Kelvin |
|-------|-------------------------|----------------------|---------------------|
| Total | 72.533                  | 29.998               | 85.431              |

-----

| Center<br>Number | Atomic<br>Number | Atomic<br>Type | Coordinates (Angstroms) |           |           |
|------------------|------------------|----------------|-------------------------|-----------|-----------|
|                  |                  |                | X                       | Y         | Z         |
| 1                | 6                | 0              | -0.110314               | -0.446137 | -0.008476 |
| 2                | 6                | 0              | -0.786344               | 0.797081  | 0.016283  |
| 3                | 6                | 0              | 1.157473                | 1.925887  | -0.009608 |
| 4                | 6                | 0              | 1.288660                | -0.509987 | -0.004309 |
| 5                | 6                | 0              | -2.304771               | -0.709761 | -0.009786 |
| 6                | 1                | 0              | -3.254451               | -1.230035 | -0.026522 |
| 7                | 7                | 0              | -1.112607               | -1.404239 | -0.008985 |
| 8                | 7                | 0              | -2.159255               | 0.588974  | 0.020597  |
| 9                | 7                | 0              | 1.980729                | -1.723652 | -0.055427 |
| 10               | 1                | 0              | 2.977949                | -1.642286 | 0.109726  |
| 11               | 1                | 0              | 1.586475                | -2.473342 | 0.502804  |
| 12               | 7                | 0              | -0.174714               | 1.990217  | 0.018045  |
| 13               | 6                | 0              | 1.917991                | 0.740766  | -0.018129 |
| 14               | 1                | 0              | -1.011603               | -2.397074 | -0.166145 |
| 15               | 1                | 0              | 2.986398                | 0.796537  | -0.035319 |

-----

**N7-protonated amino N7H Z1 (Z1-31) B3LYP/6-31+G(d)**

SCF Done: E(RB3LYP) = -451.581556085

Zero-point correction= 0.135212  
(Hartree/Particle)  
Thermal correction to Energy= 0.143163  
Thermal correction to Enthalpy= 0.144107  
Thermal correction to Gibbs Free Energy= 0.102830  
Sum of electronic and zero-point Energies= -451.446344  
Sum of electronic and thermal Energies= -451.438393  
Sum of electronic and thermal Enthalpies= -451.437449  
Sum of electronic and thermal Free Energies= -451.478726

|       |             |                |                |
|-------|-------------|----------------|----------------|
|       | E (Thermal) | CV             | S              |
|       | KCal/Mol    | Cal/Mol-Kelvin | Cal/Mol-Kelvin |
| Total | 89.836      | 31.569         | 86.875         |

| Center Number | Atomic Number | Atomic Type | Coordinates (Angstroms) |           |           |
|---------------|---------------|-------------|-------------------------|-----------|-----------|
|               |               |             | X                       | Y         | Z         |
| 1             | 6             | 0           | -0.147183               | 0.445509  | -0.015585 |
| 2             | 6             | 0           | -0.672347               | -0.854275 | -0.011156 |
| 3             | 6             | 0           | 1.366579                | -1.764192 | 0.003455  |
| 4             | 6             | 0           | 1.231350                | 0.681687  | -0.005530 |
| 5             | 6             | 0           | -2.479903               | 0.371785  | 0.010930  |
| 6             | 7             | 0           | -1.287457               | 1.373487  | 0.004205  |
| 7             | 7             | 0           | -2.098598               | -0.823155 | -0.000937 |
| 8             | 7             | 0           | 1.820218                | 1.908667  | 0.035067  |
| 9             | 1             | 0           | 2.827523                | 1.975009  | -0.035580 |
| 10            | 1             | 0           | 1.322742                | 2.760315  | -0.181419 |
| 11            | 7             | 0           | 0.028312                | -1.962143 | -0.005194 |
| 12            | 6             | 0           | 1.988310                | -0.520794 | 0.004634  |
| 13            | 1             | 0           | 3.072992                | -0.465187 | 0.013726  |
| 14            | 1             | 0           | 1.974211                | -2.664547 | 0.008225  |
| 15            | 1             | 0           | -3.477976               | 0.794057  | 0.021914  |
| 16            | 1             | 0           | -1.354160               | 1.988606  | -0.820796 |
| 17            | 1             | 0           | -1.323482               | 1.975444  | 0.841462  |

***N10-protonated amino N7H Z1 (Z1-32) B3LYP/6-31+G(d)***

SCF Done: E(RB3LYP) = -451.602410280

|                                              |             |
|----------------------------------------------|-------------|
| Zero-point correction=                       | 0.137149    |
| (Hartree/Particle)                           |             |
| Thermal correction to Energy=                | 0.144923    |
| Thermal correction to Enthalpy=              | 0.145867    |
| Thermal correction to Gibbs Free Energy=     | 0.104749    |
| Sum of electronic and zero-point Energies=   | -451.465262 |
| Sum of electronic and thermal Energies=      | -451.457488 |
| Sum of electronic and thermal Enthalpies=    | -451.456544 |
| Sum of electronic and thermal Free Energies= | -451.497662 |

|       |             |                |                |
|-------|-------------|----------------|----------------|
|       | E (Thermal) | CV             | S              |
|       | KCal/Mol    | Cal/Mol-Kelvin | Cal/Mol-Kelvin |
| Total | 90.940      | 30.357         | 86.540         |

| Center Number | Atomic Number | Atomic Type | Coordinates (Angstroms) |           |           |
|---------------|---------------|-------------|-------------------------|-----------|-----------|
|               |               |             | X                       | Y         | Z         |
| 1             | 6             | 0           | 0.184893                | -0.494637 | -0.000079 |
| 2             | 6             | 0           | 0.843973                | 0.779504  | 0.000000  |
| 3             | 6             | 0           | -1.116056               | 1.917963  | -0.000084 |
| 4             | 6             | 0           | -1.204141               | -0.487051 | -0.000044 |
| 5             | 6             | 0           | 2.388878                | -0.691323 | 0.000028  |

|    |   |   |           |           |           |
|----|---|---|-----------|-----------|-----------|
| 6  | 7 | 0 | 1.203250  | -1.420652 | -0.000016 |
| 7  | 7 | 0 | 2.211061  | 0.597444  | 0.000064  |
| 8  | 7 | 0 | -2.000404 | -1.752100 | 0.000068  |
| 9  | 1 | 0 | -3.006291 | -1.534590 | -0.000080 |
| 10 | 1 | 0 | -1.820403 | -2.331808 | -0.832067 |
| 11 | 7 | 0 | 0.214785  | 1.952468  | 0.000031  |
| 12 | 6 | 0 | -1.875039 | 0.729614  | -0.000001 |
| 13 | 1 | 0 | -2.960777 | 0.783999  | 0.000032  |
| 14 | 1 | 0 | -1.628712 | 2.875871  | 0.000083  |
| 15 | 1 | 0 | 3.347324  | -1.195303 | 0.000051  |
| 16 | 1 | 0 | 1.153540  | -2.431202 | -0.000421 |
| 17 | 1 | 0 | -1.820573 | -2.331500 | 0.832456  |

**Q ("6-methylated" 1-deazaadenine): neutral, protonated and deprotonated species**

**Amino N9H Q (Q-1) B3LYP/6-31+G(d)**

SCF Done: E(RB+HF-LYP) = -435.246411281 A.U.

Zero-point correction= 0.134517  
(Hartree/Particle)  
Thermal correction to Energy= 0.142177  
Thermal correction to Enthalpy= 0.143121  
Thermal correction to Gibbs Free Energy= 0.102006  
Sum of electronic and zero-point Energies= -435.111894  
Sum of electronic and thermal Energies= -435.104235  
Sum of electronic and thermal Enthalpies= -435.103290  
Sum of electronic and thermal Free Energies= -435.144406

|       | E (Thermal) | CV             | S              |
|-------|-------------|----------------|----------------|
|       | KCal/Mol    | Cal/Mol-Kelvin | Cal/Mol-Kelvin |
| Total | 89.217      | 29.842         | 86.534         |

| Center Number | Atomic Number | Atomic Type | Coordinates (Angstroms) |           |           |
|---------------|---------------|-------------|-------------------------|-----------|-----------|
|               |               |             | X                       | Y         | Z         |
| 1             | 6             | 0           | -0.138158               | -0.514047 | 0.000172  |
| 2             | 6             | 0           | -0.784291               | 0.743760  | 0.000209  |
| 3             | 6             | 0           | 1.119115                | 1.901546  | -0.000047 |
| 4             | 6             | 0           | 1.877261                | 0.714161  | -0.000435 |
| 5             | 6             | 0           | 1.265692                | -0.544776 | 0.000035  |
| 6             | 6             | 0           | -2.234625               | -0.927264 | -0.000312 |
| 7             | 1             | 0           | 1.626447                | 2.863859  | -0.000524 |
| 8             | 1             | 0           | 2.961876                | 0.787570  | -0.000477 |
| 9             | 1             | 0           | -3.197081               | -1.423472 | -0.000319 |
| 10            | 6             | 0           | 2.033402                | -1.837595 | 0.000155  |
| 11            | 1             | 0           | 1.779408                | -2.441434 | 0.879513  |
| 12            | 1             | 0           | 1.778664                | -2.441962 | -0.878661 |
| 13            | 1             | 0           | 3.112985                | -1.658208 | -0.000436 |
| 14            | 7             | 0           | -0.220236               | 1.948928  | 0.000363  |
| 15            | 7             | 0           | -2.134424               | 0.445250  | -0.000014 |
| 16            | 1             | 0           | -2.889106               | 1.117834  | -0.000309 |
| 17            | 7             | 0           | -1.074420               | -1.539735 | 0.000015  |

-----

**Amino N9H-Q (Q1) B3LYP/6-31+G(d) cpcm in water; RADII=UAKS**

SCF Done: E(RB+HF-LYP) = -435.266619084  
 Total free energy in solution:  
 with all non electrostatic terms (a.u.) = -435.264828

---

|                            |              |        |
|----------------------------|--------------|--------|
| (Polarized solute)-Solvent | (kcal/mol) = | -15.17 |
|----------------------------|--------------|--------|

---

|                         |              |        |
|-------------------------|--------------|--------|
| Cavitation energy       | (kcal/mol) = | 17.50  |
| Dispersion energy       | (kcal/mol) = | -20.92 |
| Repulsion energy        | (kcal/mol) = | 4.54   |
| Total non electrostatic | (kcal/mol) = | 1.12   |

---

**Amino N7H Q (Q-2) B3LYP/6-31+G(d)**

SCF Done: E(RB+HF-LYP) = -435.238739643 A.U.

|                                              |             |
|----------------------------------------------|-------------|
| Zero-point correction=                       | 0.134231    |
| (Hartree/Particle)                           |             |
| Thermal correction to Energy=                | 0.141913    |
| Thermal correction to Enthalpy=              | 0.142857    |
| Thermal correction to Gibbs Free Energy=     | 0.101905    |
| Sum of electronic and zero-point Energies=   | -435.104508 |
| Sum of electronic and thermal Energies=      | -435.096827 |
| Sum of electronic and thermal Enthalpies=    | -435.095883 |
| Sum of electronic and thermal Free Energies= | -435.136834 |

|       | E (Thermal) | CV             | S              |
|-------|-------------|----------------|----------------|
|       | KCal/Mol    | Cal/Mol-Kelvin | Cal/Mol-Kelvin |
| Total | 89.052      | 30.046         | 86.190         |

---

| Center Number | Atomic Number | Atomic Type | Coordinates (Angstroms) |           |           |
|---------------|---------------|-------------|-------------------------|-----------|-----------|
|               |               |             | X                       | Y         | Z         |
| 1             | 6             | 0           | 0.147415                | -0.466283 | -0.000056 |
| 2             | 6             | 0           | 0.807896                | 0.789594  | 0.000049  |
| 3             | 6             | 0           | -1.161394               | 1.882173  | -0.000006 |
| 4             | 6             | 0           | -1.893948               | 0.676291  | -0.000067 |
| 5             | 6             | 0           | -1.247631               | -0.562290 | 0.000010  |
| 6             | 6             | 0           | 2.350051                | -0.687638 | 0.000015  |
| 7             | 6             | 0           | -1.978150               | -1.880082 | 0.000094  |
| 8             | 1             | 0           | -1.725579               | -2.479408 | -0.885004 |
| 9             | 1             | 0           | -1.725430               | -2.479366 | 0.885194  |
| 10            | 1             | 0           | -3.061763               | -1.728658 | 0.000195  |
| 11            | 7             | 0           | 0.169920                | 1.966514  | 0.000025  |
| 12            | 7             | 0           | 2.183760                | 0.609442  | 0.000072  |
| 13            | 7             | 0           | 1.168830                | -1.400450 | -0.000182 |
| 14            | 1             | 0           | 3.308359                | -1.192128 | 0.000247  |
| 15            | 1             | 0           | -2.980286               | 0.718051  | -0.000059 |
| 16            | 1             | 0           | -1.698409               | 2.828972  | -0.000141 |
| 17            | 1             | 0           | 1.080096                | -2.406598 | -0.000071 |

---

**Amino N7H-Q (Q2) B3LYP/6-31+G(d) cpcm in water; RADII=UAKS**

Total free energy in solution:  
with all non electrostatic terms (a.u.) = -435.264473

---

|                            |              |        |
|----------------------------|--------------|--------|
| (Polarized solute)-Solvent | (kcal/mol) = | -23.33 |
|----------------------------|--------------|--------|

---

|                         |              |        |
|-------------------------|--------------|--------|
| Cavitation energy       | (kcal/mol) = | 17.45  |
| Dispersion energy       | (kcal/mol) = | -20.68 |
| Repulsion energy        | (kcal/mol) = | 4.35   |
| Total non electrostatic | (kcal/mol) = | 1.12   |

---

**Amino N3H Q (Q-3) B3LYP/6-31+G(d)**

SCF Done: E(RB+HF-LYP) = -435.232274269 A.U.

|                                              |             |
|----------------------------------------------|-------------|
| Zero-point correction=                       | 0.134649    |
| (Hartree/Particle)                           |             |
| Thermal correction to Energy=                | 0.142370    |
| Thermal correction to Enthalpy=              | 0.143314    |
| Thermal correction to Gibbs Free Energy=     | 0.101472    |
| Sum of electronic and zero-point Energies=   | -435.097625 |
| Sum of electronic and thermal Energies=      | -435.089905 |
| Sum of electronic and thermal Enthalpies=    | -435.088960 |
| Sum of electronic and thermal Free Energies= | -435.130802 |

|       | E (Thermal)<br>KCal/Mol | CV<br>Cal/Mol-Kelvin | S<br>Cal/Mol-Kelvin |
|-------|-------------------------|----------------------|---------------------|
| Total | 89.338                  | 29.709               | 88.063              |

| Center<br>Number | Atomic<br>Number | Atomic<br>Type | Coordinates (Angstroms) |           |           |
|------------------|------------------|----------------|-------------------------|-----------|-----------|
|                  |                  |                | X                       | Y         | Z         |
| 1                | 6                | 0              | -0.174912               | -0.561445 | -0.001701 |
| 2                | 6                | 0              | -0.887518               | 0.692651  | 0.001020  |
| 3                | 6                | 0              | 1.162541                | 1.864790  | -0.000208 |
| 4                | 6                | 0              | 1.866205                | 0.676473  | -0.003437 |
| 5                | 6                | 0              | 1.214029                | -0.587006 | -0.003371 |
| 6                | 6                | 0              | -2.265845               | -0.873255 | -0.000749 |
| 7                | 1                | 0              | 1.642232                | 2.836109  | -0.000530 |
| 8                | 1                | 0              | 2.950942                | 0.724147  | -0.006738 |
| 9                | 1                | 0              | -3.227754               | -1.374169 | -0.001274 |
| 10               | 6                | 0              | 1.990391                | -1.874659 | 0.002871  |
| 11               | 1                | 0              | 2.538990                | -1.991111 | 0.946819  |
| 12               | 1                | 0              | 1.318434                | -2.728098 | -0.111563 |
| 13               | 1                | 0              | 2.730111                | -1.891813 | -0.807068 |
| 14               | 7                | 0              | -0.200474               | 1.866120  | 0.002368  |
| 15               | 7                | 0              | -2.203143               | 0.500482  | 0.001932  |
| 16               | 7                | 0              | -1.119448               | -1.557744 | -0.002940 |
| 17               | 1                | 0              | -0.720843               | 2.737638  | 0.004281  |



### ***N9-deprotonated amino N9H Q (Q-4) B3LYP/6-31+G(d)***

SCF Done: E(RB+HF-LYP) = -434.695464953 A.U.

Zero-point correction= 0.120772  
(Hartree/Particle)  
Thermal correction to Energy= 0.128156  
Thermal correction to Enthalpy= 0.129101  
Thermal correction to Gibbs Free Energy= 0.088480  
Sum of electronic and zero-point Energies= -434.574693  
Sum of electronic and thermal Energies= -434.567309  
Sum of electronic and thermal Enthalpies= -434.566364  
Sum of electronic and thermal Free Energies= -434.606985

|       | E (Thermal)<br>KCal/Mol | CV<br>Cal/Mol-Kelvin | S<br>Cal/Mol-Kelvin |
|-------|-------------------------|----------------------|---------------------|
| Total | 80.419                  | 28.470               | 85.493              |

| Center<br>Number | Atomic<br>Number | Atomic<br>Type | Coordinates (Angstroms) |           |           |
|------------------|------------------|----------------|-------------------------|-----------|-----------|
|                  |                  |                | X                       | Y         | Z         |
| 1                | 6                | 0              | -0.178864               | -0.516217 | -0.000012 |
| 2                | 6                | 0              | -0.861769               | 0.755265  | -0.000015 |
| 3                | 6                | 0              | 1.095673                | 1.891726  | 0.000000  |
| 4                | 6                | 0              | 1.853824                | 0.701627  | 0.000033  |
| 5                | 6                | 0              | 1.222294                | -0.550005 | 0.000004  |
| 6                | 6                | 0              | -2.268142               | -0.823892 | 0.000022  |
| 7                | 1                | 0              | 1.617181                | 2.851608  | 0.000056  |
| 8                | 1                | 0              | 2.942316                | 0.766010  | 0.000026  |
| 9                | 1                | 0              | -3.227093               | -1.339257 | -0.000030 |
| 10               | 6                | 0              | 1.984616                | -1.851158 | -0.000026 |
| 11               | 1                | 0              | 1.728538                | -2.458360 | 0.878583  |
| 12               | 1                | 0              | 1.727990                | -2.458629 | -0.878292 |
| 13               | 1                | 0              | 3.069093                | -1.679461 | -0.000383 |
| 14               | 7                | 0              | -0.240854               | 1.952834  | -0.000016 |
| 15               | 7                | 0              | -2.211379               | 0.524701  | -0.000018 |
| 16               | 7                | 0              | -1.111169               | -1.524104 | 0.000034  |

### ***CH3-deprotonated amino N9H Q (Q-5) B3LYP/6-31+G(d)***

SCF Done: E(RB3LYP) = -434.647666329

Zero-point correction= 0.119549  
(Hartree/Particle)  
Thermal correction to Energy= 0.126971  
Thermal correction to Enthalpy= 0.127916  
Thermal correction to Gibbs Free Energy= 0.087787  
Sum of electronic and zero-point Energies= -434.528117  
Sum of electronic and thermal Energies= -434.520695  
Sum of electronic and thermal Enthalpies= -434.519751  
Sum of electronic and thermal Free Energies= -434.559879

| E (Thermal)<br>KCal/Mol | CV<br>Cal/Mol-Kelvin | S<br>Cal/Mol-Kelvin |
|-------------------------|----------------------|---------------------|
|-------------------------|----------------------|---------------------|

| Total         | 79.676        |             | 30.274                  |           | 84.458    |
|---------------|---------------|-------------|-------------------------|-----------|-----------|
| Center Number | Atomic Number | Atomic Type | Coordinates (Angstroms) |           |           |
|               |               |             | X                       | Y         | Z         |
| 1             | 6             | 0           | -0.160351               | -0.541130 | -0.000157 |
| 2             | 6             | 0           | -0.682183               | 0.762963  | -0.000199 |
| 3             | 6             | 0           | 1.305118                | 1.753186  | 0.000134  |
| 4             | 6             | 0           | 1.966071                | 0.536963  | -0.000030 |
| 5             | 6             | 0           | 1.277767                | -0.747968 | -0.000083 |
| 6             | 6             | 0           | -2.301680               | -0.771220 | 0.000266  |
| 7             | 1             | 0           | 1.899560                | 2.670095  | 0.000212  |
| 8             | 1             | 0           | 3.056171                | 0.538166  | -0.000012 |
| 9             | 1             | 0           | -3.306805               | -1.176064 | -0.000061 |
| 10            | 6             | 0           | 1.901561                | -1.973849 | 0.000084  |
| 11            | 1             | 0           | 2.987807                | -2.046523 | -0.000111 |
| 12            | 7             | 0           | -0.045084               | 1.949488  | 0.000093  |
| 13            | 7             | 0           | -2.059864               | 0.589562  | -0.000562 |
| 14            | 1             | 0           | -2.734155               | 1.340709  | 0.002145  |
| 15            | 7             | 0           | -1.190737               | -1.473847 | 0.000119  |
| 16            | 1             | 0           | 1.329401                | -2.896469 | 0.000181  |

**C8-deprotonated amino N9H Q (Q-6) B3LYP/6-31+G(d)**

SCF Done: E(RB+HF-LYP) = -434.634764086 A.U.

Zero-point correction= 0.119812  
(Hartree/Particle)  
Thermal correction to Energy= 0.127517  
Thermal correction to Enthalpy= 0.128461  
Thermal correction to Gibbs Free Energy= 0.087251  
Sum of electronic and zero-point Energies= -434.514953  
Sum of electronic and thermal Energies= -434.507247  
Sum of electronic and thermal Enthalpies= -434.506303  
Sum of electronic and thermal Free Energies= -434.547513

|       | E (Thermal)<br>KCal/Mol | CV<br>Cal/Mol-Kelvin | S<br>Cal/Mol-Kelvin |
|-------|-------------------------|----------------------|---------------------|
| Total | 80.018                  | 29.795               | 86.734              |

| Center Number | Atomic Number | Atomic Type | Coordinates (Angstroms) |           |           |
|---------------|---------------|-------------|-------------------------|-----------|-----------|
|               |               |             | X                       | Y         | Z         |
| 1             | 6             | 0           | -0.161026               | -0.546735 | 0.000133  |
| 2             | 6             | 0           | -0.863028               | 0.697145  | 0.000088  |
| 3             | 6             | 0           | 1.011985                | 1.938036  | -0.000002 |
| 4             | 6             | 0           | 1.813136                | 0.785903  | -0.000083 |
| 5             | 6             | 0           | 1.239325                | -0.499735 | -0.000010 |
| 6             | 6             | 0           | -2.316057               | -1.103441 | -0.000107 |
| 7             | 1             | 0           | 1.478131                | 2.924005  | -0.000080 |
| 8             | 1             | 0           | 2.897589                | 0.896903  | -0.000197 |
| 9             | 6             | 0           | 2.064449                | -1.760730 | -0.000014 |
| 10            | 1             | 0           | 1.835322                | -2.378991 | 0.877859  |
| 11            | 1             | 0           | 1.833815                | -2.379923 | -0.876817 |

|    |   |   |           |           |           |
|----|---|---|-----------|-----------|-----------|
| 12 | 1 | 0 | 3.139233  | -1.537000 | -0.000995 |
| 13 | 7 | 0 | -0.336849 | 1.924236  | 0.000065  |
| 14 | 7 | 0 | -2.179850 | 0.314900  | -0.000060 |
| 15 | 7 | 0 | -1.048123 | -1.601886 | 0.000042  |
| 16 | 1 | 0 | -2.963040 | 0.951597  | -0.000133 |

---

**C1-deprotonated amino N9H Q (Q-7) B3LYP/6-31+G(d)**

SCF Done: E(RB+HF-LYP) = -434.608064455 A.U.  
Zero-point correction= 0.119434  
(Hartree/Particle)  
Thermal correction to Energy= 0.127325  
Thermal correction to Enthalpy= 0.128269  
Thermal correction to Gibbs Free Energy= 0.086634  
Sum of electronic and zero-point Energies= -434.488631  
Sum of electronic and thermal Energies= -434.480740  
Sum of electronic and thermal Enthalpies= -434.479796  
Sum of electronic and thermal Free Energies= -434.521431

|       | E (Thermal) | CV             | S              |
|-------|-------------|----------------|----------------|
|       | KCal/Mol    | Cal/Mol-Kelvin | Cal/Mol-Kelvin |
| Total | 79.897      | 30.085         | 87.628         |

---

| Center<br>Number | Atomic<br>Number | Atomic<br>Type | Coordinates (Angstroms) |           |           |
|------------------|------------------|----------------|-------------------------|-----------|-----------|
|                  |                  |                | X                       | Y         | Z         |
| 1                | 6                | 0              | -0.084345               | -0.496711 | -0.000018 |
| 2                | 6                | 0              | -0.764255               | 0.738115  | 0.000006  |
| 3                | 6                | 0              | 1.136631                | 1.906125  | 0.000027  |
| 4                | 6                | 0              | 1.999470                | 0.773759  | 0.000014  |
| 5                | 6                | 0              | 1.329647                | -0.471241 | -0.000119 |
| 6                | 6                | 0              | -2.189230               | -0.967269 | 0.000063  |
| 7                | 1                | 0              | 1.579441                | 2.907108  | 0.000106  |
| 8                | 6                | 0              | 2.089632                | -1.781990 | 0.000023  |
| 9                | 1                | 0              | 1.845382                | -2.395148 | 0.881541  |
| 10               | 1                | 0              | 1.843865                | -2.396254 | -0.880301 |
| 11               | 1                | 0              | 3.163491                | -1.568399 | -0.000952 |
| 12               | 7                | 0              | -0.225839               | 1.952955  | -0.000014 |
| 13               | 7                | 0              | -2.119317               | 0.407930  | -0.000029 |
| 14               | 7                | 0              | -1.013443               | -1.551502 | -0.000019 |
| 15               | 1                | 0              | -2.884388               | 1.066417  | 0.000073  |
| 16               | 1                | 0              | -3.142895               | -1.484127 | -0.000005 |

---

**C2-deprotonated amino N9H Q (Q-8) B3LYP/6-31+G(d)**

SCF Done: E(RB+HF-LYP) = -434.598944701 A.U.  
Zero-point correction= 0.119096  
(Hartree/Particle)  
Thermal correction to Energy= 0.126931  
Thermal correction to Enthalpy= 0.127875  
Thermal correction to Gibbs Free Energy= 0.086613  
Sum of electronic and zero-point Energies= -434.479849  
Sum of electronic and thermal Energies= -434.472014

Sum of electronic and thermal Enthalpies= -434.471070  
 Sum of electronic and thermal Free Energies= -434.512331

|       | E (Thermal)<br>KCal/Mol | CV<br>Cal/Mol-Kelvin | S<br>Cal/Mol-Kelvin |
|-------|-------------------------|----------------------|---------------------|
| Total | 79.650                  | 30.271               | 86.842              |

| Center<br>Number | Atomic<br>Number | Atomic<br>Type | Coordinates (Angstroms) |           |           |
|------------------|------------------|----------------|-------------------------|-----------|-----------|
|                  |                  |                | X                       | Y         | Z         |
| 1                | 6                | 0              | 0.101234                | -0.500362 | 0.000012  |
| 2                | 6                | 0              | 0.779853                | 0.734710  | -0.000093 |
| 3                | 6                | 0              | -1.095645               | 2.095837  | 0.000004  |
| 4                | 6                | 0              | -1.835821               | 0.846477  | 0.000114  |
| 5                | 6                | 0              | -1.306958               | -0.446261 | 0.000124  |
| 6                | 6                | 0              | 2.188323                | -0.997902 | -0.000137 |
| 7                | 6                | 0              | -2.148162               | -1.699830 | 0.000242  |
| 8                | 1                | 0              | -1.940256               | -2.324755 | -0.880008 |
| 9                | 1                | 0              | -1.940122               | -2.324680 | 0.880514  |
| 10               | 1                | 0              | -3.216251               | -1.448816 | 0.000313  |
| 11               | 7                | 0              | 0.281965                | 1.972077  | -0.000102 |
| 12               | 7                | 0              | 2.129405                | 0.376809  | -0.000188 |
| 13               | 7                | 0              | 1.002261                | -1.567862 | -0.000018 |
| 14               | 1                | 0              | 2.897597                | 1.032856  | -0.000276 |
| 15               | 1                | 0              | 3.133186                | -1.529831 | -0.000192 |
| 16               | 1                | 0              | -2.926512               | 0.932055  | 0.000198  |

**N7-protonated amino N9H Q (Q-9) B3LYP/6-31+G(d)**

SCF Done: E(RB+HF-LYP) = -435.613036687 A.U.

Zero-point correction= 0.148154  
 (Hartree/Particle)  
 Thermal correction to Energy= 0.155887  
 Thermal correction to Enthalpy= 0.156831  
 Thermal correction to Gibbs Free Energy= 0.115710  
 Sum of electronic and zero-point Energies= -435.464882  
 Sum of electronic and thermal Energies= -435.457150  
 Sum of electronic and thermal Enthalpies= -435.456206  
 Sum of electronic and thermal Free Energies= -435.497327

|       | E (Thermal)<br>KCal/Mol | CV<br>Cal/Mol-Kelvin | S<br>Cal/Mol-Kelvin |
|-------|-------------------------|----------------------|---------------------|
| Total | 97.821                  | 30.650               | 86.548              |

| Center<br>Number | Atomic<br>Number | Atomic<br>Type | Coordinates (Angstroms) |           |           |
|------------------|------------------|----------------|-------------------------|-----------|-----------|
|                  |                  |                | X                       | Y         | Z         |
| 1                | 6                | 0              | 0.104041                | -0.474909 | -0.000018 |
| 2                | 6                | 0              | 0.745304                | 0.772367  | 0.000004  |
| 3                | 6                | 0              | -1.164210               | 1.905666  | 0.000002  |
| 4                | 6                | 0              | -1.910579               | 0.705161  | -0.000019 |
| 5                | 6                | 0              | -1.298845               | -0.550312 | -0.000035 |
| 6                | 6                | 0              | 2.312015                | -0.811557 | 0.000001  |

|    |   |   |           |           |           |
|----|---|---|-----------|-----------|-----------|
| 7  | 6 | 0 | -2.053448 | -1.850604 | 0.000027  |
| 8  | 1 | 0 | -1.813923 | -2.451233 | -0.886780 |
| 9  | 1 | 0 | -1.814372 | -2.450859 | 0.887213  |
| 10 | 1 | 0 | -3.131674 | -1.675091 | -0.000279 |
| 11 | 7 | 0 | 0.171835  | 1.963578  | 0.000012  |
| 12 | 7 | 0 | 2.118117  | 0.508630  | 0.000003  |
| 13 | 7 | 0 | 1.124245  | -1.429415 | -0.000019 |
| 14 | 1 | 0 | 2.847580  | 1.216270  | 0.000049  |
| 15 | 1 | 0 | 3.273056  | -1.306378 | 0.000021  |
| 16 | 1 | 0 | -2.994509 | 0.769179  | -0.000025 |
| 17 | 1 | 0 | -1.681024 | 2.861126  | 0.000038  |
| 18 | 1 | 0 | 1.009816  | -2.437446 | 0.000021  |

**N7-protonated amino N9H Q (Q-9) B3LYP/6-31+G(d) cpcm in water, RADII=UAKS**

Total free energy in solution:  
with all non electrostatic terms (a.u.) = -419.672183

---

|                            |              |        |
|----------------------------|--------------|--------|
| (Polarized solute)-Solvent | (kcal/mol) = | -64.44 |
| Cavitation energy          | (kcal/mol) = | 18.16  |
| Dispersion energy          | (kcal/mol) = | -21.40 |
| Repulsion energy           | (kcal/mol) = | 4.62   |
| Total non electrostatic    | (kcal/mol) = | 1.38   |

**N3-protonated amino N9H Q (Q-10) B3LYP/6-31+G(d)**

SCF Done: E(RB+HF-LYP) = -435.610389303 A.U.

|                                              |             |
|----------------------------------------------|-------------|
| Zero-point correction=                       | 0.147625    |
| (Hartree/Particle)                           |             |
| Thermal correction to Energy=                | 0.155598    |
| Thermal correction to Enthalpy=              | 0.156542    |
| Thermal correction to Gibbs Free Energy=     | 0.114077    |
| Sum of electronic and zero-point Energies=   | -435.462764 |
| Sum of electronic and thermal Energies=      | -435.454792 |
| Sum of electronic and thermal Enthalpies=    | -435.453847 |
| Sum of electronic and thermal Free Energies= | -435.496312 |

|       | E (Thermal) | CV             | S              |
|-------|-------------|----------------|----------------|
|       | KCal/Mol    | Cal/Mol-Kelvin | Cal/Mol-Kelvin |
| Total | 97.639      | 31.057         | 89.374         |

| Center Number | Atomic Number | Atomic Type | Coordinates (Angstroms) |           |           |
|---------------|---------------|-------------|-------------------------|-----------|-----------|
|               |               |             | X                       | Y         | Z         |
| 1             | 6             | 0           | 0.149522                | -0.535027 | -0.000010 |
| 2             | 6             | 0           | 0.808475                | 0.713570  | 0.000000  |
| 3             | 6             | 0           | -1.234351               | 1.850259  | 0.000008  |
| 4             | 6             | 0           | -1.918787               | 0.648430  | -0.000005 |
| 5             | 6             | 0           | -1.252083               | -0.598125 | -0.000034 |
| 6             | 6             | 0           | 2.245293                | -0.946106 | 0.000000  |
| 7             | 6             | 0           | -1.978490               | -1.904929 | -0.000002 |
| 8             | 1             | 0           | -1.692664               | -2.498416 | -0.876825 |

|    |   |   |           |           |           |
|----|---|---|-----------|-----------|-----------|
| 9  | 1 | 0 | -1.694311 | -2.497356 | 0.878097  |
| 10 | 1 | 0 | -3.061586 | -1.765636 | -0.001036 |
| 11 | 7 | 0 | 0.129150  | 1.881103  | 0.000004  |
| 12 | 7 | 0 | 2.141686  | 0.445560  | 0.000010  |
| 13 | 7 | 0 | 1.089968  | -1.548052 | -0.000007 |
| 14 | 1 | 0 | 2.915712  | 1.100217  | 0.000024  |
| 15 | 1 | 0 | 3.213596  | -1.430224 | -0.000018 |
| 16 | 1 | 0 | -3.003019 | 0.680892  | -0.000031 |
| 17 | 1 | 0 | -1.729057 | 2.814010  | 0.000022  |
| 18 | 1 | 0 | 0.608231  | 2.777810  | -0.000030 |

**N9-protonated amino N9H Q (Q-11) B3LYP/6-31+G(d)**

SCF Done: E(RB+HF-LYP) = -435.549286102 A.U.

Zero-point correction= 0.146696  
(Hartree/Particle)  
Thermal correction to Energy= 0.154714  
Thermal correction to Enthalpy= 0.155658  
Thermal correction to Gibbs Free Energy= 0.113430  
Sum of electronic and zero-point Energies= -435.402590  
Sum of electronic and thermal Energies= -435.394572  
Sum of electronic and thermal Enthalpies= -435.393628  
Sum of electronic and thermal Free Energies= -435.435856

|       | E (Thermal) | CV             | S              |
|-------|-------------|----------------|----------------|
|       | KCal/Mol    | Cal/Mol-Kelvin | Cal/Mol-Kelvin |
| Total | 97.084      | 31.064         | 88.876         |

| Center<br>Number | Atomic<br>Number | Atomic<br>Type | Coordinates (Angstroms) |           |           |
|------------------|------------------|----------------|-------------------------|-----------|-----------|
|                  |                  |                | X                       | Y         | Z         |
| 1                | 6                | 0              | -0.093277               | -0.503188 | -0.001504 |
| 2                | 6                | 0              | -0.711741               | 0.744004  | 0.001798  |
| 3                | 6                | 0              | 1.170957                | 1.901990  | -0.000431 |
| 4                | 6                | 0              | 1.916370                | 0.719394  | -0.004327 |
| 5                | 6                | 0              | 1.304964                | -0.552808 | -0.004082 |
| 6                | 6                | 0              | -2.205787               | -1.047717 | -0.001745 |
| 7                | 6                | 0              | 2.085670                | -1.834402 | 0.003492  |
| 8                | 1                | 0              | 2.602958                | -1.955265 | 0.963554  |
| 9                | 1                | 0              | 1.440172                | -2.701966 | -0.148107 |
| 10               | 1                | 0              | 2.852796                | -1.822557 | -0.778281 |
| 11               | 7                | 0              | -0.185390               | 1.932342  | 0.002805  |
| 12               | 7                | 0              | -2.182553               | 0.481030  | 0.002514  |
| 13               | 7                | 0              | -1.045492               | -1.550068 | -0.004166 |
| 14               | 1                | 0              | -2.650843               | 0.882095  | -0.824139 |
| 15               | 1                | 0              | -3.168558               | -1.545037 | -0.002939 |
| 16               | 1                | 0              | 3.000452                | 0.788952  | -0.008703 |
| 17               | 1                | 0              | 1.663342                | 2.869264  | -0.000853 |
| 18               | 1                | 0              | -2.649208               | 0.877754  | 0.832178  |

**CH3-deprotonated amino N7H Q (Q-12) B3LYP/6-31+G(d)**

SCF Done: E(RB3LYP) = -434.645238353

Zero-point correction= 0.119106  
 (Hartree/Particle)  
 Thermal correction to Energy= 0.126703  
 Thermal correction to Enthalpy= 0.127647  
 Thermal correction to Gibbs Free Energy= 0.087211  
 Sum of electronic and zero-point Energies= -434.526132  
 Sum of electronic and thermal Energies= -434.518536  
 Sum of electronic and thermal Enthalpies= -434.517592  
 Sum of electronic and thermal Free Energies= -434.558027

|       | E (Thermal)<br>KCal/Mol | CV<br>Cal/Mol-Kelvin | S<br>Cal/Mol-Kelvin |
|-------|-------------------------|----------------------|---------------------|
| Total | 79.507                  | 30.688               | 85.103              |

| Center<br>Number | Atomic<br>Number | Atomic<br>Type | Coordinates (Angstroms) |           |           |
|------------------|------------------|----------------|-------------------------|-----------|-----------|
|                  |                  |                | X                       | Y         | Z         |
| 1                | 6                | 0              | -0.160510               | 0.464195  | -0.000344 |
| 2                | 6                | 0              | -0.696751               | -0.833779 | 0.000057  |
| 3                | 6                | 0              | 1.360866                | -1.718309 | -0.000065 |
| 4                | 6                | 0              | 1.984774                | -0.470430 | -0.000300 |
| 5                | 6                | 0              | 1.243589                | 0.770434  | -0.000097 |
| 6                | 6                | 0              | -2.377115               | 0.514107  | 0.000063  |
| 7                | 6                | 0              | 1.773228                | 2.052420  | 0.000401  |
| 8                | 7                | 0              | 0.035411                | -1.975829 | 0.000212  |
| 9                | 7                | 0              | -2.092078               | -0.770251 | 0.000359  |
| 10               | 7                | 0              | -1.260729               | 1.311078  | -0.000413 |
| 11               | 1                | 0              | 1.141062                | 2.938525  | 0.000849  |
| 12               | 1                | 0              | 2.847981                | 2.216752  | 0.000963  |
| 13               | 1                | 0              | 3.073798                | -0.429552 | -0.000508 |
| 14               | 1                | 0              | 2.000338                | -2.605639 | -0.000078 |
| 15               | 1                | 0              | -3.376897               | 0.933413  | -0.000072 |
| 16               | 1                | 0              | -1.232996               | 2.319678  | -0.000555 |

**C8-deprotonated amino N7H Q (Q-13) B3LYP/6-31+G(d)**

SCF Done: E(RB3LYP) = -434.628281387

Zero-point correction= 0.119370  
 (Hartree/Particle)  
 Thermal correction to Energy= 0.127133  
 Thermal correction to Enthalpy= 0.128077  
 Thermal correction to Gibbs Free Energy= 0.086950  
 Sum of electronic and zero-point Energies= -434.508912  
 Sum of electronic and thermal Energies= -434.501148  
 Sum of electronic and thermal Enthalpies= -434.500204  
 Sum of electronic and thermal Free Energies= -434.541332

|       | E (Thermal)<br>KCal/Mol | CV<br>Cal/Mol-Kelvin | S<br>Cal/Mol-Kelvin |
|-------|-------------------------|----------------------|---------------------|
| Total | 79.777                  | 30.100               | 86.560              |

| Center Number | Atomic Number | Atomic Type | Coordinates (Angstroms) |           |           |
|---------------|---------------|-------------|-------------------------|-----------|-----------|
|               |               |             | X                       | Y         | Z         |
| 1             | 6             | 0           | 0.160596                | -0.499978 | -0.000193 |
| 2             | 6             | 0           | 0.902824                | 0.728776  | -0.000016 |
| 3             | 6             | 0           | -1.034676               | 1.922076  | 0.000043  |
| 4             | 6             | 0           | -1.830677               | 0.765273  | -0.000011 |
| 5             | 6             | 0           | -1.230292               | -0.508774 | 0.000009  |
| 6             | 6             | 0           | 2.446188                | -0.873041 | 0.000024  |
| 7             | 6             | 0           | -2.035049               | -1.786923 | 0.000010  |
| 8             | 7             | 0           | 0.306846                | 1.936555  | -0.000043 |
| 9             | 7             | 0           | 2.251146                | 0.468476  | -0.000001 |
| 10            | 7             | 0           | 1.142839                | -1.461741 | 0.000246  |
| 11            | 1             | 0           | -1.814908               | -2.404084 | 0.883550  |
| 12            | 1             | 0           | -1.814040               | -2.404625 | -0.882917 |
| 13            | 1             | 0           | -3.112001               | -1.577556 | -0.000584 |
| 14            | 1             | 0           | 0.998529                | -2.460268 | -0.000888 |
| 15            | 1             | 0           | -2.916369               | 0.858930  | 0.000172  |
| 16            | 1             | 0           | -1.520512               | 2.900118  | 0.000073  |

**C1-deprotonated amino N7H Q (Q-14) B3LYP/6-31+G(d)**

SCF Done: E(RB3LYP) = -434.606067732

Zero-point correction= 0.119255

(Hartree/Particle)

Thermal correction to Energy= 0.127123

Thermal correction to Enthalpy= 0.128067

Thermal correction to Gibbs Free Energy= 0.086711

Sum of electronic and zero-point Energies= -434.486813

Sum of electronic and thermal Energies= -434.478945

Sum of electronic and thermal Enthalpies= -434.478001

Sum of electronic and thermal Free Energies= -434.519357

|       | E (Thermal)<br>KCal/Mol | CV<br>Cal/Mol-Kelvin | S<br>Cal/Mol-Kelvin |
|-------|-------------------------|----------------------|---------------------|
| Total | 79.771                  | 30.158               | 87.042              |

| Center Number | Atomic Number | Atomic Type | Coordinates (Angstroms) |           |           |
|---------------|---------------|-------------|-------------------------|-----------|-----------|
|               |               |             | X                       | Y         | Z         |
| 1             | 6             | 0           | -0.094496               | -0.440510 | -0.000038 |
| 2             | 6             | 0           | -0.789269               | 0.788963  | 0.000007  |
| 3             | 6             | 0           | 1.182765                | 1.884133  | -0.000008 |
| 4             | 6             | 0           | 2.020557                | 0.722159  | -0.000018 |
| 5             | 6             | 0           | 1.311055                | -0.493297 | -0.000011 |
| 6             | 6             | 0           | -2.306926               | -0.730214 | 0.000066  |
| 7             | 1             | 0           | 1.666085                | 2.866510  | -0.000090 |
| 8             | 1             | 0           | -3.253805               | -1.258947 | 0.000052  |
| 9             | 6             | 0           | 2.015183                | -1.837384 | 0.000049  |
| 10            | 7             | 0           | -0.164759               | 1.975978  | 0.000045  |
| 11            | 7             | 0           | -2.171509               | 0.573403  | 0.000068  |
| 12            | 7             | 0           | -1.104552               | -1.407576 | -0.000337 |



|    |   |   |           |           |           |
|----|---|---|-----------|-----------|-----------|
| 13 | 1 | 0 | 1.761059  | -2.444927 | -0.886404 |
| 14 | 1 | 0 | 1.761930  | -2.444322 | 0.887156  |
| 15 | 1 | 0 | 3.096774  | -1.665473 | -0.000504 |
| 16 | 1 | 0 | -0.979512 | -2.408577 | 0.001078  |

**C2-deprotonated amino N7H Q (Q-15) B3LYP/6-31+G(d)**

SCF Done: E(RB3LYP) = -434.585634271

Zero-point correction= 0.118125  
(Hartree/Particle)  
Thermal correction to Energy= 0.126274  
Thermal correction to Enthalpy= 0.127218  
Thermal correction to Gibbs Free Energy= 0.085327  
Sum of electronic and zero-point Energies= -434.467510  
Sum of electronic and thermal Energies= -434.459360  
Sum of electronic and thermal Enthalpies= -434.458416  
Sum of electronic and thermal Free Energies= -434.500308

|       | E (Thermal)<br>KCal/Mol | CV<br>Cal/Mol-Kelvin | S<br>Cal/Mol-Kelvin |
|-------|-------------------------|----------------------|---------------------|
| Total | 79.238                  | 30.879               | 88.168              |

| Center<br>Number | Atomic<br>Number | Atomic<br>Type | Coordinates (Angstroms) |           |           |
|------------------|------------------|----------------|-------------------------|-----------|-----------|
|                  |                  |                | X                       | Y         | Z         |
| 1                | 6                | 0              | -0.111203               | -0.443068 | -0.000150 |
| 2                | 6                | 0              | -0.806719               | 0.786648  | 0.000015  |
| 3                | 6                | 0              | 1.150985                | 2.074998  | -0.000087 |
| 4                | 6                | 0              | 1.859934                | 0.809652  | -0.000330 |
| 5                | 6                | 0              | 1.288497                | -0.465569 | -0.000060 |
| 6                | 6                | 0              | -2.306490               | -0.767324 | -0.000205 |
| 7                | 1                | 0              | -3.243167               | -1.314886 | -0.000269 |
| 8                | 6                | 0              | 2.081269                | -1.753206 | 0.000246  |
| 9                | 7                | 0              | -0.224425               | 1.997725  | 0.000273  |
| 10               | 7                | 0              | -2.191263               | 0.536006  | -0.000036 |
| 11               | 7                | 0              | -1.095520               | -1.430621 | 0.000843  |
| 12               | 1                | 0              | 1.867890                | -2.373792 | -0.885229 |
| 13               | 1                | 0              | 1.867151                | -2.373706 | 0.885581  |
| 14               | 1                | 0              | 3.156958                | -1.539670 | 0.000615  |
| 15               | 1                | 0              | -0.961286               | -2.430953 | -0.004241 |
| 16               | 1                | 0              | 2.953263                | 0.858448  | -0.000590 |

**N3-protonated amino N7H Q (Q-16) B3LYP/6-31+G(d)**

SCF Done: E(RB3LYP) = -435.621210671

Zero-point correction= 0.148363  
(Hartree/Particle)  
Thermal correction to Energy= 0.156123  
Thermal correction to Enthalpy= 0.157067  
Thermal correction to Gibbs Free Energy= 0.115764

Sum of electronic and zero-point Energies= -435.472848  
 Sum of electronic and thermal Energies= -435.465088  
 Sum of electronic and thermal Enthalpies= -435.464143  
 Sum of electronic and thermal Free Energies= -435.505446

|       | E (Thermal)<br>KCal/Mol | CV<br>Cal/Mol-Kelvin | S<br>Cal/Mol-Kelvin |
|-------|-------------------------|----------------------|---------------------|
| Total | 97.969                  | 30.581               | 86.930              |

| Center<br>Number | Atomic<br>Number | Atomic<br>Type | Coordinates (Angstroms) |           |           |
|------------------|------------------|----------------|-------------------------|-----------|-----------|
|                  |                  |                | X                       | Y         | Z         |
| 1                | 6                | 0              | 0.149709                | -0.510276 | 0.000017  |
| 2                | 6                | 0              | 0.830422                | 0.728249  | -0.000023 |
| 3                | 6                | 0              | -1.230040               | 1.852008  | -0.000036 |
| 4                | 6                | 0              | -1.912499               | 0.642567  | -0.000001 |
| 5                | 6                | 0              | -1.245089               | -0.600506 | 0.000025  |
| 6                | 6                | 0              | 2.353235                | -0.721423 | 0.000101  |
| 7                | 6                | 0              | -1.978679               | -1.909874 | 0.000038  |
| 8                | 1                | 0              | -1.718598               | -2.503973 | -0.885306 |
| 9                | 1                | 0              | -1.718553               | -2.503986 | 0.885360  |
| 10               | 1                | 0              | -3.060618               | -1.760817 | 0.000066  |
| 11               | 7                | 0              | 0.123212                | 1.882796  | -0.000051 |
| 12               | 7                | 0              | 2.176308                | 0.588708  | -0.000043 |
| 13               | 7                | 0              | 1.182686                | -1.430316 | -0.000020 |
| 14               | 1                | 0              | 3.319071                | -1.210375 | 0.000123  |
| 15               | 1                | 0              | -2.996786               | 0.668707  | -0.000005 |
| 16               | 1                | 0              | -1.734698               | 2.810712  | -0.000063 |
| 17               | 1                | 0              | 1.103465                | -2.440263 | -0.000012 |
| 18               | 1                | 0              | 0.628912                | 2.767212  | -0.000085 |

**N7-protonated amino N7H Q (Q-17) B3LYP/6-31+G(d)**

SCF Done: E(RB3LYP) = -435.539104459  
 Zero-point correction= 0.146402  
 (Hartree/Particle)  
 Thermal correction to Energy= 0.154511  
 Thermal correction to Enthalpy= 0.155456  
 Thermal correction to Gibbs Free Energy= 0.112422  
 Sum of electronic and zero-point Energies= -435.392703  
 Sum of electronic and thermal Energies= -435.384593  
 Sum of electronic and thermal Enthalpies= -435.383649  
 Sum of electronic and thermal Free Energies= -435.426683

|       | E (Thermal)<br>KCal/Mol | CV<br>Cal/Mol-Kelvin | S<br>Cal/Mol-Kelvin |
|-------|-------------------------|----------------------|---------------------|
| Total | 96.957                  | 31.168               | 90.573              |

| Center<br>Number | Atomic<br>Number | Atomic<br>Type | Coordinates (Angstroms) |   |   |
|------------------|------------------|----------------|-------------------------|---|---|
|                  |                  |                | X                       | Y | Z |

|    |   |   |           |           |           |
|----|---|---|-----------|-----------|-----------|
| 1  | 6 | 0 | -0.118964 | -0.422942 | -0.001575 |
| 2  | 6 | 0 | -0.733004 | 0.833088  | 0.001105  |
| 3  | 6 | 0 | 1.253306  | 1.866359  | 0.000139  |
| 4  | 6 | 0 | 1.944347  | 0.646285  | -0.003365 |
| 5  | 6 | 0 | 1.260560  | -0.585022 | -0.003573 |
| 6  | 6 | 0 | -2.455122 | -0.503977 | 0.000108  |
| 7  | 6 | 0 | 1.959823  | -1.917985 | 0.003555  |
| 8  | 7 | 0 | -0.087028 | 1.979863  | 0.002164  |
| 9  | 7 | 0 | -2.152989 | 0.715597  | 0.001822  |
| 10 | 7 | 0 | -1.204705 | -1.422047 | -0.002379 |
| 11 | 1 | 0 | 1.600792  | -2.571532 | -0.801285 |
| 12 | 1 | 0 | 1.806504  | -2.442018 | 0.956094  |
| 13 | 1 | 0 | 3.036705  | -1.792918 | -0.130580 |
| 14 | 1 | 0 | -1.202857 | -2.036781 | 0.825295  |
| 15 | 1 | 0 | 3.030242  | 0.652443  | -0.006863 |
| 16 | 1 | 0 | 1.806274  | 2.801522  | 0.000182  |
| 17 | 1 | 0 | -3.426067 | -0.985657 | -0.000103 |
| 18 | 1 | 0 | -1.204211 | -2.033783 | -0.832360 |

-----

**C8-deprotonated amino N3H Q (Q-18) B3LYP/6-31+G(d)**

SCF Done: E(RB3LYP) = -434.583520511

Zero-point correction= 0.118365  
(Hartree/Particle)

Thermal correction to Energy= 0.126451

Thermal correction to Enthalpy= 0.127395

Thermal correction to Gibbs Free Energy= 0.085201

Sum of electronic and zero-point Energies= -434.465156

Sum of electronic and thermal Energies= -434.457070

Sum of electronic and thermal Enthalpies= -434.456125

Sum of electronic and thermal Free Energies= -434.498320

|       | E (Thermal) | CV             | S              |
|-------|-------------|----------------|----------------|
|       | KCal/Mol    | Cal/Mol-Kelvin | Cal/Mol-Kelvin |
| Total | 79.349      | 30.935         | 88.805         |

-----

| Center<br>Number | Atomic<br>Number | Atomic<br>Type | Coordinates (Angstroms) |           |           |
|------------------|------------------|----------------|-------------------------|-----------|-----------|
|                  |                  |                | X                       | Y         | Z         |
| 1                | 6                | 0              | -0.180541               | -0.603818 | -0.000002 |
| 2                | 6                | 0              | -0.985663               | 0.619462  | 0.000005  |
| 3                | 6                | 0              | 1.022126                | 1.927070  | -0.000004 |
| 4                | 6                | 0              | 1.789426                | 0.783247  | -0.000019 |
| 5                | 6                | 0              | 1.204368                | -0.523417 | -0.000012 |
| 6                | 6                | 0              | -2.335541               | -1.113373 | -0.000017 |
| 7                | 6                | 0              | 2.064742                | -1.762452 | 0.000016  |
| 8                | 7                | 0              | -0.350726               | 1.834235  | 0.000020  |
| 9                | 7                | 0              | -2.264687               | 0.353010  | 0.000001  |
| 10               | 7                | 0              | -1.058947               | -1.643229 | 0.000000  |
| 11               | 1                | 0              | 1.426458                | -2.650650 | -0.000137 |
| 12               | 1                | 0              | 2.718590                | -1.803059 | -0.884663 |
| 13               | 1                | 0              | -0.927054               | 2.667964  | 0.000045  |

|    |   |   |          |           |           |
|----|---|---|----------|-----------|-----------|
| 14 | 1 | 0 | 2.718326 | -1.803196 | 0.884885  |
| 15 | 1 | 0 | 2.872678 | 0.891360  | -0.000051 |
| 16 | 1 | 0 | 1.438025 | 2.929149  | -0.000020 |

-----

**C1-deprotonated amino N3H Q (Q-19) B3LYP/6-31+G(d)**

SCF Done: E(RB3LYP) = -434.615508714

Zero-point correction= 0.120081  
(Hartree/Particle)

Thermal correction to Energy= 0.127833

Thermal correction to Enthalpy= 0.128778

Thermal correction to Gibbs Free Energy= 0.086915

Sum of electronic and zero-point Energies= -434.495427

Sum of electronic and thermal Energies= -434.487675

Sum of electronic and thermal Enthalpies= -434.486731

Sum of electronic and thermal Free Energies= -434.528593

|       | E (Thermal) | CV             | S              |
|-------|-------------|----------------|----------------|
|       | KCal/Mol    | Cal/Mol-Kelvin | Cal/Mol-Kelvin |
| Total | 80.217      | 29.417         | 88.107         |

-----

| Center<br>Number | Atomic<br>Number | Atomic<br>Type | Coordinates (Angstroms) |           |           |
|------------------|------------------|----------------|-------------------------|-----------|-----------|
|                  |                  |                | X                       | Y         | Z         |
| 1                | 6                | 0              | 0.132268                | -0.538352 | -0.000362 |
| 2                | 6                | 0              | 0.859260                | 0.689954  | 0.000004  |
| 3                | 6                | 0              | -1.211284               | 1.850860  | -0.000053 |
| 4                | 6                | 0              | -1.999535               | 0.711656  | -0.000224 |
| 5                | 6                | 0              | -1.271483               | -0.521673 | -0.000256 |
| 6                | 6                | 0              | 2.231293                | -0.888906 | 0.000047  |
| 7                | 6                | 0              | -2.023512               | -1.834604 | 0.000365  |
| 8                | 7                | 0              | 0.179483                | 1.861096  | 0.000063  |
| 9                | 7                | 0              | 2.192556                | 0.480186  | 0.000244  |
| 10               | 7                | 0              | 1.075709                | -1.560338 | -0.000302 |
| 11               | 1                | 0              | -1.346550               | -2.696179 | -0.001366 |
| 12               | 1                | 0              | -2.678818               | -1.887802 | 0.880542  |
| 13               | 1                | 0              | -1.620926               | 2.864075  | -0.000170 |
| 14               | 1                | 0              | 3.188040                | -1.406055 | 0.000095  |
| 15               | 1                | 0              | 0.704196                | 2.732450  | 0.001048  |
| 16               | 1                | 0              | -2.682216               | -1.886711 | -0.877316 |

-----

**C2-deprotonated amino N3H Q (Q-20) B3LYP/6-31+G(d)**

SCF Done: E(RB3LYP) = -434.636680123

Zero-point correction= 0.121171  
(Hartree/Particle)

Thermal correction to Energy= 0.128654

Thermal correction to Enthalpy= 0.129598

Thermal correction to Gibbs Free Energy= 0.088833

Sum of electronic and zero-point Energies= -434.515509

Sum of electronic and thermal Energies= -434.508026  
 Sum of electronic and thermal Enthalpies= -434.507082  
 Sum of electronic and thermal Free Energies= -434.547847

|       | E (Thermal)<br>KCal/Mol | CV<br>Cal/Mol-Kelvin | S<br>Cal/Mol-Kelvin |
|-------|-------------------------|----------------------|---------------------|
| Total | 80.732                  | 28.833               | 85.798              |

| Center<br>Number | Atomic<br>Number | Atomic<br>Type | Coordinates (Angstroms) |           |           |
|------------------|------------------|----------------|-------------------------|-----------|-----------|
|                  |                  |                | X                       | Y         | Z         |
| 1                | 6                | 0              | 0.147222                | -0.533600 | -0.000142 |
| 2                | 6                | 0              | 0.873348                | 0.681729  | -0.000026 |
| 3                | 6                | 0              | -1.158469               | 2.040470  | 0.000040  |
| 4                | 6                | 0              | -1.845366               | 0.789813  | 0.000004  |
| 5                | 6                | 0              | -1.256594               | -0.487088 | -0.000138 |
| 6                | 6                | 0              | 2.230652                | -0.917990 | 0.000048  |
| 7                | 6                | 0              | -2.073808               | -1.755262 | 0.000040  |
| 8                | 7                | 0              | 0.206818                | 1.878534  | 0.000049  |
| 9                | 7                | 0              | 2.205651                | 0.448188  | 0.000034  |
| 10               | 7                | 0              | 1.059692                | -1.573418 | -0.000007 |
| 11               | 1                | 0              | -1.842803               | -2.371089 | 0.879531  |
| 12               | 1                | 0              | -3.148325               | -1.534088 | -0.000996 |
| 13               | 1                | 0              | 3.178172                | -1.451407 | 0.000099  |
| 14               | 1                | 0              | 0.783465                | 2.713647  | -0.000178 |
| 15               | 1                | 0              | -1.841180               | -2.372398 | -0.878045 |
| 16               | 1                | 0              | -2.936360               | 0.833771  | 0.000095  |

**CH3-deprotonated amino N3H Q (Q-21) B3LYP/6-31+G(d)**

SCF Done: E(RB3LYP) = -434.652557581  
 Zero-point correction= 0.119750  
 (Hartree/Particle)  
 Thermal correction to Energy= 0.127476  
 Thermal correction to Enthalpy= 0.128421  
 Thermal correction to Gibbs Free Energy= 0.087316  
 Sum of electronic and zero-point Energies= -434.532807  
 Sum of electronic and thermal Energies= -434.525081  
 Sum of electronic and thermal Enthalpies= -434.524137  
 Sum of electronic and thermal Free Energies= -434.565242

|       | E (Thermal)<br>KCal/Mol | CV<br>Cal/Mol-Kelvin | S<br>Cal/Mol-Kelvin |
|-------|-------------------------|----------------------|---------------------|
| Total | 79.993                  | 30.381               | 86.513              |

| Center<br>Number | Atomic<br>Number | Atomic<br>Type | Coordinates (Angstroms) |           |           |
|------------------|------------------|----------------|-------------------------|-----------|-----------|
|                  |                  |                | X                       | Y         | Z         |
| 1                | 6                | 0              | -0.227076               | -0.570854 | -0.004268 |
| 2                | 6                | 0              | -0.769131               | 0.721981  | -0.006436 |
| 3                | 6                | 0              | 1.395107                | 1.682414  | 0.007720  |

|    |   |   |           |           |           |
|----|---|---|-----------|-----------|-----------|
| 4  | 6 | 0 | 1.968775  | 0.442888  | 0.007085  |
| 5  | 6 | 0 | 1.205881  | -0.811196 | -0.001629 |
| 6  | 6 | 0 | -2.354304 | -0.648580 | 0.006699  |
| 7  | 6 | 0 | 1.812592  | -2.038577 | -0.003317 |
| 8  | 7 | 0 | 0.031999  | 1.859667  | -0.023588 |
| 9  | 7 | 0 | -2.120226 | 0.697611  | 0.000098  |
| 10 | 7 | 0 | -1.282761 | -1.457401 | 0.003461  |
| 11 | 1 | 0 | 1.224250  | -2.950359 | -0.007556 |
| 12 | 1 | 0 | 2.897832  | -2.128936 | 0.001174  |
| 13 | 1 | 0 | 3.055683  | 0.386474  | 0.014181  |
| 14 | 1 | 0 | 1.989352  | 2.592574  | 0.017134  |
| 15 | 1 | 0 | -3.368954 | -1.038339 | 0.014661  |
| 16 | 1 | 0 | -0.392309 | 2.770997  | 0.065494  |

-----

**N3-protonated amino N3H Q (Q-22) B3LYP/6-31+G(d)**

SCF Done: E(RB3LYP) = -435.512799314

Zero-point correction= 0.146496  
(Hartree/Particle)  
Thermal correction to Energy= 0.154632  
Thermal correction to Enthalpy= 0.155576  
Thermal correction to Gibbs Free Energy= 0.113506  
Sum of electronic and zero-point Energies= -435.366303  
Sum of electronic and thermal Energies= -435.358168  
Sum of electronic and thermal Enthalpies= -435.357224  
Sum of electronic and thermal Free Energies= -435.399293

|       | E (Thermal) | CV             | S              |
|-------|-------------|----------------|----------------|
|       | KCal/Mol    | Cal/Mol-Kelvin | Cal/Mol-Kelvin |
| Total | 97.033      | 31.273         | 88.542         |

-----

| Center<br>Number | Atomic<br>Number | Atomic<br>Type | Coordinates (Angstroms) |           |           |
|------------------|------------------|----------------|-------------------------|-----------|-----------|
|                  |                  |                | X                       | Y         | Z         |
| 1                | 6                | 0              | -0.192307               | -0.602496 | -0.001102 |
| 2                | 6                | 0              | -0.886659               | 0.662424  | -0.000445 |
| 3                | 6                | 0              | 1.314697                | 1.807190  | -0.000300 |
| 4                | 6                | 0              | 1.889344                | 0.595949  | -0.000883 |
| 5                | 6                | 0              | 1.171422                | -0.690263 | -0.000467 |
| 6                | 6                | 0              | -2.294915               | -0.885068 | -0.000044 |
| 7                | 6                | 0              | 1.931802                | -1.970182 | 0.001159  |
| 8                | 7                | 0              | -0.169431               | 1.944939  | 0.001040  |
| 9                | 7                | 0              | -2.165680               | 0.537862  | 0.000357  |
| 10               | 7                | 0              | -1.183186               | -1.572521 | -0.000447 |
| 11               | 1                | 0              | 1.259377                | -2.829239 | 0.001822  |
| 12               | 1                | 0              | 2.588019                | -2.024258 | -0.878848 |
| 13               | 1                | 0              | -0.468186               | 2.500487  | -0.817891 |
| 14               | 1                | 0              | 2.587131                | -2.022234 | 0.881902  |
| 15               | 1                | 0              | 2.976264                | 0.572440  | -0.002100 |
| 16               | 1                | 0              | 1.834497                | 2.757245  | -0.001072 |
| 17               | 1                | 0              | -3.282319               | -1.329482 | -0.000243 |
| 18               | 1                | 0              | -0.467010               | 2.497744  | 0.822265  |

-----

**M ("6-methylated" 1,3,7-deazaadenine): neutral, protonated and deprotonated species**

**Amino N9H M (M-1) B3LYP/6-31+G(d)**

SCF Done: E(RB+HF-LYP) = -403.150879504 A.U.

Zero-point correction= 0.157439  
(Hartree/Particle)  
Thermal correction to Energy= 0.165461  
Thermal correction to Enthalpy= 0.166405  
Thermal correction to Gibbs Free Energy= 0.125013  
Sum of electronic and zero-point Energies= -402.993440  
Sum of electronic and thermal Energies= -402.985419  
Sum of electronic and thermal Enthalpies= -402.984474  
Sum of electronic and thermal Free Energies= -403.025866

|       | E (Thermal)<br>KCal/Mol | CV<br>Cal/Mol-Kelvin | S<br>Cal/Mol-Kelvin |
|-------|-------------------------|----------------------|---------------------|
| Total | 103.828                 | 32.396               | 87.116              |

| Center<br>Number | Atomic<br>Number | Atomic<br>Type | Coordinates (Angstroms) |           |           |
|------------------|------------------|----------------|-------------------------|-----------|-----------|
|                  |                  |                | X                       | Y         | Z         |
| 1                | 6                | 0              | -0.152635               | -0.507383 | -0.000022 |
| 2                | 6                | 0              | -0.781740               | 0.768239  | -0.000069 |
| 3                | 6                | 0              | -0.055449               | 1.966292  | 0.000021  |
| 4                | 6                | 0              | 1.330668                | 1.863290  | 0.000159  |
| 5                | 6                | 0              | 1.973195                | 0.605001  | 0.000207  |
| 6                | 6                | 0              | 1.259569                | -0.591644 | 0.000119  |
| 7                | 6                | 0              | -1.203276               | -1.490891 | -0.000142 |
| 8                | 6                | 0              | -2.395295               | -0.809919 | -0.000253 |
| 9                | 1                | 0              | -0.550434               | 2.934401  | -0.000016 |
| 10               | 1                | 0              | 1.934729                | 2.766998  | 0.000232  |
| 11               | 1                | 0              | 3.060611                | 0.571294  | 0.000314  |
| 12               | 1                | 0              | -1.092967               | -2.566852 | -0.000146 |
| 13               | 1                | 0              | -3.411191               | -1.181185 | -0.000361 |
| 14               | 6                | 0              | 1.950143                | -1.932893 | 0.000172  |
| 15               | 1                | 0              | 1.674322                | -2.525755 | 0.882710  |
| 16               | 1                | 0              | 1.674497                | -2.525735 | -0.882433 |
| 17               | 1                | 0              | 3.039174                | -1.818463 | 0.000282  |
| 18               | 7                | 0              | -2.146708               | 0.550543  | -0.000209 |
| 19               | 1                | 0              | -2.852863               | 1.270936  | -0.000270 |

**Amino C7H M (M-2) B3LYP/6-31+G(d)**

SCF Done: E(RB+HF-LYP) = -403.137864824 A.U.

Zero-point correction= 0.156435  
(Hartree/Particle)  
Thermal correction to Energy= 0.164455  
Thermal correction to Enthalpy= 0.165399  
Thermal correction to Gibbs Free Energy= 0.123688

Sum of electronic and zero-point Energies= -402.981430  
 Sum of electronic and thermal Energies= -402.973410  
 Sum of electronic and thermal Enthalpies= -402.972466  
 Sum of electronic and thermal Free Energies= -403.014177

|       | E (Thermal)<br>KCal/Mol | CV<br>Cal/Mol-Kelvin | S<br>Cal/Mol-Kelvin |
|-------|-------------------------|----------------------|---------------------|
| Total | 103.197                 | 31.722               | 87.788              |

| Center<br>Number | Atomic<br>Number | Atomic<br>Type | Coordinates (Angstroms) |           |           |
|------------------|------------------|----------------|-------------------------|-----------|-----------|
|                  |                  |                | X                       | Y         | Z         |
| 1                | 6                | 0              | -0.167792               | -0.462259 | 0.000051  |
| 2                | 6                | 0              | -0.755159               | 0.816321  | -0.000020 |
| 3                | 6                | 0              | 0.015487                | 1.976409  | -0.000168 |
| 4                | 6                | 0              | 1.405782                | 1.822857  | -0.000243 |
| 5                | 6                | 0              | 1.992274                | 0.550198  | -0.000172 |
| 6                | 6                | 0              | 1.218414                | -0.624857 | -0.000024 |
| 7                | 6                | 0              | -1.303989               | -1.452483 | 0.000205  |
| 8                | 6                | 0              | -2.485539               | -0.503846 | 0.000200  |
| 9                | 6                | 0              | 1.856704                | -1.993845 | 0.000048  |
| 10               | 1                | 0              | 1.559500                | -2.575976 | 0.882536  |
| 11               | 1                | 0              | 1.559395                | -2.576117 | -0.882311 |
| 12               | 1                | 0              | 2.949305                | -1.923717 | -0.000023 |
| 13               | 7                | 0              | -2.176404               | 0.747377  | 0.000075  |
| 14               | 1                | 0              | -3.524737               | -0.826442 | 0.000292  |
| 15               | 1                | 0              | -1.316996               | -2.112057 | -0.880497 |
| 16               | 1                | 0              | 3.076955                | 0.465759  | -0.000233 |
| 17               | 1                | 0              | 2.045008                | 2.702206  | -0.000358 |
| 18               | 1                | 0              | -0.453804               | 2.955641  | -0.000222 |
| 19               | 1                | 0              | -1.316886               | -2.111912 | 0.881017  |

**C8-deprotonated amino N9H M (M-3) B3LYP/6-31+G(d)**

SCF Done: E(RB+HF-LYP) = -402.526292465 A.U.

Zero-point correction= 0.143010  
 (Hartree/Particle)  
 Thermal correction to Energy= 0.150927  
 Thermal correction to Enthalpy= 0.151871  
 Thermal correction to Gibbs Free Energy= 0.110708  
 Sum of electronic and zero-point Energies= -402.383282  
 Sum of electronic and thermal Energies= -402.375366  
 Sum of electronic and thermal Enthalpies= -402.374422  
 Sum of electronic and thermal Free Energies= -402.415585

|       | E (Thermal)<br>KCal/Mol | CV<br>Cal/Mol-Kelvin | S<br>Cal/Mol-Kelvin |
|-------|-------------------------|----------------------|---------------------|
| Total | 94.708                  | 31.903               | 86.635              |

| Center<br>Number | Atomic<br>Number | Atomic<br>Type | Coordinates (Angstroms) |           |          |
|------------------|------------------|----------------|-------------------------|-----------|----------|
|                  |                  |                | X                       | Y         | Z        |
| 1                | 6                | 0              | -0.179967               | -0.539729 | 0.000211 |
| 2                | 6                | 0              | -0.853947               | 0.725779  | 0.000263 |



|    |   |   |           |           |           |
|----|---|---|-----------|-----------|-----------|
| 3  | 6 | 0 | -0.163685 | 1.940492  | 0.000287  |
| 4  | 6 | 0 | 1.236933  | 1.904200  | -0.000250 |
| 5  | 6 | 0 | 1.918881  | 0.668526  | -0.000354 |
| 6  | 6 | 0 | 1.235515  | -0.553683 | 0.000020  |
| 7  | 6 | 0 | -1.212825 | -1.535097 | -0.000156 |
| 8  | 6 | 0 | -2.496473 | -0.949874 | -0.000321 |
| 9  | 1 | 0 | -0.695624 | 2.892648  | 0.000519  |
| 10 | 1 | 0 | 1.805041  | 2.833731  | -0.000309 |
| 11 | 1 | 0 | 3.010109  | 0.665299  | -0.000521 |
| 12 | 1 | 0 | -1.039649 | -2.608073 | -0.000416 |
| 13 | 6 | 0 | 1.977416  | -1.869181 | 0.000229  |
| 14 | 1 | 0 | 1.719887  | -2.476053 | 0.881327  |
| 15 | 1 | 0 | 1.718627  | -2.476984 | -0.879842 |
| 16 | 1 | 0 | 3.065194  | -1.717832 | -0.000609 |
| 17 | 7 | 0 | -2.204101 | 0.429195  | 0.000004  |
| 18 | 1 | 0 | -2.925964 | 1.134291  | 0.000244  |

**C1-deprotonated amino N9H M (M-4) B3LYP/6-31+G(d)**

SCF Done: E(RB+HF-LYP) = -402.495523772 A.U.

Zero-point correction= 0.141317  
(Hartree/Particle)  
Thermal correction to Energy= 0.149816  
Thermal correction to Enthalpy= 0.150760  
Thermal correction to Gibbs Free Energy= 0.108119  
Sum of electronic and zero-point Energies= -402.354207  
Sum of electronic and thermal Energies= -402.345708  
Sum of electronic and thermal Enthalpies= -402.344764  
Sum of electronic and thermal Free Energies= -402.387405

|       | E (Thermal)<br>KCal/Mol | CV<br>Cal/Mol-Kelvin | S<br>Cal/Mol-Kelvin |
|-------|-------------------------|----------------------|---------------------|
| Total | 94.011                  | 32.959               | 89.745              |

| Center<br>Number | Atomic<br>Number | Atomic<br>Type | Coordinates (Angstroms) |           |           |
|------------------|------------------|----------------|-------------------------|-----------|-----------|
|                  |                  |                | X                       | Y         | Z         |
| 1                | 6                | 0              | -0.101534               | -0.488633 | -0.000022 |
| 2                | 6                | 0              | -0.757503               | 0.769122  | 0.000051  |
| 3                | 6                | 0              | -0.034105               | 1.968278  | 0.000029  |
| 4                | 6                | 0              | 1.363908                | 1.857949  | -0.000049 |
| 5                | 6                | 0              | 2.108956                | 0.635999  | -0.000034 |
| 6                | 6                | 0              | 1.324047                | -0.532941 | -0.000008 |
| 7                | 6                | 0              | -1.146395               | -1.490669 | -0.000093 |
| 8                | 6                | 0              | -2.358311               | -0.837535 | -0.000042 |
| 9                | 1                | 0              | -0.540296               | 2.938656  | 0.000011  |
| 10               | 1                | 0              | 1.916275                | 2.805354  | -0.000094 |
| 11               | 6                | 0              | 1.982568                | -1.903089 | 0.000040  |
| 12               | 1                | 0              | 1.703288                | -2.502445 | 0.884588  |
| 13               | 1                | 0              | 1.702764                | -2.502748 | -0.884118 |
| 14               | 1                | 0              | 3.069861                | -1.772451 | -0.000263 |
| 15               | 7                | 0              | -2.130510               | 0.530339  | 0.000210  |
| 16               | 1                | 0              | -2.843571               | 1.242507  | -0.000724 |
| 17               | 1                | 0              | -3.369755               | -1.226048 | -0.000045 |

18 1 0 -1.014786 -2.566083 -0.000064

**C2-deprotonated amino N9H M (M-5) B3LYP/6-31+G(d)**

SCF Done: E(RB+HF-LYP) = -402.497547408 A.U.

Zero-point correction= 0.141761  
(Hartree/Particle)  
Thermal correction to Energy= 0.150062  
Thermal correction to Enthalpy= 0.151006  
Thermal correction to Gibbs Free Energy= 0.109051  
Sum of electronic and zero-point Energies= -402.355787  
Sum of electronic and thermal Energies= -402.347486  
Sum of electronic and thermal Enthalpies= -402.346542  
Sum of electronic and thermal Free Energies= -402.388497

|       | E (Thermal)<br>KCal/Mol | CV<br>Cal/Mol-Kelvin | S<br>Cal/Mol-Kelvin |
|-------|-------------------------|----------------------|---------------------|
| Total | 94.165                  | 32.707               | 88.302              |

| Center<br>Number | Atomic<br>Number | Atomic<br>Type | Coordinates (Angstroms) |           |           |
|------------------|------------------|----------------|-------------------------|-----------|-----------|
|                  |                  |                | X                       | Y         | Z         |
| 1                | 6                | 0              | -0.110553               | -0.495251 | 0.000049  |
| 2                | 6                | 0              | -0.781375               | 0.755226  | -0.000045 |
| 3                | 6                | 0              | -0.097687               | 1.987584  | -0.000181 |
| 4                | 6                | 0              | 1.308158                | 2.052569  | -0.000230 |
| 5                | 6                | 0              | 1.940366                | 0.760407  | -0.000131 |
| 6                | 6                | 0              | 1.306186                | -0.487249 | 0.000003  |
| 7                | 6                | 0              | -1.122031               | -1.523896 | 0.000176  |
| 8                | 6                | 0              | -2.349303               | -0.897174 | 0.000159  |
| 9                | 1                | 0              | -0.700812               | 2.906335  | -0.000248 |
| 10               | 6                | 0              | 2.078375                | -1.787876 | 0.000096  |
| 11               | 1                | 0              | 1.850073                | -2.406588 | 0.883165  |
| 12               | 1                | 0              | 1.850019                | -2.406746 | -0.882848 |
| 13               | 1                | 0              | 3.159283                | -1.595243 | 0.000046  |
| 14               | 7                | 0              | -2.148171               | 0.474917  | 0.000025  |
| 15               | 1                | 0              | -2.875060               | 1.173267  | -0.000012 |
| 16               | 1                | 0              | -3.349916               | -1.312219 | 0.000230  |
| 17               | 1                | 0              | -0.967350               | -2.596824 | 0.000270  |
| 18               | 1                | 0              | 3.038152                | 0.727563  | -0.000161 |

**C3-deprotonated amino N9H M (M-6) B3LYP/6-31+G(d)**

SCF Done: E(RB+HF-LYP) = -402.512883933 A.U.

Zero-point correction= 0.142611  
(Hartree/Particle)  
Thermal correction to Energy= 0.150592  
Thermal correction to Enthalpy= 0.151536  
Thermal correction to Gibbs Free Energy= 0.110239  
Sum of electronic and zero-point Energies= -402.370273  
Sum of electronic and thermal Energies= -402.362292  
Sum of electronic and thermal Enthalpies= -402.361348

Sum of electronic and thermal Free Energies= -402.402645

|       | E (Thermal)<br>KCal/Mol | CV<br>Cal/Mol-Kelvin | S<br>Cal/Mol-Kelvin |
|-------|-------------------------|----------------------|---------------------|
| Total | 94.498                  | 32.033               | 86.917              |

| Center<br>Number | Atomic<br>Number | Atomic<br>Type | Coordinates (Angstroms) |           |           |
|------------------|------------------|----------------|-------------------------|-----------|-----------|
|                  |                  |                | X                       | Y         | Z         |
| 1                | 6                | 0              | -0.148896               | -0.486689 | -0.000168 |
| 2                | 6                | 0              | -0.759083               | 0.806643  | -0.000012 |
| 3                | 6                | 0              | -0.138933               | 2.073659  | 0.000064  |
| 4                | 6                | 0              | 1.259362                | 1.913511  | 0.000170  |
| 5                | 6                | 0              | 1.941070                | 0.660332  | -0.000184 |
| 6                | 6                | 0              | 1.266522                | -0.558641 | -0.000244 |
| 7                | 6                | 0              | -1.202059               | -1.468744 | -0.000048 |
| 8                | 6                | 0              | -2.399683               | -0.776028 | 0.000038  |
| 9                | 6                | 0              | 1.983272                | -1.888075 | 0.000182  |
| 10               | 1                | 0              | 1.728396                | -2.497216 | 0.882736  |
| 11               | 1                | 0              | 1.728008                | -2.497886 | -0.881784 |
| 12               | 1                | 0              | 3.072549                | -1.747520 | -0.000099 |
| 13               | 7                | 0              | -2.135961               | 0.571807  | -0.000023 |
| 14               | 1                | 0              | -2.803664               | 1.330389  | 0.000347  |
| 15               | 1                | 0              | -3.417308               | -1.148791 | 0.000158  |
| 16               | 1                | 0              | -1.104285               | -2.549603 | -0.000009 |
| 17               | 1                | 0              | 3.036118                | 0.650018  | 0.000045  |
| 18               | 1                | 0              | 1.902477                | 2.802156  | -0.000028 |

### CH3-deprotonated amino N9H M (M-7) B3LYP/6-31+G(d)

Zero-point correction= 0.140804  
(Hartree/Particle)  
Thermal correction to Energy= 0.149129  
Thermal correction to Enthalpy= 0.150073  
Thermal correction to Gibbs Free Energy= 0.108234  
Sum of electronic and zero-point Energies= -402.388583  
Sum of electronic and thermal Energies= -402.380259  
Sum of electronic and thermal Enthalpies= -402.379315  
Sum of electronic and thermal Free Energies= -402.421153

|       | E (Thermal)<br>KCal/Mol | CV<br>Cal/Mol-Kelvin | S<br>Cal/Mol-Kelvin |
|-------|-------------------------|----------------------|---------------------|
| Total | 93.580                  | 33.989               | 88.056              |

### N9-deprotonated amino N9H M (M-8) B3LYP/6-31+G(d)

SCF Done: E(RB+HF-LYP) = -402.584141757 A.U.

Zero-point correction= 0.142986  
(Hartree/Particle)  
Thermal correction to Energy= 0.150691  
Thermal correction to Enthalpy= 0.151635  
Thermal correction to Gibbs Free Energy= 0.110822  
Sum of electronic and zero-point Energies= -402.441156

Sum of electronic and thermal Energies= -402.433451  
 Sum of electronic and thermal Enthalpies= -402.432506  
 Sum of electronic and thermal Free Energies= -402.473319

|       | E (Thermal)<br>KCal/Mol | CV<br>Cal/Mol-Kelvin | S<br>Cal/Mol-Kelvin |
|-------|-------------------------|----------------------|---------------------|
| Total | 94.560                  | 31.114               | 85.898              |

| Center<br>Number | Atomic<br>Number | Atomic<br>Type | Coordinates (Angstroms) |           |           |
|------------------|------------------|----------------|-------------------------|-----------|-----------|
|                  |                  |                | X                       | Y         | Z         |
| 1                | 6                | 0              | -0.191037               | -0.517302 | 0.000104  |
| 2                | 6                | 0              | -0.852253               | 0.772820  | 0.000116  |
| 3                | 6                | 0              | -0.085702               | 1.954525  | 0.000163  |
| 4                | 6                | 0              | 1.304702                | 1.860752  | -0.000114 |
| 5                | 6                | 0              | 1.948981                | 0.597208  | -0.000180 |
| 6                | 6                | 0              | 1.222509                | -0.595108 | 0.000125  |
| 7                | 6                | 0              | -1.250771               | -1.469443 | -0.000040 |
| 8                | 6                | 0              | -2.427038               | -0.699250 | -0.000109 |
| 9                | 1                | 0              | -0.584967               | 2.923192  | 0.000301  |
| 10               | 1                | 0              | 1.911363                | 2.766570  | -0.000130 |
| 11               | 1                | 0              | 3.039548                | 0.555873  | -0.000406 |
| 12               | 1                | 0              | -1.178702               | -2.552859 | -0.000020 |
| 13               | 1                | 0              | -3.446619               | -1.084433 | -0.000287 |
| 14               | 6                | 0              | 1.914015                | -1.938893 | 0.000055  |
| 15               | 1                | 0              | 1.635762                | -2.536698 | 0.881744  |
| 16               | 1                | 0              | 1.634655                | -2.537163 | -0.880959 |
| 17               | 1                | 0              | 3.007027                | -1.829056 | -0.000652 |
| 18               | 7                | 0              | -2.216929               | 0.643246  | -0.000045 |

**C7-deprotonated amino N9H M (M-9) B3LYP/6-31+G(d)**

SCF Done: E(RB+HF-LYP) = -402.507828035 A.U.

Zero-point correction= 0.141605  
 (Hartree/Particle)

Thermal correction to Energy= 0.150124  
 Thermal correction to Enthalpy= 0.151068  
 Thermal correction to Gibbs Free Energy= 0.108082  
 Sum of electronic and zero-point Energies= -402.366224  
 Sum of electronic and thermal Energies= -402.357704  
 Sum of electronic and thermal Enthalpies= -402.356760  
 Sum of electronic and thermal Free Energies= -402.399746

|       | E (Thermal)<br>KCal/Mol | CV<br>Cal/Mol-Kelvin | S<br>Cal/Mol-Kelvin |
|-------|-------------------------|----------------------|---------------------|
| Total | 94.204                  | 32.781               | 90.471              |

| Center<br>Number | Atomic<br>Number | Atomic<br>Type | Coordinates (Angstroms) |           |           |
|------------------|------------------|----------------|-------------------------|-----------|-----------|
|                  |                  |                | X                       | Y         | Z         |
| 1                | 6                | 0              | -0.182224               | -0.556381 | 0.000319  |
| 2                | 6                | 0              | -0.818575               | 0.734429  | 0.005070  |
| 3                | 6                | 0              | -0.107761               | 1.942712  | 0.001610  |
| 4                | 6                | 0              | 1.287284                | 1.868485  | -0.004661 |

|    |   |   |           |           |           |
|----|---|---|-----------|-----------|-----------|
| 5  | 6 | 0 | 1.944112  | 0.617792  | -0.003258 |
| 6  | 6 | 0 | 1.233842  | -0.589284 | 0.001083  |
| 7  | 6 | 0 | -1.166437 | -1.638665 | -0.006355 |
| 8  | 6 | 0 | -2.347131 | -0.928801 | -0.007759 |
| 9  | 1 | 0 | -0.613352 | 2.909773  | 0.006108  |
| 10 | 1 | 0 | 1.876695  | 2.785262  | -0.008846 |
| 11 | 1 | 0 | 3.034873  | 0.594122  | -0.005862 |
| 12 | 6 | 0 | 1.952501  | -1.917504 | 0.002416  |
| 13 | 1 | 0 | 1.688492  | -2.505066 | 0.891235  |
| 14 | 1 | 0 | 1.646831  | -2.527579 | -0.856933 |
| 15 | 1 | 0 | 3.043214  | -1.783310 | -0.023767 |
| 16 | 7 | 0 | -2.169326 | 0.488271  | 0.023366  |
| 17 | 1 | 0 | -2.886823 | 1.192780  | -0.088287 |
| 18 | 1 | 0 | -3.378308 | -1.280581 | -0.008000 |

***N9-protonated amino N9H M (M-10) B3LYP/6-31+G(d)***

SCF Done: E(RB+HF-LYP) = -403.480744448 A.U.

Zero-point correction= 0.171033  
(Hartree/Particle)  
Thermal correction to Energy= 0.179260  
Thermal correction to Enthalpy= 0.180205  
Thermal correction to Gibbs Free Energy= 0.138039  
Sum of electronic and zero-point Energies= -403.309712  
Sum of electronic and thermal Energies= -403.301484  
Sum of electronic and thermal Enthalpies= -403.300540  
Sum of electronic and thermal Free Energies= -403.342706

|       | E (Thermal) | CV             | S              |
|-------|-------------|----------------|----------------|
|       | KCal/Mol    | Cal/Mol-Kelvin | Cal/Mol-Kelvin |
| Total | 112.488     | 32.804         | 88.746         |

| Center<br>Number | Atomic<br>Number | Atomic<br>Type | Coordinates (Angstroms) |           |           |
|------------------|------------------|----------------|-------------------------|-----------|-----------|
|                  |                  |                | X                       | Y         | Z         |
| 1                | 6                | 0              | -0.101336               | -0.496008 | -0.000005 |
| 2                | 6                | 0              | -0.709166               | 0.763577  | 0.000054  |
| 3                | 6                | 0              | -0.035767               | 1.967911  | 0.000070  |
| 4                | 6                | 0              | 1.363951                | 1.867335  | -0.000030 |
| 5                | 6                | 0              | 2.003550                | 0.622265  | -0.000119 |
| 6                | 6                | 0              | 1.299886                | -0.594478 | -0.000092 |
| 7                | 6                | 0              | -1.156700               | -1.511090 | 0.000050  |
| 8                | 6                | 0              | -2.363938               | -0.931278 | -0.000135 |
| 9                | 6                | 0              | 2.006984                | -1.925619 | 0.000101  |
| 10               | 1                | 0              | 1.744942                | -2.518403 | 0.885014  |
| 11               | 1                | 0              | 1.744815                | -2.518677 | -0.884604 |
| 12               | 1                | 0              | 3.091720                | -1.792451 | 0.000006  |
| 13               | 7                | 0              | -2.186647               | 0.555790  | 0.000047  |
| 14               | 1                | 0              | -2.630488               | 0.981245  | -0.825872 |
| 15               | 1                | 0              | -3.373014               | -1.317946 | -0.000195 |
| 16               | 1                | 0              | -1.000104               | -2.583054 | -0.000086 |
| 17               | 1                | 0              | 3.089579                | 0.594969  | -0.000144 |
| 18               | 1                | 0              | 1.959838                | 2.774672  | 0.000007  |
| 19               | 1                | 0              | -0.535007               | 2.932355  | 0.000132  |

20 1 0 -2.630538 0.981078 0.826054

**C7-protonated amino N9H M (M-11) B3LYP/6-31+G(d)**

SCF Done: E(RB3LYP) = -403.504822556

Zero-point correction= 0.169918  
(Hartree/Particle)  
Thermal correction to Energy= 0.178113  
Thermal correction to Enthalpy= 0.179058  
Thermal correction to Gibbs Free Energy= 0.136906  
Sum of electronic and zero-point Energies= -403.334904  
Sum of electronic and thermal Energies= -403.326709  
Sum of electronic and thermal Enthalpies= -403.325765  
Sum of electronic and thermal Free Energies= -403.367917

|       | E (Thermal)<br>KCal/Mol | CV<br>Cal/Mol-Kelvin | S<br>Cal/Mol-Kelvin |
|-------|-------------------------|----------------------|---------------------|
| Total | 111.768                 | 32.598               | 88.717              |

| Center<br>Number | Atomic<br>Number | Atomic<br>Type | Coordinates (Angstroms) |           |           |
|------------------|------------------|----------------|-------------------------|-----------|-----------|
|                  |                  |                | X                       | Y         | Z         |
| 1                | 6                | 0              | -0.124949               | -0.473390 | 0.000000  |
| 2                | 6                | 0              | -0.700652               | 0.805047  | 0.000000  |
| 3                | 6                | 0              | 0.020855                | 1.992638  | 0.000001  |
| 4                | 6                | 0              | 1.409769                | 1.846464  | 0.000000  |
| 5                | 6                | 0              | 2.008125                | 0.577631  | -0.000001 |
| 6                | 6                | 0              | 1.264440                | -0.617398 | -0.000001 |
| 7                | 6                | 0              | -1.242551               | -1.488421 | 0.000000  |
| 8                | 6                | 0              | -2.460406               | -0.629249 | -0.000001 |
| 9                | 1                | 0              | -0.452303               | 2.969703  | 0.000001  |
| 10               | 1                | 0              | 2.038755                | 2.731137  | 0.000000  |
| 11               | 1                | 0              | 3.092758                | 0.513783  | -0.000002 |
| 12               | 1                | 0              | -1.249019               | -2.156273 | -0.876448 |
| 13               | 1                | 0              | -3.500451               | -0.936397 | -0.000001 |
| 14               | 6                | 0              | 1.924795                | -1.972197 | 0.000000  |
| 15               | 1                | 0              | 1.639710                | -2.556275 | 0.884247  |
| 16               | 1                | 0              | 1.639665                | -2.556299 | -0.884216 |
| 17               | 1                | 0              | 3.013912                | -1.881532 | -0.000029 |
| 18               | 7                | 0              | -2.113230               | 0.626091  | 0.000000  |
| 19               | 1                | 0              | -2.777969               | 1.399031  | -0.000001 |
| 20               | 1                | 0              | -1.249020               | -2.156270 | 0.876451  |

**C8-deprotonated amino C7H M (M-12) B3LYP/6-31+G(d)**

SCF Done: E(RB3LYP) = -402.507105783

Zero-point correction= 0.141058  
(Hartree/Particle)  
Thermal correction to Energy= 0.149238  
Thermal correction to Enthalpy= 0.150182

Thermal correction to Gibbs Free Energy= 0.108154  
 Sum of electronic and zero-point Energies= -402.366048  
 Sum of electronic and thermal Energies= -402.357868  
 Sum of electronic and thermal Enthalpies= -402.356924  
 Sum of electronic and thermal Free Energies= -402.398951

|       | E (Thermal)<br>KCal/Mol | CV<br>Cal/Mol-Kelvin | S<br>Cal/Mol-Kelvin |
|-------|-------------------------|----------------------|---------------------|
| Total | 93.648                  | 32.030               | 88.455              |

| Center<br>Number | Atomic<br>Number | Atomic<br>Type | Coordinates (Angstroms) |           |           |
|------------------|------------------|----------------|-------------------------|-----------|-----------|
|                  |                  |                | X                       | Y         | Z         |
| 1                | 6                | 0              | -0.188357               | -0.487414 | 0.000054  |
| 2                | 6                | 0              | -0.844367               | 0.764846  | -0.000015 |
| 3                | 6                | 0              | -0.096274               | 1.950487  | -0.000163 |
| 4                | 6                | 0              | 1.301537                | 1.862574  | -0.000239 |
| 5                | 6                | 0              | 1.947799                | 0.618096  | -0.000170 |
| 6                | 6                | 0              | 1.203158                | -0.580909 | -0.000022 |
| 7                | 6                | 0              | -1.306118               | -1.498266 | 0.000208  |
| 8                | 6                | 0              | -2.618421               | -0.635527 | 0.000213  |
| 9                | 6                | 0              | 1.900132                | -1.925595 | 0.000051  |
| 10               | 1                | 0              | 1.623299                | -2.522534 | 0.880505  |
| 11               | 1                | 0              | 1.623202                | -2.522679 | -0.880274 |
| 12               | 1                | 0              | 2.992301                | -1.812249 | -0.000019 |
| 13               | 7                | 0              | -2.252993               | 0.644463  | 0.000081  |
| 14               | 1                | 0              | -1.299128               | -2.162531 | -0.879422 |
| 15               | 1                | 0              | -1.299023               | -2.162381 | 0.879950  |
| 16               | 1                | 0              | 3.037441                | 0.574482  | -0.000231 |
| 17               | 1                | 0              | 1.901585                | 2.773185  | -0.000355 |
| 18               | 1                | 0              | -0.603253               | 2.913714  | -0.000217 |

**C1-deprotonated amino C7H M (M-13) B3LYP/6-31+G(d)**

SCF Done: E(RB3LYP) = -402.494533394

Zero-point correction= 0.141099  
 (Hartree/Particle)  
 Thermal correction to Energy= 0.149190  
 Thermal correction to Enthalpy= 0.150135  
 Thermal correction to Gibbs Free Energy= 0.108252  
 Sum of electronic and zero-point Energies= -402.353434  
 Sum of electronic and thermal Energies= -402.345343  
 Sum of electronic and thermal Enthalpies= -402.344399  
 Sum of electronic and thermal Free Energies= -402.386282

|       | E (Thermal)<br>KCal/Mol | CV<br>Cal/Mol-Kelvin | S<br>Cal/Mol-Kelvin |
|-------|-------------------------|----------------------|---------------------|
| Total | 93.618                  | 31.672               | 88.150              |

| Center | Atomic | Atomic | Coordinates (Angstroms) |  |  |
|--------|--------|--------|-------------------------|--|--|
|--------|--------|--------|-------------------------|--|--|

| Number | Number | Type | X         | Y         | Z         |
|--------|--------|------|-----------|-----------|-----------|
| 1      | 6      | 0    | -0.121652 | -0.442899 | 0.000046  |
| 2      | 6      | 0    | -0.726649 | 0.828633  | -0.000022 |
| 3      | 6      | 0    | 0.059421  | 1.980555  | -0.000170 |
| 4      | 6      | 0    | 1.456323  | 1.805222  | -0.000245 |
| 5      | 6      | 0    | 2.134953  | 0.554690  | -0.000183 |
| 6      | 6      | 0    | 1.272207  | -0.581806 | -0.000032 |
| 7      | 6      | 0    | -1.258276 | -1.446409 | 0.000201  |
| 8      | 6      | 0    | -2.453842 | -0.512258 | 0.000199  |
| 9      | 6      | 0    | 1.861737  | -1.984150 | 0.000047  |
| 10     | 1      | 0    | 1.551758  | -2.568809 | 0.883856  |
| 11     | 1      | 0    | 1.551654  | -2.568952 | -0.883630 |
| 12     | 1      | 0    | 2.954468  | -1.911323 | -0.000023 |
| 13     | 7      | 0    | -2.147938 | 0.743769  | 0.000075  |
| 14     | 1      | 0    | -3.494337 | -0.839006 | 0.000292  |
| 15     | 1      | 0    | -1.261869 | -2.109455 | -0.880626 |
| 16     | 1      | 0    | 2.056350  | 2.722915  | -0.000362 |
| 17     | 1      | 0    | -0.406027 | 2.968092  | -0.000224 |
| 18     | 1      | 0    | -1.261759 | -2.109310 | 0.881138  |

**C2-deprotonated amino C7H M (M-14) B3LYP/6-31+G(d)**

SCF Done: E(RB3LYP) = -402.491088014

Zero-point correction= 0.141259

(Hartree/Particle)

Thermal correction to Energy= 0.149324

Thermal correction to Enthalpy= 0.150268

Thermal correction to Gibbs Free Energy= 0.108588

Sum of electronic and zero-point Energies= -402.349829

Sum of electronic and thermal Energies= -402.341764

Sum of electronic and thermal Enthalpies= -402.340820

Sum of electronic and thermal Free Energies= -402.382500

|       | E (Thermal) | CV             | S              |
|-------|-------------|----------------|----------------|
|       | KCal/Mol    | Cal/Mol-Kelvin | Cal/Mol-Kelvin |
| Total | 93.702      | 31.614         | 87.724         |

| Center Number | Atomic Number | Atomic Type | Coordinates (Angstroms) |           |           |
|---------------|---------------|-------------|-------------------------|-----------|-----------|
|               |               |             | X                       | Y         | Z         |
| 1             | 6             | 0           | -0.129335               | -0.449198 | 0.000048  |
| 2             | 6             | 0           | -0.758799               | 0.810660  | -0.000025 |
| 3             | 6             | 0           | -0.023420               | 2.000882  | -0.000173 |
| 4             | 6             | 0           | 1.399195                | 2.011920  | -0.000258 |
| 5             | 6             | 0           | 1.966225                | 0.707933  | -0.000177 |
| 6             | 6             | 0           | 1.262861                | -0.522627 | -0.000029 |
| 7             | 6             | 0           | -1.219049               | -1.493207 | 0.000203  |
| 8             | 6             | 0           | -2.444827               | -0.595410 | 0.000196  |
| 9             | 6             | 0           | 1.980428                | -1.856026 | 0.000043  |
| 10            | 1             | 0           | 1.727182                | -2.464586 | 0.882993  |
| 11            | 1             | 0           | 1.727085                | -2.464732 | -0.882779 |



|    |   |   |           |           |           |
|----|---|---|-----------|-----------|-----------|
| 12 | 1 | 0 | 3.068571  | -1.710765 | -0.000030 |
| 13 | 7 | 0 | -2.185828 | 0.667858  | 0.000072  |
| 14 | 1 | 0 | -3.471746 | -0.964259 | 0.000288  |
| 15 | 1 | 0 | -1.211292 | -2.156596 | -0.881356 |
| 16 | 1 | 0 | -0.588806 | 2.938621  | -0.000224 |
| 17 | 1 | 0 | -1.211190 | -2.156443 | 0.881875  |
| 18 | 1 | 0 | 3.061316  | 0.614189  | -0.000233 |

**C3-deprotonated amino C7H M (M-15) B3LYP/6-31+G(d)**

SCF Done: E(RB3LYP) = -402.493139686

Zero-point correction= 0.141147  
(Hartree/Particle)

Thermal correction to Energy= 0.149202

Thermal correction to Enthalpy= 0.150146

Thermal correction to Gibbs Free Energy= 0.108428

Sum of electronic and zero-point Energies= -402.351993

Sum of electronic and thermal Energies= -402.343938

Sum of electronic and thermal Enthalpies= -402.342993

Sum of electronic and thermal Free Energies= -402.384712

|       | E (Thermal)<br>KCal/Mol | CV<br>Cal/Mol-Kelvin | S<br>Cal/Mol-Kelvin |
|-------|-------------------------|----------------------|---------------------|
| Total | 93.626                  | 31.597               | 87.805              |

| Center<br>Number | Atomic<br>Number | Atomic<br>Type | Coordinates (Angstroms) |           |           |
|------------------|------------------|----------------|-------------------------|-----------|-----------|
|                  |                  |                | X                       | Y         | Z         |
| 1                | 6                | 0              | 0.172483                | 0.413181  | 0.000047  |
| 2                | 6                | 0              | 0.728805                | -0.893442 | -0.000027 |
| 3                | 6                | 0              | 0.014325                | -2.106878 | -0.000174 |
| 4                | 6                | 0              | -1.385235               | -1.846257 | -0.000243 |
| 5                | 6                | 0              | -1.983361               | -0.571959 | -0.000175 |
| 6                | 6                | 0              | -1.208316               | 0.603696  | -0.000027 |
| 7                | 6                | 0              | 1.302354                | 1.410816  | 0.000201  |
| 8                | 6                | 0              | 2.486090                | 0.458714  | 0.000197  |
| 9                | 6                | 0              | -1.831009               | 1.982095  | 0.000047  |
| 10               | 1                | 0              | -1.535619               | 2.572480  | 0.882120  |
| 11               | 1                | 0              | -1.535510               | 2.572624  | -0.881892 |
| 12               | 1                | 0              | -2.927253               | 1.918716  | -0.000026 |
| 13               | 7                | 0              | 2.174229                | -0.789004 | 0.000074  |
| 14               | 1                | 0              | 3.526892                | 0.788102  | 0.000290  |
| 15               | 1                | 0              | 1.315317                | 2.073676  | -0.882083 |
| 16               | 1                | 0              | 1.315206                | 2.073531  | 0.882595  |
| 17               | 1                | 0              | -3.074758               | -0.480441 | -0.000237 |
| 18               | 1                | 0              | -2.080693               | -2.695467 | -0.000359 |

**CH3-deprotonated amino C7H M (M-16) B3LYP/6-31+G(d)**

SCF Done: E(RB3LYP) = -402.525540047

Zero-point correction= 0.140673  
(Hartree/Particle)

Thermal correction to Energy= 0.148489  
 Thermal correction to Enthalpy= 0.149433  
 Thermal correction to Gibbs Free Energy= 0.108646  
 Sum of electronic and zero-point Energies= -402.384867  
 Sum of electronic and thermal Energies= -402.377051  
 Sum of electronic and thermal Enthalpies= -402.376107  
 Sum of electronic and thermal Free Energies= -402.416894

|       | E (Thermal)<br>KCal/Mol | CV<br>Cal/Mol-Kelvin | S<br>Cal/Mol-Kelvin |
|-------|-------------------------|----------------------|---------------------|
| Total | 93.178                  | 32.387               | 85.843              |

| Center<br>Number | Atomic<br>Number | Atomic<br>Type | Coordinates (Angstroms) |           |           |
|------------------|------------------|----------------|-------------------------|-----------|-----------|
|                  |                  |                | X                       | Y         | Z         |
| 1                | 6                | 0              | 0.183648                | 0.474917  | 0.000050  |
| 2                | 6                | 0              | 0.658212                | -0.837823 | -0.000016 |
| 3                | 6                | 0              | -0.182834               | -1.959163 | -0.000167 |
| 4                | 6                | 0              | -1.566218               | -1.665353 | -0.000248 |
| 5                | 6                | 0              | -2.060045               | -0.366596 | -0.000178 |
| 6                | 6                | 0              | -1.213908               | 0.813990  | -0.000026 |
| 7                | 6                | 0              | 1.380091                | 1.375820  | 0.000208  |
| 8                | 6                | 0              | 2.492816                | 0.350441  | 0.000211  |
| 9                | 6                | 0              | -1.701530               | 2.119510  | 0.000039  |
| 10               | 7                | 0              | 2.091864                | -0.876346 | 0.000082  |
| 11               | 1                | 0              | 1.439416                | 2.043893  | -0.880045 |
| 12               | 1                | 0              | 1.439289                | 2.043757  | 0.880573  |
| 13               | 1                | 0              | -3.140268               | -0.213998 | -0.000238 |
| 14               | 1                | 0              | -2.281353               | -2.490305 | -0.000362 |
| 15               | 1                | 0              | 0.206682                | -2.972833 | -0.000218 |
| 16               | 1                | 0              | 3.557076                | 0.591963  | 0.000307  |
| 17               | 1                | 0              | -2.771209               | 2.319591  | 0.000145  |
| 18               | 1                | 0              | -1.034066               | 2.977901  | 0.000022  |

***B ("6-methylated" 1,3-deazaadenine): neutral, protonated and deprotonated species***

***Amino N9H B (B-1) B3LYP/6-31+G(d)***

SCF Done: E(RB+HF-LYP) = -419.201787472 A.U.

Zero-point correction= 0.145967  
 (Hartree/Particle)  
 Thermal correction to Energy= 0.153823  
 Thermal correction to Enthalpy= 0.154767  
 Thermal correction to Gibbs Free Energy= 0.113455  
 Sum of electronic and zero-point Energies= -419.055820  
 Sum of electronic and thermal Energies= -419.047964  
 Sum of electronic and thermal Enthalpies= -419.047020  
 Sum of electronic and thermal Free Energies= -419.088332

| E (Thermal) | CV | S |
|-------------|----|---|
|-------------|----|---|

| Total | KCal/Mol | Cal/Mol-Kelvin | Cal/Mol-Kelvin |
|-------|----------|----------------|----------------|
|       | 96.525   | 31.108         | 86.948         |

---

| Center<br>Number | Atomic<br>Number | Atomic<br>Type | Coordinates (Angstroms) |           |           |
|------------------|------------------|----------------|-------------------------|-----------|-----------|
|                  |                  |                | X                       | Y         | Z         |
| 1                | 6                | 0              | -0.799341               | 0.777053  | -0.000024 |
| 2                | 6                | 0              | -0.167620               | -0.488821 | 0.000024  |
| 3                | 6                | 0              | 1.237593                | -0.594275 | 0.000008  |
| 4                | 6                | 0              | 1.945955                | 0.608413  | 0.000102  |
| 5                | 6                | 0              | 1.304031                | 1.866226  | 0.000006  |
| 6                | 6                | 0              | -0.083769               | 1.978661  | -0.000024 |
| 7                | 6                | 0              | -2.272370               | -0.884675 | 0.000010  |
| 8                | 1                | 0              | 3.033244                | 0.577100  | -0.000007 |
| 9                | 1                | 0              | 1.910781                | 2.768046  | -0.000033 |
| 10               | 1                | 0              | -0.575302               | 2.947851  | -0.000084 |
| 11               | 1                | 0              | -3.241478               | -1.368107 | 0.000041  |
| 12               | 7                | 0              | -1.119495               | -1.504297 | 0.000061  |
| 13               | 7                | 0              | -2.155152               | 0.487366  | -0.000055 |
| 14               | 1                | 0              | -2.915929               | 1.151665  | 0.000072  |
| 15               | 6                | 0              | 1.913026                | -1.940431 | -0.000073 |
| 16               | 1                | 0              | 1.622395                | -2.528032 | 0.879304  |
| 17               | 1                | 0              | 1.620988                | -2.528663 | -0.878552 |
| 18               | 1                | 0              | 3.002807                | -1.834258 | -0.000956 |

### Amino N7H B (B-2) B3LYP/6-31+G(d)

SCF Done: E(RB+HF-LYP) = -419.200960900 A.U.

Zero-point correction= 0.145916  
(Hartree/Particle)  
Thermal correction to Energy= 0.153761  
Thermal correction to Enthalpy= 0.154705  
Thermal correction to Gibbs Free Energy= 0.113522  
Sum of electronic and zero-point Energies= -419.055045  
Sum of electronic and thermal Energies= -419.047200  
Sum of electronic and thermal Enthalpies= -419.046256  
Sum of electronic and thermal Free Energies= -419.087439

| Total | E (Thermal)<br>KCal/Mol | CV<br>Cal/Mol-Kelvin | S<br>Cal/Mol-Kelvin |
|-------|-------------------------|----------------------|---------------------|
|       | 96.486                  | 31.136               | 86.676              |

---

| Center<br>Number | Atomic<br>Number | Atomic<br>Type | Coordinates (Angstroms) |           |           |
|------------------|------------------|----------------|-------------------------|-----------|-----------|
|                  |                  |                | X                       | Y         | Z         |
| 1                | 6                | 0              | -0.815903               | 0.810682  | 0.000172  |
| 2                | 6                | 0              | -0.172185               | -0.449473 | 0.000173  |
| 3                | 6                | 0              | 1.221935                | -0.608674 | 0.000149  |
| 4                | 6                | 0              | 1.952611                | 0.581407  | -0.000475 |
| 5                | 6                | 0              | 1.333913                | 1.851295  | -0.000252 |
| 6                | 6                | 0              | -0.050397               | 1.985714  | 0.000333  |
| 7                | 6                | 0              | -2.384113               | -0.645988 | -0.000385 |
| 8                | 7                | 0              | -1.211663               | -1.369277 | -0.000162 |
| 9                | 7                | 0              | -2.197561               | 0.649119  | 0.000152  |

|    |   |   |           |           |           |
|----|---|---|-----------|-----------|-----------|
| 10 | 6 | 0 | 1.871309  | -1.970223 | 0.000298  |
| 11 | 1 | 0 | 1.587709  | -2.556734 | 0.885504  |
| 12 | 1 | 0 | 1.587662  | -2.556875 | -0.884804 |
| 13 | 1 | 0 | 2.962477  | -1.883721 | 0.000226  |
| 14 | 1 | 0 | -3.349337 | -1.137147 | -0.000057 |
| 15 | 1 | 0 | 3.039034  | 0.525356  | -0.000740 |
| 16 | 1 | 0 | 1.960455  | 2.739372  | -0.000196 |
| 17 | 1 | 0 | -0.533243 | 2.958296  | 0.000663  |
| 18 | 1 | 0 | -1.133201 | -2.375885 | -0.000604 |

**Amino N7H B (B-2) B3LYP/6-31+G(d) cpcm, water, RADII=UAKS**

Total free energy in solution:  
with all non electrostatic terms (a.u.) = -419.217997

---

|                            |              |        |
|----------------------------|--------------|--------|
| (Polarized solute)-Solvent | (kcal/mol) = | -15.36 |
|----------------------------|--------------|--------|

---

|                         |              |        |
|-------------------------|--------------|--------|
| Cavitation energy       | (kcal/mol) = | 17.98  |
| Dispersion energy       | (kcal/mol) = | -20.63 |
| Repulsion energy        | (kcal/mol) = | 4.13   |
| Total non electrostatic | (kcal/mol) = | 1.47   |

**C8-deprotonated amino N9H B (B-3) B3LYP/6-31+G(d)**

SCF Done: E(RB+HF-LYP) = -418.585089690 A.U.

|                                              |             |
|----------------------------------------------|-------------|
| Zero-point correction=                       | 0.131011    |
| (Hartree/Particle)                           |             |
| Thermal correction to Energy=                | 0.138916    |
| Thermal correction to Enthalpy=              | 0.139860    |
| Thermal correction to Gibbs Free Energy=     | 0.098476    |
| Sum of electronic and zero-point Energies=   | -418.454079 |
| Sum of electronic and thermal Energies=      | -418.446174 |
| Sum of electronic and thermal Enthalpies=    | -418.445230 |
| Sum of electronic and thermal Free Energies= | -418.486614 |

|       | E (Thermal)<br>KCal/Mol | CV<br>Cal/Mol-Kelvin | S<br>Cal/Mol-Kelvin |
|-------|-------------------------|----------------------|---------------------|
| Total | 87.171                  | 31.121               | 87.100              |

| Center<br>Number | Atomic<br>Number | Atomic<br>Type | Coordinates (Angstroms) |           |           |
|------------------|------------------|----------------|-------------------------|-----------|-----------|
|                  |                  |                | X                       | Y         | Z         |
| 1                | 6                | 0              | -0.874605               | 0.732540  | 0.000027  |
| 2                | 6                | 0              | -0.196694               | -0.519909 | 0.000042  |
| 3                | 6                | 0              | 1.212477                | -0.552301 | -0.000061 |
| 4                | 6                | 0              | 1.892085                | 0.674724  | -0.000175 |
| 5                | 6                | 0              | 1.208956                | 1.908028  | -0.000188 |
| 6                | 6                | 0              | -0.192107               | 1.952058  | -0.000087 |
| 7                | 6                | 0              | -2.363407               | -1.048981 | 0.000230  |
| 8                | 1                | 0              | 2.982978                | 0.674361  | -0.000254 |
| 9                | 1                | 0              | 1.778577                | 2.836795  | -0.000279 |
| 10               | 1                | 0              | -0.719361               | 2.906323  | -0.000098 |
| 11               | 7                | 0              | -1.106880               | -1.561427 | 0.000163  |
| 12               | 7                | 0              | -2.204621               | 0.365441  | 0.000145  |

|    |   |   |           |           |           |
|----|---|---|-----------|-----------|-----------|
| 13 | 6 | 0 | 1.940428  | -1.873673 | -0.000048 |
| 14 | 1 | 0 | 1.667391  | -2.475969 | 0.876819  |
| 15 | 1 | 0 | 1.667262  | -2.476058 | -0.876813 |
| 16 | 1 | 0 | 3.029325  | -1.729474 | -0.000135 |
| 17 | 1 | 0 | -2.988463 | 1.001011  | 0.000171  |

**CH3-deprotonated amino N9H B (B-4) B3LYP/6-31+G(d)**

SCF Done: E(RB3LYP) = -418.583367925  
Zero-point correction= 0.129731  
(Hartree/Particle)  
Thermal correction to Energy= 0.137634  
Thermal correction to Enthalpy= 0.138578  
Thermal correction to Gibbs Free Energy= 0.097654  
Sum of electronic and zero-point Energies= -418.453637  
Sum of electronic and thermal Energies= -418.445734  
Sum of electronic and thermal Enthalpies= -418.444790  
Sum of electronic and thermal Free Energies= -418.485714

|       | E (Thermal)<br>KCal/Mol | CV<br>Cal/Mol-Kelvin | S<br>Cal/Mol-Kelvin |
|-------|-------------------------|----------------------|---------------------|
| Total | 86.366                  | 32.442               | 86.132              |

| Center<br>Number | Atomic<br>Number | Atomic<br>Type | Coordinates (Angstroms) |           |           |
|------------------|------------------|----------------|-------------------------|-----------|-----------|
|                  |                  |                | X                       | Y         | Z         |
| 1                | 6                | 0              | 0.191011                | -0.518380 | -0.000200 |
| 2                | 6                | 0              | -1.238495               | -0.794023 | -0.000130 |
| 3                | 6                | 0              | -2.029450               | 0.425232  | -0.000242 |
| 4                | 6                | 0              | -1.484123               | 1.703982  | -0.000012 |
| 5                | 6                | 0              | -0.093867               | 1.962289  | -0.000209 |
| 6                | 6                | 0              | 0.699374                | 0.797111  | -0.000010 |
| 7                | 1                | 0              | -3.114547               | 0.317645  | -0.000458 |
| 8                | 1                | 0              | -2.169117               | 2.554449  | 0.000116  |
| 9                | 1                | 0              | 0.318999                | 2.967823  | 0.001872  |
| 10               | 6                | 0              | 2.338105                | -0.727265 | 0.000049  |
| 11               | 6                | 0              | -1.775977               | -2.067978 | 0.000396  |
| 12               | 1                | 0              | -1.140528               | -2.947803 | 0.000618  |
| 13               | 1                | 0              | -2.854693               | -2.215759 | 0.000939  |
| 14               | 7                | 0              | 2.080339                | 0.633962  | -0.000044 |
| 15               | 1                | 0              | 2.764410                | 1.375362  | 0.001619  |
| 16               | 1                | 0              | 3.348627                | -1.118723 | 0.000119  |
| 17               | 7                | 0              | 1.235001                | -1.436647 | -0.000340 |

**C1-deprotonated amino N9H B (B-5) B3LYP/6-31+G(d)**

SCF Done: E(RB+HF-LYP) = -418.550879505 A.U.  
Zero-point correction= 0.130142  
(Hartree/Particle)  
Thermal correction to Energy= 0.138327

Thermal correction to Enthalpy= 0.139271  
 Thermal correction to Gibbs Free Energy= 0.097217  
 Sum of electronic and zero-point Energies= -418.420738  
 Sum of electronic and thermal Energies= -418.412552  
 Sum of electronic and thermal Enthalpies= -418.411608  
 Sum of electronic and thermal Free Energies= -418.453663

|       | E (Thermal)<br>KCal/Mol | CV<br>Cal/Mol-Kelvin | S<br>Cal/Mol-Kelvin |
|-------|-------------------------|----------------------|---------------------|
| Total | 86.802                  | 31.583               | 88.511              |

| Center<br>Number | Atomic<br>Number | Atomic<br>Type | Coordinates (Angstroms) |           |           |
|------------------|------------------|----------------|-------------------------|-----------|-----------|
|                  |                  |                | X                       | Y         | Z         |
| 1                | 6                | 0              | 0.775933                | 0.774442  | 0.000003  |
| 2                | 6                | 0              | 0.115354                | -0.475063 | -0.000027 |
| 3                | 6                | 0              | -1.301497               | -0.534898 | -0.000031 |
| 4                | 6                | 0              | -2.077293               | 0.645210  | -0.000023 |
| 5                | 6                | 0              | -1.331330               | 1.864797  | -0.000010 |
| 6                | 6                | 0              | 0.068776                | 1.979639  | 0.000020  |
| 7                | 6                | 0              | 2.233149                | -0.911607 | -0.000008 |
| 8                | 1                | 0              | -1.883819               | 2.812112  | -0.000012 |
| 9                | 1                | 0              | 0.576658                | 2.948693  | 0.000085  |
| 10               | 7                | 0              | 1.069213                | -1.512043 | -0.000017 |
| 11               | 7                | 0              | 2.137108                | 0.463873  | 0.000033  |
| 12               | 6                | 0              | -1.958331               | -1.903314 | 0.000035  |
| 13               | 1                | 0              | -1.671116               | -2.500090 | -0.880703 |
| 14               | 1                | 0              | -1.671346               | -2.499886 | 0.880976  |
| 15               | 1                | 0              | -3.045255               | -1.769775 | -0.000121 |
| 16               | 1                | 0              | 2.904153                | 1.119121  | -0.000085 |
| 17               | 1                | 0              | 3.197911                | -1.408216 | -0.000004 |

**C2-deprotonated amino N9H B (B-6) B3LYP/6-31+G(d)**

SCF Done: E(RB+HF-LYP) = -418.554131873 A.U.

Zero-point correction= 0.130634  
 (Hartree/Particle)  
 Thermal correction to Energy= 0.138660  
 Thermal correction to Enthalpy= 0.139604  
 Thermal correction to Gibbs Free Energy= 0.098069  
 Sum of electronic and zero-point Energies= -418.423498  
 Sum of electronic and thermal Energies= -418.415472  
 Sum of electronic and thermal Enthalpies= -418.414528  
 Sum of electronic and thermal Free Energies= -418.456063

|       | E (Thermal)<br>KCal/Mol | CV<br>Cal/Mol-Kelvin | S<br>Cal/Mol-Kelvin |
|-------|-------------------------|----------------------|---------------------|
| Total | 87.011                  | 31.293               | 87.418              |

| Center<br>Number | Atomic<br>Number | Atomic<br>Type | Coordinates (Angstroms) |           |           |
|------------------|------------------|----------------|-------------------------|-----------|-----------|
|                  |                  |                | X                       | Y         | Z         |
| 1                | 6                | 0              | 0.802264                | 0.760984  | -0.000039 |
| 2                | 6                | 0              | 0.125919                | -0.478878 | -0.000018 |

|    |   |   |           |           |           |
|----|---|---|-----------|-----------|-----------|
| 3  | 6 | 0 | -1.285026 | -0.486414 | 0.000078  |
| 4  | 6 | 0 | -1.909262 | 0.769262  | 0.000144  |
| 5  | 6 | 0 | -1.273809 | 2.059330  | 0.000127  |
| 6  | 6 | 0 | 0.134568  | 1.998882  | 0.000032  |
| 7  | 6 | 0 | 2.219549  | -0.973225 | -0.000171 |
| 8  | 1 | 0 | 0.737003  | 2.916713  | 0.000010  |
| 9  | 7 | 0 | 1.037080  | -1.542366 | -0.000102 |
| 10 | 7 | 0 | 2.155729  | 0.403808  | -0.000139 |
| 11 | 6 | 0 | -2.051833 | -1.787819 | 0.000105  |
| 12 | 1 | 0 | -1.814009 | -2.403538 | -0.879912 |
| 13 | 1 | 0 | -1.813902 | -2.403565 | 0.880075  |
| 14 | 1 | 0 | -3.132748 | -1.595258 | 0.000174  |
| 15 | 1 | 0 | 2.938703  | 1.040172  | -0.000178 |
| 16 | 1 | 0 | 3.167811  | -1.499813 | -0.000248 |
| 17 | 1 | 0 | -3.006739 | 0.742459  | 0.000216  |

**N9-deprotonated amino N9H B (B-7) B3LYP/6-31+G(d)**

SCF Done: E(RB+HF-LYP) = -418.649247360 A.U.

Zero-point correction= 0.132202  
(Hartree/Particle)  
Thermal correction to Energy= 0.139739  
Thermal correction to Enthalpy= 0.140683  
Thermal correction to Gibbs Free Energy= 0.099950  
Sum of electronic and zero-point Energies= -418.517045  
Sum of electronic and thermal Energies= -418.509508  
Sum of electronic and thermal Enthalpies= -418.508564  
Sum of electronic and thermal Free Energies= -418.549297

|       | E (Thermal)<br>KCal/Mol | CV<br>Cal/Mol-Kelvin | S<br>Cal/Mol-Kelvin |
|-------|-------------------------|----------------------|---------------------|
| Total | 87.688                  | 29.638               | 85.731              |

| Center<br>Number | Atomic<br>Number | Atomic<br>Type | Coordinates (Angstroms) |           |           |
|------------------|------------------|----------------|-------------------------|-----------|-----------|
|                  |                  |                | X                       | Y         | Z         |
| 1                | 6                | 0              | -0.868436               | 0.776752  | -0.000042 |
| 2                | 6                | 0              | -0.209251               | -0.499554 | -0.000024 |
| 3                | 6                | 0              | 1.198549                | -0.596095 | -0.000036 |
| 4                | 6                | 0              | 1.918992                | 0.602799  | 0.000006  |
| 5                | 6                | 0              | 1.275063                | 1.864742  | 0.000134  |
| 6                | 6                | 0              | -0.116692               | 1.965271  | -0.000040 |
| 7                | 6                | 0              | -2.310457               | -0.776463 | 0.000001  |
| 8                | 1                | 0              | 3.009428                | 0.564854  | 0.000040  |
| 9                | 1                | 0              | 1.883596                | 2.769166  | 0.000059  |
| 10               | 1                | 0              | -0.612735               | 2.935346  | -0.000296 |
| 11               | 1                | 0              | -3.277963               | -1.276079 | 0.000140  |
| 12               | 7                | 0              | -1.163504               | -1.490961 | 0.000074  |
| 13               | 7                | 0              | -2.228847               | 0.570648  | -0.000017 |
| 14               | 6                | 0              | 1.878414                | -1.943821 | -0.000024 |
| 15               | 1                | 0              | 1.587717                | -2.537045 | 0.878109  |
| 16               | 1                | 0              | 1.587382                | -2.537147 | -0.877994 |
| 17               | 1                | 0              | 2.971940                | -1.838690 | -0.000310 |

### C3-deprotonated amino N9H B (B-8) B3LYP/6-31+G(d)

SCF Done: E(RB+HF-LYP) = -418.570675103 A.U.

Zero-point correction= 0.131506  
(Hartree/Particle)  
Thermal correction to Energy= 0.139298  
Thermal correction to Enthalpy= 0.140242  
Thermal correction to Gibbs Free Energy= 0.099108  
Sum of electronic and zero-point Energies= -418.439169  
Sum of electronic and thermal Energies= -418.431378  
Sum of electronic and thermal Enthalpies= -418.430433  
Sum of electronic and thermal Free Energies= -418.471567

|       | E (Thermal)<br>KCal/Mol | CV<br>Cal/Mol-Kelvin | S<br>Cal/Mol-Kelvin |
|-------|-------------------------|----------------------|---------------------|
| Total | 87.411                  | 30.643               | 86.573              |

| Center<br>Number | Atomic<br>Number | Atomic<br>Type | Coordinates (Angstroms) |           |           |
|------------------|------------------|----------------|-------------------------|-----------|-----------|
|                  |                  |                | X                       | Y         | Z         |
| 1                | 6                | 0              | 0.774969                | 0.814275  | 0.000020  |
| 2                | 6                | 0              | 0.165087                | -0.468934 | -0.000122 |
| 3                | 6                | 0              | -1.243240               | -0.559867 | -0.000217 |
| 4                | 6                | 0              | -1.911081               | 0.666156  | -0.000207 |
| 5                | 6                | 0              | -1.228722               | 1.918071  | 0.000071  |
| 6                | 6                | 0              | 0.171853                | 2.085314  | 0.000109  |
| 7                | 6                | 0              | 2.276472                | -0.850615 | -0.000002 |
| 8                | 7                | 0              | 1.121437                | -1.488696 | -0.000065 |
| 9                | 7                | 0              | 2.143757                | 0.507740  | 0.000027  |
| 10               | 6                | 0              | -1.952189               | -1.891851 | 0.000175  |
| 11               | 1                | 0              | -1.686711               | -2.497587 | -0.878849 |
| 12               | 1                | 0              | -1.687282               | -2.496827 | 0.879920  |
| 13               | 1                | 0              | -3.041688               | -1.753094 | -0.000193 |
| 14               | 1                | 0              | 2.872229                | 1.208896  | 0.000214  |
| 15               | 1                | 0              | 3.247351                | -1.335023 | 0.000058  |
| 16               | 1                | 0              | -3.005894               | 0.659633  | 0.000127  |
| 17               | 1                | 0              | -1.873264               | 2.805392  | 0.000027  |

### N9-protonated amino N9H B (B-9) B3LYP/6-31+G(d)

SCF Done: E(RB+HF-LYP) = -419.512049720 A.U.

Zero-point correction= 0.158484  
(Hartree/Particle)  
Thermal correction to Energy= 0.166700  
Thermal correction to Enthalpy= 0.167644  
Thermal correction to Gibbs Free Energy= 0.124731  
Sum of electronic and zero-point Energies= -419.353566  
Sum of electronic and thermal Energies= -419.345350  
Sum of electronic and thermal Enthalpies= -419.344406  
Sum of electronic and thermal Free Energies= -419.387318

| E (Thermal) | CV | S |
|-------------|----|---|
|-------------|----|---|



|       |                     |                          |                          |
|-------|---------------------|--------------------------|--------------------------|
| Total | KCal/Mol<br>104.606 | Cal/Mol-Kelvin<br>32.135 | Cal/Mol-Kelvin<br>90.317 |
|-------|---------------------|--------------------------|--------------------------|

| Center Number | Atomic Number | Atomic Type | Coordinates (Angstroms) |           |           |
|---------------|---------------|-------------|-------------------------|-----------|-----------|
|               |               |             | X                       | Y         | Z         |
| 1             | 6             | 0           | 0.741882                | 0.774348  | -0.000004 |
| 2             | 6             | 0           | 0.114921                | -0.479651 | -0.000001 |
| 3             | 6             | 0           | -1.276605               | -0.595217 | 0.000005  |
| 4             | 6             | 0           | -1.975776               | 0.630253  | -0.000004 |
| 5             | 6             | 0           | -1.333706               | 1.870644  | -0.000002 |
| 6             | 6             | 0           | 0.070422                | 1.976526  | -0.000002 |
| 7             | 6             | 0           | 2.229550                | -1.032221 | -0.000010 |
| 8             | 7             | 0           | 1.069598                | -1.525130 | 0.000004  |
| 9             | 7             | 0           | 2.200341                | 0.506999  | 0.000005  |
| 10            | 6             | 0           | -1.985166               | -1.922190 | 0.000002  |
| 11            | 1             | 0           | -2.629159               | -2.013345 | -0.882410 |
| 12            | 1             | 0           | -1.280899               | -2.756477 | -0.000079 |
| 13            | 1             | 0           | -2.629042               | -2.013415 | 0.882492  |
| 14            | 1             | 0           | 2.682277                | 0.884580  | 0.828652  |
| 15            | 1             | 0           | 3.196244                | -1.521129 | -0.000018 |
| 16            | 1             | 0           | -3.062228               | 0.605597  | -0.000008 |
| 17            | 1             | 0           | -1.928023               | 2.779069  | 0.000007  |
| 18            | 1             | 0           | 0.565816                | 2.942470  | 0.000009  |
| 19            | 1             | 0           | 2.682305                | 0.884619  | -0.828605 |

**N7-protonated amino N9H B (B-10) B3LYP/6-31+G(d)**

SCF Done: E(RB+HF-LYP) = -419.577177433 A.U.

|                                              |             |
|----------------------------------------------|-------------|
| Zero-point correction=                       | 0.159986    |
| (Hartree/Particle)                           |             |
| Thermal correction to Energy=                | 0.167896    |
| Thermal correction to Enthalpy=              | 0.168840    |
| Thermal correction to Gibbs Free Energy=     | 0.127431    |
| Sum of electronic and zero-point Energies=   | -419.417191 |
| Sum of electronic and thermal Energies=      | -419.409282 |
| Sum of electronic and thermal Enthalpies=    | -419.408337 |
| Sum of electronic and thermal Free Energies= | -419.449746 |

|       |             |                |                |
|-------|-------------|----------------|----------------|
|       | E (Thermal) | CV             | S              |
|       | KCal/Mol    | Cal/Mol-Kelvin | Cal/Mol-Kelvin |
| Total | 105.356     | 31.738         | 87.152         |

| Center Number | Atomic Number | Atomic Type | Coordinates (Angstroms) |           |           |
|---------------|---------------|-------------|-------------------------|-----------|-----------|
|               |               |             | X                       | Y         | Z         |
| 1             | 6             | 0           | -0.762482               | 0.808002  | 0.000000  |
| 2             | 6             | 0           | -0.128350               | -0.447442 | -0.000006 |
| 3             | 6             | 0           | 1.267290                | -0.600132 | -0.000014 |
| 4             | 6             | 0           | 1.974468                | 0.602500  | -0.000008 |
| 5             | 6             | 0           | 1.344162                | 1.866891  | 0.000005  |
| 6             | 6             | 0           | -0.039224               | 2.002524  | 0.000005  |
| 7             | 6             | 0           | -2.341278               | -0.775673 | 0.000000  |
| 8             | 7             | 0           | -1.158418               | -1.395381 | -0.000005 |

|    |   |   |           |           |           |
|----|---|---|-----------|-----------|-----------|
| 9  | 7 | 0 | -2.135569 | 0.544200  | 0.000005  |
| 10 | 6 | 0 | 1.928433  | -1.953725 | 0.000011  |
| 11 | 1 | 0 | 1.654753  | -2.538419 | 0.888002  |
| 12 | 1 | 0 | 1.653768  | -2.538958 | -0.887319 |
| 13 | 1 | 0 | 3.016483  | -1.852425 | -0.000622 |
| 14 | 1 | 0 | -2.876252 | 1.237289  | 0.000002  |
| 15 | 1 | 0 | -3.306601 | -1.261594 | 0.000004  |
| 16 | 1 | 0 | 3.060041  | 0.564350  | -0.000016 |
| 17 | 1 | 0 | 1.962654  | 2.758964  | 0.000004  |
| 18 | 1 | 0 | -0.521881 | 2.974207  | 0.000002  |
| 19 | 1 | 0 | -1.043177 | -2.402808 | -0.000006 |

**N7-protonated amino N9H B (B-10) B3LYP/6-31+G(d) cpcm, water, RADII=UAKS**

Total free energy in solution:

with all non electrostatic terms (a.u.) = -419.672183

(Polarized solute)-Solvent (kcal/mol) = -64.44

Cavitation energy (kcal/mol) = 18.16

Dispersion energy (kcal/mol) = -21.40

Repulsion energy (kcal/mol) = 4.62

Total non electrostatic (kcal/mol) = 1.38

**C8-deprotonated amino N7H B (B-11) B3LYP/6-31+G(d)**

SCF Done: E(RB3LYP) = -418.584242278

Zero-point correction= 0.130935  
(Hartree/Particle)

Thermal correction to Energy= 0.138822

Thermal correction to Enthalpy= 0.139766

Thermal correction to Gibbs Free Energy= 0.098570

Sum of electronic and zero-point Energies= -418.453307

Sum of electronic and thermal Energies= -418.445420

Sum of electronic and thermal Enthalpies= -418.444476

Sum of electronic and thermal Free Energies= -418.485672

|       | E (Thermal)<br>KCal/Mol | CV<br>Cal/Mol-Kelvin | S<br>Cal/Mol-Kelvin |
|-------|-------------------------|----------------------|---------------------|
| Total | 87.112                  | 31.197               | 86.705              |

| Center<br>Number | Atomic<br>Number | Atomic<br>Type | Coordinates (Angstroms) |           |           |
|------------------|------------------|----------------|-------------------------|-----------|-----------|
|                  |                  |                | X                       | Y         | Z         |
| 1                | 6                | 0              | 0.907476                | 0.749706  | 0.000037  |
| 2                | 6                | 0              | 0.190643                | -0.481900 | 0.000044  |
| 3                | 6                | 0              | -1.208079               | -0.555295 | -0.000086 |
| 4                | 6                | 0              | -1.899172               | 0.668013  | -0.000073 |
| 5                | 6                | 0              | -1.214531               | 1.900518  | 0.000037  |
| 6                | 6                | 0              | 0.183632                | 1.953017  | 0.000037  |
| 7                | 6                | 0              | 2.487558                | -0.823776 | -0.000108 |
| 8                | 7                | 0              | 1.195536                | -1.428040 | 0.000002  |

|    |   |   |           |           |           |
|----|---|---|-----------|-----------|-----------|
| 9  | 7 | 0 | 2.270177  | 0.513282  | 0.000003  |
| 10 | 6 | 0 | -1.929544 | -1.883308 | 0.000036  |
| 11 | 1 | 0 | 1.065250  | -2.428391 | 0.000324  |
| 12 | 1 | 0 | -3.018098 | -1.742954 | 0.000115  |
| 13 | 1 | 0 | -1.673485 | -2.488649 | -0.883004 |
| 14 | 1 | 0 | -1.673383 | -2.488571 | 0.883091  |
| 15 | 1 | 0 | -2.989699 | 0.659657  | -0.000202 |
| 16 | 1 | 0 | -1.790844 | 2.825576  | 0.000048  |
| 17 | 1 | 0 | 0.712381  | 2.904796  | 0.000045  |

-----

**C1-deprotonated amino N7H B (B-12) B3LYP/6-31+G(d)**

SCF Done: E(RB3LYP) = -418.556348350  
Zero-point correction= 0.130428  
(Hartree/Particle)  
Thermal correction to Energy= 0.138467  
Thermal correction to Enthalpy= 0.139412  
Thermal correction to Gibbs Free Energy= 0.097815  
Sum of electronic and zero-point Energies= -418.425920  
Sum of electronic and thermal Energies= -418.417881  
Sum of electronic and thermal Enthalpies= -418.416937  
Sum of electronic and thermal Free Energies= -418.458533

|       | E (Thermal) | CV             | S              |
|-------|-------------|----------------|----------------|
|       | KCal/Mol    | Cal/Mol-Kelvin | Cal/Mol-Kelvin |
| Total | 86.890      | 31.353         | 87.547         |

-----

| Center<br>Number | Atomic<br>Number | Atomic<br>Type | Coordinates (Angstroms) |           |           |
|------------------|------------------|----------------|-------------------------|-----------|-----------|
|                  |                  |                | X                       | Y         | Z         |
| 1                | 6                | 0              | 0.792055                | 0.818255  | 0.000059  |
| 2                | 6                | 0              | 0.121697                | -0.425332 | 0.000046  |
| 3                | 6                | 0              | -1.281728               | -0.557443 | -0.000026 |
| 4                | 6                | 0              | -2.090398               | 0.596500  | -0.000035 |
| 5                | 6                | 0              | -1.373767               | 1.840450  | -0.000003 |
| 6                | 6                | 0              | 0.017097                | 1.990977  | 0.000132  |
| 7                | 6                | 0              | 2.347700                | -0.666676 | -0.000194 |
| 8                | 7                | 0              | 1.160647                | -1.367000 | 0.000075  |
| 9                | 7                | 0              | 2.179285                | 0.634636  | -0.000058 |
| 10               | 6                | 0              | -1.886099               | -1.951319 | -0.000094 |
| 11               | 1                | 0              | 3.307397                | -1.172018 | -0.000307 |
| 12               | 1                | 0              | -1.957612               | 2.767829  | -0.000236 |
| 13               | 1                | 0              | 0.499208                | 2.970422  | 0.000052  |
| 14               | 1                | 0              | 1.055414                | -2.370022 | 0.001219  |
| 15               | 1                | 0              | -2.977391               | -1.856799 | -0.000984 |
| 16               | 1                | 0              | -1.592141               | -2.543059 | -0.886564 |
| 17               | 1                | 0              | -1.593739               | -2.542282 | 0.887381  |

-----

**C2-deprotonated amino N7H B (B-13) B3LYP/6-31+G(d)**

SCF Done: E(RB3LYP) = -418.549096259

Zero-point correction= 0.130269  
(Hartree/Particle)  
Thermal correction to Energy= 0.138438  
Thermal correction to Enthalpy= 0.139382  
Thermal correction to Gibbs Free Energy= 0.097590  
Sum of electronic and zero-point Energies= -418.418827  
Sum of electronic and thermal Energies= -418.410659  
Sum of electronic and thermal Enthalpies= -418.409714  
Sum of electronic and thermal Free Energies= -418.451507

|       | E (Thermal)<br>KCal/Mol | CV<br>Cal/Mol-Kelvin | S<br>Cal/Mol-Kelvin |
|-------|-------------------------|----------------------|---------------------|
| Total | 86.871                  | 31.534               | 87.959              |

| Center<br>Number | Atomic<br>Number | Atomic<br>Type | Coordinates (Angstroms) |           |           |
|------------------|------------------|----------------|-------------------------|-----------|-----------|
|                  |                  |                | X                       | Y         | Z         |
| 1                | 6                | 0              | 0.822320                | 0.801092  | 0.000022  |
| 2                | 6                | 0              | 0.131592                | -0.430939 | 0.000061  |
| 3                | 6                | 0              | -1.267080               | -0.504420 | 0.000014  |
| 4                | 6                | 0              | -1.923627               | 0.740835  | 0.000108  |
| 5                | 6                | 0              | -1.318875               | 2.039681  | 0.000026  |
| 6                | 6                | 0              | 0.092166                | 2.010260  | -0.000059 |
| 7                | 6                | 0              | 2.338191                | -0.739204 | 0.000076  |
| 8                | 7                | 0              | 1.131869                | -1.408444 | -0.000362 |
| 9                | 7                | 0              | 2.209349                | 0.564177  | 0.000019  |
| 10               | 6                | 0              | -1.995483               | -1.829046 | -0.000070 |
| 11               | 1                | 0              | 3.280025                | -1.278096 | 0.000077  |
| 12               | 1                | 0              | 0.672151                | 2.938989  | -0.000188 |
| 13               | 1                | 0              | 1.002543                | -2.408565 | 0.001661  |
| 14               | 1                | 0              | -3.080789               | -1.665427 | -0.000727 |
| 15               | 1                | 0              | -1.757896               | -2.443578 | -0.885059 |
| 16               | 1                | 0              | -1.758940               | -2.443163 | 0.885490  |
| 17               | 1                | 0              | -3.020847               | 0.680161  | 0.000084  |

**C3-deprotonated amino N7H B (B-14) B3LYP/6-31+G(d)**

SCF Done: E(RB3LYP) = -418.552250401  
Zero-point correction= 0.129938  
(Hartree/Particle)  
Thermal correction to Energy= 0.138154  
Thermal correction to Enthalpy= 0.139098  
Thermal correction to Gibbs Free Energy= 0.097125  
Sum of electronic and zero-point Energies= -418.422312  
Sum of electronic and thermal Energies= -418.414097  
Sum of electronic and thermal Enthalpies= -418.413153  
Sum of electronic and thermal Free Energies= -418.455126

|       | E (Thermal)<br>KCal/Mol | CV<br>Cal/Mol-Kelvin | S<br>Cal/Mol-Kelvin |
|-------|-------------------------|----------------------|---------------------|
| Total | 86.693                  | 31.606               | 88.340              |

| Center Number | Atomic Number | Atomic Type | Coordinates (Angstroms) |           |           |
|---------------|---------------|-------------|-------------------------|-----------|-----------|
|               |               |             | X                       | Y         | Z         |
| 1             | 6             | 0           | -0.790562               | 0.882995  | 0.000118  |
| 2             | 6             | 0           | -0.175830               | -0.402429 | -0.000092 |
| 3             | 6             | 0           | 1.213644                | -0.589990 | 0.000004  |
| 4             | 6             | 0           | 1.943284                | 0.604367  | -0.000270 |
| 5             | 6             | 0           | 1.313545                | 1.875074  | -0.000158 |
| 6             | 6             | 0           | -0.082378               | 2.112167  | 0.000070  |
| 7             | 6             | 0           | -2.390482               | -0.593055 | -0.000392 |
| 8             | 7             | 0           | -1.216031               | -1.328872 | 0.000958  |
| 9             | 7             | 0           | -2.196089               | 0.695438  | 0.000239  |
| 10            | 6             | 0           | 1.847526                | -1.959878 | 0.000254  |
| 11            | 1             | 0           | -3.356785               | -1.087848 | -0.000577 |
| 12            | 1             | 0           | -1.141059               | -2.336065 | -0.005390 |
| 13            | 1             | 0           | 2.942208                | -1.879125 | -0.000064 |
| 14            | 1             | 0           | 1.567327                | -2.556831 | 0.884967  |
| 15            | 1             | 0           | 1.567026                | -2.557547 | -0.883910 |
| 16            | 1             | 0           | 3.037114                | 0.541975  | -0.000355 |
| 17            | 1             | 0           | 1.996521                | 2.733963  | -0.000255 |

**CH3-deprotonated amino N7H B (B-15) B3LYP/6-31+G(d)**

SCF Done: E(RB3LYP) = -418.588396752

Zero-point correction= 0.129786

(Hartree/Particle)

Thermal correction to Energy= 0.137759

Thermal correction to Enthalpy= 0.138703

Thermal correction to Gibbs Free Energy= 0.097653

Sum of electronic and zero-point Energies= -418.458610

Sum of electronic and thermal Energies= -418.450638

Sum of electronic and thermal Enthalpies= -418.449694

Sum of electronic and thermal Free Energies= -418.490744

|       | E (Thermal) | CV             | S              |
|-------|-------------|----------------|----------------|
|       | KCal/Mol    | Cal/Mol-Kelvin | Cal/Mol-Kelvin |
| Total | 86.445      | 32.499         | 86.397         |

| Center Number | Atomic Number | Atomic Type | Coordinates (Angstroms) |           |           |
|---------------|---------------|-------------|-------------------------|-----------|-----------|
|               |               |             | X                       | Y         | Z         |
| 1             | 6             | 0           | -0.705511               | -0.859948 | -0.000045 |
| 2             | 6             | 0           | -0.185937               | 0.446725  | -0.000055 |
| 3             | 6             | 0           | 1.204288                | 0.815587  | 0.000122  |
| 4             | 6             | 0           | 2.038309                | -0.359646 | 0.000323  |
| 5             | 6             | 0           | 1.532810                | -1.667990 | 0.000336  |
| 6             | 6             | 0           | 0.164432                | -1.977429 | 0.000157  |
| 7             | 6             | 0           | -2.408625               | 0.463202  | -0.000384 |
| 8             | 7             | 0           | -1.304001               | 1.272947  | -0.000276 |
| 9             | 7             | 0           | -2.103758               | -0.817713 | -0.000254 |
| 10            | 6             | 0           | 1.648197                | 2.140061  | 0.000097  |
| 11            | 1             | 0           | -3.414879               | 0.866937  | -0.000560 |
| 12            | 1             | 0           | 3.118652                | -0.213494 | 0.000469  |

|    |   |   |           |           |           |
|----|---|---|-----------|-----------|-----------|
| 13 | 1 | 0 | 2.253409  | -2.488358 | 0.000496  |
| 14 | 1 | 0 | -0.211437 | -2.996290 | 0.000171  |
| 15 | 1 | 0 | -1.287567 | 2.281545  | -0.000338 |
| 16 | 1 | 0 | 2.709368  | 2.376978  | 0.000230  |
| 17 | 1 | 0 | 0.958989  | 2.982666  | -0.000069 |

**N7-protonated amino N7H B (B-16) B3LYP/6-31+G(d)**

SCF Done: E(RB3LYP) = -419.511158580

Zero-point correction= 0.158377  
(Hartree/Particle)

Thermal correction to Energy= 0.166582  
 Thermal correction to Enthalpy= 0.167526  
 Thermal correction to Gibbs Free Energy= 0.125024  
 Sum of electronic and zero-point Energies= -419.352781  
 Sum of electronic and thermal Energies= -419.344576  
 Sum of electronic and thermal Enthalpies= -419.343632  
 Sum of electronic and thermal Free Energies= -419.386135

|       | E (Thermal)<br>KCal/Mol | CV<br>Cal/Mol-Kelvin | S<br>Cal/Mol-Kelvin |
|-------|-------------------------|----------------------|---------------------|
| Total | 104.532                 | 32.151               | 89.454              |

| Center<br>Number | Atomic<br>Number | Atomic<br>Type | Coordinates (Angstroms) |           |           |
|------------------|------------------|----------------|-------------------------|-----------|-----------|
|                  |                  |                | X                       | Y         | Z         |
| 1                | 6                | 0              | -0.743037               | 0.856862  | -0.000024 |
| 2                | 6                | 0              | -0.138506               | -0.405584 | -0.000058 |
| 3                | 6                | 0              | 1.228678                | -0.634043 | -0.000037 |
| 4                | 6                | 0              | 1.997110                | 0.550140  | 0.000006  |
| 5                | 6                | 0              | 1.421279                | 1.826266  | 0.000009  |
| 6                | 6                | 0              | 0.031810                | 2.008343  | -0.000030 |
| 7                | 6                | 0              | -2.477595               | -0.465462 | 0.000045  |
| 8                | 7                | 0              | -1.247980               | -1.389888 | -0.000042 |
| 9                | 7                | 0              | -2.154884               | 0.753122  | 0.000061  |
| 10               | 6                | 0              | 1.846875                | -2.009436 | 0.000041  |
| 11               | 1                | 0              | -1.249103               | -2.004279 | 0.827594  |
| 12               | 1                | 0              | 2.937509                | -1.944122 | -0.001436 |
| 13               | 1                | 0              | 1.557619                | -2.586538 | 0.888231  |
| 14               | 1                | 0              | 1.555276                | -2.587775 | -0.886568 |
| 15               | 1                | 0              | 3.079640                | 0.459540  | 0.000032  |
| 16               | 1                | 0              | 2.071297                | 2.695793  | 0.000053  |
| 17               | 1                | 0              | -0.424441               | 2.992349  | 0.000000  |
| 18               | 1                | 0              | -3.458241               | -0.926050 | 0.000084  |
| 19               | 1                | 0              | -1.249203               | -2.004076 | -0.827834 |

**Z13 (1,3-deazaadenine): neutral and protonated species**

**Amino N7H Z13 (Z13-1) B3LYP/6-31+G(d)**

SCF Done: E(RB+HF-LYP) = -435.614774893  
 Zero-point correction= 0.148954  
 (Hartree/Particle)  
 Thermal correction to Energy= 0.156626  
 Thermal correction to Enthalpy= 0.157570  
 Thermal correction to Gibbs Free Energy= 0.117000  
 Sum of electronic and zero-point Energies= -435.465821  
 Sum of electronic and thermal Energies= -435.458149  
 Sum of electronic and thermal Enthalpies= -435.457205  
 Sum of electronic and thermal Free Energies= -435.497774

|       |  | E (Thermal) | CV             | S              |  |  |
|-------|--|-------------|----------------|----------------|--|--|
|       |  | KCal/Mol    | Cal/Mol-Kelvin | Cal/Mol-Kelvin |  |  |
| Total |  | 98.284      | 31.655         | 85.386         |  |  |

---

| Center<br>Number | Atomic<br>Number | Atomic<br>Type | Coordinates (Angstroms) |           |           |
|------------------|------------------|----------------|-------------------------|-----------|-----------|
|                  |                  |                | X                       | Y         | Z         |
| 1                | 6                | 0              | -0.154221               | -0.458880 | 0.010484  |
| 2                | 6                | 0              | -0.703478               | 0.835341  | 0.030591  |
| 3                | 6                | 0              | 1.460477                | 1.759782  | -0.020240 |
| 4                | 6                | 0              | 1.235164                | -0.691088 | 0.010187  |
| 5                | 6                | 0              | -2.378807               | -0.651033 | -0.025211 |
| 6                | 1                | 0              | 2.132957                | 2.611832  | -0.036523 |
| 7                | 1                | 0              | -3.371883               | -1.075901 | -0.057736 |
| 8                | 7                | 0              | -1.237069               | -1.342791 | -0.027922 |
| 9                | 7                | 0              | -2.090851               | 0.653072  | 0.018414  |
| 10               | 7                | 0              | 1.745786                | -1.983455 | -0.045470 |
| 11               | 1                | 0              | 2.758388                | -2.041352 | -0.068306 |
| 12               | 1                | 0              | 1.367714                | -2.654268 | 0.615953  |
| 13               | 6                | 0              | 2.019829                | 0.468080  | -0.021030 |
| 14               | 1                | 0              | 3.101315                | 0.364467  | -0.034486 |
| 15               | 6                | 0              | 0.086384                | 1.985041  | 0.019165  |
| 16               | 1                | 0              | -0.334654               | 2.984128  | 0.032455  |
| 17               | 1                | 0              | -2.786601               | 1.390965  | 0.031609  |
| 18               | 1                | 0              | -1.184390               | -2.351107 | -0.121797 |

**Amino N7H Z13 (Z13-1) B3LYP/6-31+G(d) cpcm, water, RADII=UAKS**

Total free energy in solution:  
 with all non electrostatic terms (a.u.) = -435.261959  
 -----  
 (Polarized solute)-Solvent (kcal/mol) = -21.21  
 -----  
 Cavitation energy (kcal/mol) = 17.30  
 Dispersion energy (kcal/mol) = -20.85  
 Repulsion energy (kcal/mol) = 4.70  
 Total non electrostatic (kcal/mol) = 1.14

**N7-protonated amino N9H Z13 (Z13-2) B3LYP/6-31+G(d)**

SCF Done: E(RB3LYP) = -435.614774709

Zero-point correction= 0.148952  
 (Hartree/Particle)  
 Thermal correction to Energy= 0.156623  
 Thermal correction to Enthalpy= 0.157568  
 Thermal correction to Gibbs Free Energy= 0.116999  
 Sum of electronic and zero-point Energies= -435.465823  
 Sum of electronic and thermal Energies= -435.458151  
 Sum of electronic and thermal Enthalpies= -435.457207  
 Sum of electronic and thermal Free Energies= -435.497776

|       | E (Thermal)<br>KCal/Mol | CV<br>Cal/Mol-Kelvin | S<br>Cal/Mol-Kelvin |
|-------|-------------------------|----------------------|---------------------|
| Total | 98.283                  | 31.656               | 85.384              |

| Center<br>Number | Atomic<br>Number | Atomic<br>Type | Coordinates (Angstroms) |           |           |
|------------------|------------------|----------------|-------------------------|-----------|-----------|
|                  |                  |                | X                       | Y         | Z         |
| 1                | 6                | 0              | -0.154225               | -0.458617 | 0.010321  |
| 2                | 6                | 0              | -0.703377               | 0.835600  | 0.030361  |
| 3                | 6                | 0              | 1.460832                | 1.759627  | -0.020160 |
| 4                | 6                | 0              | 1.235040                | -0.691176 | 0.010092  |
| 5                | 6                | 0              | -2.378740               | -0.650834 | -0.025083 |
| 6                | 1                | 0              | 2.133445                | 2.611567  | -0.036269 |
| 7                | 1                | 0              | -3.371947               | -1.075412 | -0.057401 |
| 8                | 7                | 0              | -1.237121               | -1.342602 | -0.027979 |
| 9                | 7                | 0              | -2.090750               | 0.653325  | 0.018506  |
| 10               | 7                | 0              | 1.745010                | -1.983964 | -0.045204 |
| 11               | 1                | 0              | 2.757558                | -2.042660 | -0.068300 |
| 12               | 1                | 0              | 1.366314                | -2.654566 | 0.616084  |
| 13               | 6                | 0              | 2.019984                | 0.467783  | -0.020997 |
| 14               | 1                | 0              | 3.101447                | 0.364041  | -0.034517 |
| 15               | 6                | 0              | 0.086795                | 1.985135  | 0.019035  |
| 16               | 1                | 0              | -0.333983               | 2.984330  | 0.032339  |
| 17               | 1                | 0              | -2.786609               | 1.391091  | 0.032535  |
| 18               | 1                | 0              | -1.184068               | -2.350807 | -0.123147 |

***N7-protonated amino N9H Z13 (Z13-2) B3LYP/6-31+G(d) cpcm, water, RADII=UAKS***

Total free energy in solution:  
 with all non electrostatic terms (a.u.) = -435.717875

---

(Polarized solute)-Solvent (kcal/mol) = -69.38

---

Cavitation energy (kcal/mol) = 17.46  
 Dispersion energy (kcal/mol) = -21.66  
 Repulsion energy (kcal/mol) = 5.21  
 Total non electrostatic (kcal/mol) = 1.00

***Adenine hydrogen-bonded to HF at N3: N7-protonated and N7-protonated-N9-deprotonated species***



**N7-protonated N9H-adenine HF hydrogen-bound to N3 (A-N3HF-1) B3LYP/6-31+G(d)**

SCF Done: E(RB3LYP) = -568.156155523  
 Zero-point correction= 0.137790  
 (Hartree/Particle)  
 Thermal correction to Energy= 0.147286  
 Thermal correction to Enthalpy= 0.148230  
 Thermal correction to Gibbs Free Energy= 0.102911  
 Sum of electronic and zero-point Energies= -568.018366  
 Sum of electronic and thermal Energies= -568.008870  
 Sum of electronic and thermal Enthalpies= -568.007926  
 Sum of electronic and thermal Free Energies= -568.053244

|       | E (Thermal)<br>KCal/Mol | CV<br>Cal/Mol-Kelvin | S<br>Cal/Mol-Kelvin |
|-------|-------------------------|----------------------|---------------------|
| Total | 92.423                  | 36.407               | 95.381              |

| Center<br>Number | Atomic<br>Number | Atomic<br>Type | Coordinates (Angstroms) |           |           |
|------------------|------------------|----------------|-------------------------|-----------|-----------|
|                  |                  |                | X                       | Y         | Z         |
| 1                | 6                | 0              | 0.702735                | 0.605684  | 0.000040  |
| 2                | 6                | 0              | -0.553986               | 0.004886  | -0.000007 |
| 3                | 6                | 0              | 0.316441                | -2.036011 | -0.000096 |
| 4                | 6                | 0              | 1.828572                | -0.264261 | 0.000012  |
| 5                | 6                | 0              | -0.855143               | 2.200468  | 0.000098  |
| 6                | 1                | 0              | 0.192194                | -3.114544 | -0.000151 |
| 7                | 1                | 0              | -1.327059               | 3.173294  | 0.000141  |
| 8                | 7                | 0              | 1.570818                | -1.584413 | -0.000057 |
| 9                | 7                | 0              | -0.809274               | -1.302298 | -0.000076 |
| 10               | 7                | 0              | 0.466675                | 1.984383  | 0.000105  |
| 11               | 7                | 0              | -1.492229               | 1.029061  | 0.000031  |
| 12               | 7                | 0              | 3.113645                | 0.124844  | 0.000047  |
| 13               | 1                | 0              | 3.827321                | -0.595649 | 0.000023  |
| 14               | 1                | 0              | 3.415978                | 1.087965  | 0.000101  |
| 15               | 1                | 0              | 1.153324                | 2.730570  | 0.000151  |
| 16               | 1                | 0              | -2.502803               | 0.840200  | 0.000009  |
| 17               | 9                | 0              | -3.413116               | -0.839430 | -0.000089 |
| 18               | 1                | 0              | -2.620085               | -1.392602 | -0.000105 |

**N9-deprotonated N7-protonated N9H-adenine HF hydrogen-bound to N3 (A-N3HF-2) B3LYP/6-31+G(d)**

SCF Done: E(RB3LYP) = -567.792267091  
 Zero-point correction= 0.124293  
 (Hartree/Particle)  
 Thermal correction to Energy= 0.133874  
 Thermal correction to Enthalpy= 0.134818  
 Thermal correction to Gibbs Free Energy= 0.088268  
 Sum of electronic and zero-point Energies= -567.667974  
 Sum of electronic and thermal Energies= -567.658393

Sum of electronic and thermal Enthalpies= -567.657449  
 Sum of electronic and thermal Free Energies= -567.703999

|       | E (Thermal)<br>KCal/Mol | CV<br>Cal/Mol-Kelvin | S<br>Cal/Mol-Kelvin |
|-------|-------------------------|----------------------|---------------------|
| Total | 84.007                  | 35.518               | 97.973              |

| Center<br>Number | Atomic<br>Number | Atomic<br>Type | Coordinates (Angstroms) |           |           |
|------------------|------------------|----------------|-------------------------|-----------|-----------|
|                  |                  |                | X                       | Y         | Z         |
| 1                | 6                | 0              | -0.986257               | 0.326712  | -0.004977 |
| 2                | 6                | 0              | 0.395047                | 0.594361  | 0.004226  |
| 3                | 6                | 0              | 0.812527                | -1.617432 | -0.025390 |
| 4                | 6                | 0              | -1.416343               | -1.010368 | 0.000048  |
| 5                | 6                | 0              | -0.567550               | 2.491817  | -0.006920 |
| 6                | 1                | 0              | 1.528450                | -2.434410 | -0.042072 |
| 7                | 1                | 0              | -0.766376               | 3.556020  | -0.016527 |
| 8                | 7                | 0              | -0.483118               | -1.971281 | -0.019106 |
| 9                | 7                | 0              | 1.320045                | -0.385572 | -0.004129 |
| 10               | 7                | 0              | -1.591147               | 1.574397  | -0.005139 |
| 11               | 7                | 0              | 0.628207                | 1.951880  | 0.007326  |
| 12               | 7                | 0              | -2.734903               | -1.395929 | -0.032937 |
| 13               | 1                | 0              | -2.884417               | -2.385952 | 0.126288  |
| 14               | 1                | 0              | -3.429603               | -0.793231 | 0.387667  |
| 15               | 1                | 0              | -2.574806               | 1.788692  | -0.090557 |
| 16               | 9                | 0              | 3.970013                | -0.292018 | 0.022164  |
| 17               | 1                | 0              | 2.998502                | -0.227955 | 0.011694  |

**Q hydrogen-bound to HF at N3: N7-protonated and N7-protonated-N9-deprotonated species**

**N7-protonated N9H-Q HF hydrogen-bound to N3 (Q-N3HF-1) B3LYP/6-31+G(d)**

SCF Done: E(RB3LYP) = -536.074166096

Zero-point correction= 0.160584  
 (Hartree/Particle)  
 Thermal correction to Energy= 0.170445  
 Thermal correction to Enthalpy= 0.171389  
 Thermal correction to Gibbs Free Energy= 0.124932  
 Sum of electronic and zero-point Energies= -535.913582  
 Sum of electronic and thermal Energies= -535.903721  
 Sum of electronic and thermal Enthalpies= -535.902777  
 Sum of electronic and thermal Free Energies= -535.949234

|       | E (Thermal)<br>KCal/Mol | CV<br>Cal/Mol-Kelvin | S<br>Cal/Mol-Kelvin |
|-------|-------------------------|----------------------|---------------------|
| Total | 106.956                 | 37.335               | 97.779              |

| Center | Atomic | Atomic | Coordinates (Angstroms) |  |  |
|--------|--------|--------|-------------------------|--|--|
|--------|--------|--------|-------------------------|--|--|

| Number | Number | Type | X         | Y         | Z         |
|--------|--------|------|-----------|-----------|-----------|
| 1      | 6      | 0    | -0.710127 | 0.539677  | 0.000044  |
| 2      | 6      | 0    | 0.584048  | 0.007605  | 0.000029  |
| 3      | 6      | 0    | -0.144632 | -2.106723 | -0.000082 |
| 4      | 6      | 0    | -1.828299 | -0.312071 | 0.000015  |
| 5      | 6      | 0    | 0.768258  | 2.214623  | -0.000167 |
| 6      | 1      | 0    | 0.080284  | -3.168908 | -0.000244 |
| 7      | 1      | 0    | 1.186823  | 3.211521  | 0.000047  |
| 8      | 7      | 0    | 0.909200  | -1.281486 | -0.000042 |
| 9      | 7      | 0    | -0.542059 | 1.926699  | -0.000020 |
| 10     | 7      | 0    | 1.468235  | 1.082380  | -0.000022 |
| 11     | 1      | 0    | -1.276855 | 2.626108  | -0.000067 |
| 12     | 9      | 0    | 3.493242  | -0.687244 | 0.000136  |
| 13     | 1      | 0    | 2.724540  | -1.272752 | 0.000069  |
| 14     | 6      | 0    | -1.485534 | -1.667443 | -0.000070 |
| 15     | 1      | 0    | -2.272404 | -2.415288 | -0.000208 |
| 16     | 1      | 0    | 2.487245  | 0.953909  | -0.000109 |
| 17     | 6      | 0    | -3.244589 | 0.189693  | 0.000114  |
| 18     | 1      | 0    | -3.449178 | 0.801509  | 0.887990  |
| 19     | 1      | 0    | -3.448324 | 0.804926  | -0.885580 |
| 20     | 1      | 0    | -3.953686 | -0.641137 | -0.001833 |

**N9-deprotonated N7-protonated N9H-Q HF hydrogen-bound to N3 (Q-N3HF-2)  
B3LYP/6-31+G(d)**

SCF Done: E(RB3LYP) = -535.705164777

Zero-point correction= 0.146666  
(Hartree/Particle)

Thermal correction to Energy= 0.156693

Thermal correction to Enthalpy= 0.157637

Thermal correction to Gibbs Free Energy= 0.109931

Sum of electronic and zero-point Energies= -535.558499

Sum of electronic and thermal Energies= -535.548472

Sum of electronic and thermal Enthalpies= -535.547528

Sum of electronic and thermal Free Energies= -535.595234

|       | E (Thermal)<br>KCal/Mol | CV<br>Cal/Mol-Kelvin | S<br>Cal/Mol-Kelvin |
|-------|-------------------------|----------------------|---------------------|
| Total | 98.326                  | 36.668               | 100.406             |

| Center<br>Number | Atomic<br>Number | Atomic<br>Type | Coordinates (Angstroms) |           |           |
|------------------|------------------|----------------|-------------------------|-----------|-----------|
|                  |                  |                | X                       | Y         | Z         |
| 1                | 6                | 0              | 0.953945                | 0.334740  | 0.000000  |
| 2                | 6                | 0              | -0.441835               | 0.580527  | -0.000006 |
| 3                | 6                | 0              | -0.872837               | -1.647072 | -0.000007 |
| 4                | 6                | 0              | 1.474820                | -0.962732 | 0.000000  |
| 5                | 6                | 0              | 0.483441                | 2.497579  | 0.000000  |
| 6                | 1                | 0              | -1.614941               | -2.441296 | -0.000010 |
| 7                | 1                | 0              | 0.664439                | 3.565083  | 0.000002  |
| 8                | 7                | 0              | -1.355179               | -0.400935 | -0.000009 |

|    |   |   |           |           |           |
|----|---|---|-----------|-----------|-----------|
| 9  | 7 | 0 | 1.525023  | 1.595273  | 0.000004  |
| 10 | 7 | 0 | -0.699840 | 1.937372  | -0.000006 |
| 11 | 1 | 0 | 2.509521  | 1.821957  | 0.000010  |
| 12 | 9 | 0 | -3.994145 | -0.352391 | 0.000013  |
| 13 | 1 | 0 | -3.022948 | -0.255086 | 0.000001  |
| 14 | 6 | 0 | 0.498279  | -1.963376 | -0.000003 |
| 15 | 1 | 0 | 0.795747  | -3.008241 | -0.000005 |
| 16 | 6 | 0 | 2.953224  | -1.249777 | 0.000007  |
| 17 | 1 | 0 | 3.442979  | -0.822763 | -0.885179 |
| 18 | 1 | 0 | 3.442944  | -0.822890 | 0.885274  |
| 19 | 1 | 0 | 3.145318  | -2.326551 | -0.000067 |

**Z1 hydrogen-bound to HF at N3: N7-protonated and N7-protonated-N9-deprotonated species**

**N7-protonated N9H-Z1 HF hydrogen-bound to N3 (Z1-N3HF-1) B3LYP/6-31+G(d)**

SCF Done: E(RB3LYP) = -552.117429292

Zero-point correction= 0.149075  
(Hartree/Particle)  
Thermal correction to Energy= 0.159071  
Thermal correction to Enthalpy= 0.160015  
Thermal correction to Gibbs Free Energy= 0.113253  
Sum of electronic and zero-point Energies= -551.968355  
Sum of electronic and thermal Energies= -551.958358  
Sum of electronic and thermal Enthalpies= -551.957414  
Sum of electronic and thermal Free Energies= -552.004176

|       | E (Thermal)<br>KCal/Mol | CV<br>Cal/Mol-Kelvin | S<br>Cal/Mol-Kelvin |
|-------|-------------------------|----------------------|---------------------|
| Total | 99.819                  | 37.789               | 98.419              |

| Center<br>Number | Atomic<br>Number | Atomic<br>Type | Coordinates (Angstroms) |           |           |
|------------------|------------------|----------------|-------------------------|-----------|-----------|
|                  |                  |                | X                       | Y         | Z         |
| 1                | 6                | 0              | -0.711951               | 0.577963  | 0.000095  |
| 2                | 6                | 0              | 0.563975                | 0.004634  | 0.000125  |
| 3                | 6                | 0              | -0.208639               | -2.089378 | 0.000077  |
| 4                | 6                | 0              | -1.852390               | -0.261174 | 0.000007  |
| 5                | 6                | 0              | 0.814087                | 2.210150  | 0.000034  |
| 6                | 1                | 0              | -0.007554               | -3.156152 | 0.000091  |
| 7                | 1                | 0              | 1.261327                | 3.194260  | 0.000030  |
| 8                | 7                | 0              | 0.871795                | -1.286968 | 0.000135  |
| 9                | 7                | 0              | -0.503649               | 1.961942  | -0.000061 |
| 10               | 7                | 0              | 1.476673                | 1.056622  | 0.000080  |
| 11               | 7                | 0              | -3.129236               | 0.189730  | -0.000306 |
| 12               | 1                | 0              | -3.901623               | -0.462975 | 0.000291  |
| 13               | 1                | 0              | -3.376435               | 1.167752  | 0.000408  |
| 14               | 1                | 0              | -1.205137               | 2.693208  | 0.000115  |
| 15               | 1                | 0              | 2.491134                | 0.892041  | -0.000059 |

|    |   |   |           |           |           |
|----|---|---|-----------|-----------|-----------|
| 16 | 9 | 0 | 3.441419  | -0.769494 | -0.000179 |
| 17 | 1 | 0 | 2.636794  | -1.314214 | -0.000169 |
| 18 | 6 | 0 | -1.529870 | -1.637004 | 0.000005  |
| 19 | 1 | 0 | -2.331642 | -2.368896 | -0.000098 |

-----

**N9-deprotonated N7-protonated N9H-Z1 HF hydrogen-bound to N3 (Z1-N3HF-2)  
B3LYP/6-31+G(d)**

SCF Done: E(RB3LYP) = -551.744199222

Zero-point correction= 0.135835  
(Hartree/Particle)

Thermal correction to Energy= 0.145555

Thermal correction to Enthalpy= 0.146499

Thermal correction to Gibbs Free Energy= 0.099842

Sum of electronic and zero-point Energies= -551.608365

Sum of electronic and thermal Energies= -551.598644

Sum of electronic and thermal Enthalpies= -551.597700

Sum of electronic and thermal Free Energies= -551.644357

|       | E (Thermal) | CV             | S              |
|-------|-------------|----------------|----------------|
|       | KCal/Mol    | Cal/Mol-Kelvin | Cal/Mol-Kelvin |
| Total | 91.337      | 36.521         | 98.198         |

-----

| Center<br>Number | Atomic<br>Number | Atomic<br>Type | Coordinates (Angstroms) |           |           |
|------------------|------------------|----------------|-------------------------|-----------|-----------|
|                  |                  |                | X                       | Y         | Z         |
| 1                | 6                | 0              | -0.976411               | 0.319843  | -0.008034 |
| 2                | 6                | 0              | 0.411758                | 0.583534  | 0.001440  |
| 3                | 6                | 0              | 0.885595                | -1.631378 | -0.029780 |
| 4                | 6                | 0              | -1.468433               | -0.992587 | 0.000532  |
| 5                | 6                | 0              | -0.547189               | 2.488304  | -0.009390 |
| 6                | 1                | 0              | 1.640106                | -2.413848 | -0.041926 |
| 7                | 1                | 0              | -0.745299               | 3.552675  | -0.021149 |
| 8                | 7                | 0              | 1.349726                | -0.377773 | -0.006969 |
| 9                | 7                | 0              | -1.574949               | 1.570635  | -0.001120 |
| 10               | 7                | 0              | 0.643662                | 1.945883  | 0.005315  |
| 11               | 7                | 0              | -2.827781               | -1.281819 | -0.033840 |
| 12               | 1                | 0              | -3.067548               | -2.249844 | 0.146256  |
| 13               | 1                | 0              | -3.437226               | -0.649291 | 0.471460  |
| 14               | 1                | 0              | -2.553674               | 1.785338  | -0.130375 |
| 15               | 9                | 0              | 3.975976                | -0.278924 | 0.030379  |
| 16               | 1                | 0              | 3.000390                | -0.203508 | 0.015560  |
| 17               | 6                | 0              | -0.472767               | -1.980782 | -0.025556 |
| 18               | 1                | 0              | -0.750454               | -3.031288 | -0.032210 |

-----

**Z hydrogen-bonded to HF at N3: neutral and N7-protonated-N9-deprotonated species**

**N9H-Z HF hydrogen-bound to N3 (Z-N3HF-1) B3LYP/6-31+G(d)**

SCF Done: E(RB3LYP) = -551.759481990  
 Zero-point correction= 0.136180  
 (Hartree/Particle)  
 Thermal correction to Energy= 0.145703  
 Thermal correction to Enthalpy= 0.146647  
 Thermal correction to Gibbs Free Energy= 0.100964  
 Sum of electronic and zero-point Energies= -551.623302  
 Sum of electronic and thermal Energies= -551.613779  
 Sum of electronic and thermal Enthalpies= -551.612835  
 Sum of electronic and thermal Free Energies= -551.658518

|       | E (Thermal)<br>KCal/Mol | CV<br>Cal/Mol-Kelvin | S<br>Cal/Mol-Kelvin |
|-------|-------------------------|----------------------|---------------------|
| Total | 91.430                  | 36.176               | 96.147              |

| Center<br>Number | Atomic<br>Number | Atomic<br>Type | Coordinates (Angstroms) |           |           |
|------------------|------------------|----------------|-------------------------|-----------|-----------|
|                  |                  |                | X                       | Y         | Z         |
| 1                | 6                | 0              | -0.787945               | 0.615727  | -0.004652 |
| 2                | 6                | 0              | 0.545203                | 0.158174  | -0.000198 |
| 3                | 6                | 0              | -0.086397               | -1.994782 | -0.005268 |
| 4                | 6                | 0              | -1.763873               | -0.408584 | -0.002466 |
| 5                | 6                | 0              | 0.596545                | 2.392771  | -0.001494 |
| 6                | 1                | 0              | 0.172252                | -3.050065 | -0.007112 |
| 7                | 1                | 0              | 1.063420                | 3.367494  | -0.003052 |
| 8                | 7                | 0              | -1.391789               | -1.702728 | -0.002698 |
| 9                | 7                | 0              | 0.932554                | -1.132250 | -0.001519 |
| 10               | 7                | 0              | 1.370939                | 1.244053  | 0.002935  |
| 11               | 7                | 0              | -3.102454               | -0.153005 | -0.034072 |
| 12               | 9                | 0              | 3.476974                | -0.842276 | 0.007680  |
| 13               | 1                | 0              | 2.544122                | -1.175708 | 0.003425  |
| 14               | 1                | 0              | 2.383201                | 1.175457  | 0.004153  |
| 15               | 6                | 0              | -0.734873               | 2.051784  | -0.006174 |
| 16               | 1                | 0              | -1.560753               | 2.750059  | -0.017989 |
| 17               | 1                | 0              | -3.722812               | -0.936163 | 0.123753  |
| 18               | 1                | 0              | -3.448911               | 0.766371  | 0.196688  |

**N9-deprotonated N9H-Z HF hydrogen-bound to N3 (Z-N3HF-2) B3LYP/6-31+G(d)**

SCF Done: E(RB3LYP) = -551.214184424  
 Zero-point correction= 0.122028  
 (Hartree/Particle)  
 Thermal correction to Energy= 0.131167  
 Thermal correction to Enthalpy= 0.132111  
 Thermal correction to Gibbs Free Energy= 0.086870  
 Sum of electronic and zero-point Energies= -551.092156  
 Sum of electronic and thermal Energies= -551.083018  
 Sum of electronic and thermal Enthalpies= -551.082073  
 Sum of electronic and thermal Free Energies= -551.127314

|  | E (Thermal)<br>KCal/Mol | CV<br>Cal/Mol-Kelvin | S<br>Cal/Mol-Kelvin |
|--|-------------------------|----------------------|---------------------|
|--|-------------------------|----------------------|---------------------|

Total 82.308 34.368 95.218

| Center Number | Atomic Number | Atomic Type | Coordinates (Angstroms) |           |           |
|---------------|---------------|-------------|-------------------------|-----------|-----------|
|               |               |             | X                       | Y         | Z         |
| 1             | 6             | 0           | 1.030413                | 0.342795  | -0.020060 |
| 2             | 6             | 0           | -0.379007               | 0.655238  | -0.005941 |
| 3             | 6             | 0           | -0.853556               | -1.577611 | -0.016997 |
| 4             | 6             | 0           | 1.372517                | -1.013828 | -0.014887 |
| 5             | 6             | 0           | 0.644299                | 2.536572  | 0.005600  |
| 6             | 1             | 0           | -1.599765               | -2.369863 | -0.019720 |
| 7             | 1             | 0           | 0.746996                | 3.619409  | 0.011631  |
| 8             | 7             | 0           | 0.433426                | -1.975963 | -0.013265 |
| 9             | 7             | 0           | -1.320809               | -0.332674 | -0.008968 |
| 10            | 7             | 0           | -0.607995               | 1.982221  | 0.009556  |
| 11            | 7             | 0           | 2.703361                | -1.448519 | -0.050843 |
| 12            | 1             | 0           | 2.800933                | -2.406575 | 0.269114  |
| 13            | 1             | 0           | 3.358571                | -0.816367 | 0.394904  |
| 14            | 9             | 0           | -3.855557               | -0.280256 | 0.022561  |
| 15            | 1             | 0           | -2.836536               | -0.201524 | 0.009071  |
| 16            | 6             | 0           | 1.688809                | 1.607652  | -0.011723 |
| 17            | 1             | 0           | 2.753065                | 1.816851  | -0.039369 |

***N1 protonated adenine (cpcm calculations in water)***

***N1-protonated N9H-adenine (A-1) B3LYP/6-31+G(d) (cpcm, water, RADII=UAKS)***

B3LYP/6-31+G\* scrf=(read,cpcm,solvent=water) RADII=UAKS

SCF Done: E(RB+HF-LYP) = -467.819505843 A.U.

Total free energy in solution:

with all non electrostatic terms (a.u.) = -467.818917

(Polarized solute)-Solvent (kcal/mol) = -74.62

Cavitation energy (kcal/mol) = 16.47

Dispersion energy (kcal/mol) = -21.46

Repulsion energy (kcal/mol) = 5.36

Total non electrostatic (kcal/mol) = 0.37

| Center Number | Atomic Number | Atomic Type | Coordinates (Angstroms) |           |          |
|---------------|---------------|-------------|-------------------------|-----------|----------|
|               |               |             | X                       | Y         | Z        |
| 1             | 6             | 0           | -0.734051               | 0.780031  | 0.000000 |
| 2             | 6             | 0           | -0.220977               | -0.525437 | 0.000000 |
| 3             | 6             | 0           | 1.175335                | -0.685161 | 0.000000 |
| 4             | 6             | 0           | 1.262181                | 1.743391  | 0.000000 |
| 5             | 6             | 0           | -2.325241               | -0.747580 | 0.000000 |
| 6             | 1             | 0           | 1.941759                | 2.589352  | 0.000000 |
| 7             | 1             | 0           | -3.330153               | -1.148743 | 0.000000 |

|    |   |   |           |           |           |
|----|---|---|-----------|-----------|-----------|
| 8  | 7 | 0 | 1.869922  | 0.498898  | 0.000000  |
| 9  | 7 | 0 | -0.024130 | 1.930110  | 0.000000  |
| 10 | 7 | 0 | -1.223488 | -1.462505 | 0.000000  |
| 11 | 7 | 0 | -2.086594 | 0.614838  | 0.000000  |
| 12 | 7 | 0 | 1.794125  | -1.864990 | 0.000000  |
| 13 | 1 | 0 | 2.800194  | -1.974456 | 0.000004  |
| 14 | 1 | 0 | 1.229318  | -2.708138 | 0.000000  |
| 15 | 1 | 0 | -2.779608 | 1.356180  | 0.000000  |
| 16 | 1 | 0 | 2.886164  | 0.479884  | -0.000002 |

***N9-deprotonated N1-protonated N9H-adenine (neutral) (A-2) B3LYP/6-31+G(d)  
(cpcm, water, RADII=UAKS)***

SCF Done: E(RB+HF-LYP) = -467.356678961 A.U.

Total free energy in solution:  
with all non electrostatic terms (a.u.) = -467.355590

(Polarized solute)-Solvent (kcal/mol) = -39.11

Cavitation energy (kcal/mol) = 16.41

Dispersion energy (kcal/mol) = -20.33

Repulsion energy (kcal/mol) = 4.61

Total non electrostatic (kcal/mol) = 0.68

| Center<br>Number | Atomic<br>Number | Atomic<br>Type | Coordinates (Angstroms) |           |           |
|------------------|------------------|----------------|-------------------------|-----------|-----------|
|                  |                  |                | X                       | Y         | Z         |
| 1                | 6                | 0              | -0.810944               | 0.802569  | -0.006850 |
| 2                | 6                | 0              | -0.254140               | -0.524888 | -0.012005 |
| 3                | 6                | 0              | 1.117571                | -0.684413 | -0.003859 |
| 4                | 6                | 0              | 1.234375                | 1.736197  | 0.004785  |
| 5                | 6                | 0              | -2.343517               | -0.645029 | 0.008056  |
| 6                | 1                | 0              | 1.927849                | 2.571964  | 0.011843  |
| 7                | 1                | 0              | -3.346808               | -1.056551 | 0.017012  |
| 8                | 7                | 0              | 1.838060                | 0.485162  | 0.000107  |
| 9                | 7                | 0              | -0.046017               | 1.937064  | 0.003309  |
| 10               | 7                | 0              | -1.264005               | -1.443344 | 0.000544  |
| 11               | 7                | 0              | -2.144568               | 0.706753  | 0.006973  |
| 12               | 7                | 0              | 1.772720                | -1.885747 | -0.064669 |
| 13               | 1                | 0              | 2.659361                | -1.981556 | 0.416231  |
| 14               | 1                | 0              | 1.157114                | -2.684862 | 0.048118  |
| 15               | 1                | 0              | 2.849084                | 0.445169  | -0.057818 |
